# Supplementary material for: Parallel shift of DNA methylation and gene expression toward the mean in mouse spleen with aging
Source: Aging (Albany NY). 2023 Jul 25;15(14):6690–709. doi: 10.18632/aging.204903 (PMC10415566; doi:10.18632/aging.204903)
Supplement: Supplementary File 1 [file aging-15-204903-s002.xlsx]

## Sheet: Count_data
Supplementary File 1. SiNG-PCR-seq count data.
			Replicate1																				Replicate1																				Replicate1
Gene	Amplicon	MR_origin	M2-1	M2-2	M2-3	M2-4	M2-5	M2-6	M6-1	M6-2	M6-3	M6-4	M6-5	M12-1	M12-2	M12-3	M12-4	M12-5	M23-1	M23-2	M23-3	Ref	M2-1	M2-2	M2-3	M2-4	M2-5	M2-6	M6-1	M6-2	M6-3	M6-4	M6-5	M12-1	M12-2	M12-3	M12-4	M12-5	M23-1	M23-2	M23-3	Ref	M2-1	M2-2	M2-3	M2-4	M2-5	M2-6	M6-1
Arf1	ARF1-2	M	18	13	20	17	32	5	14	12	8	3	2	44	12	7	15	102	109	315	78	1305	17	5	30	28	41	19	11	1	2	5	8	37	25	28	36	75	51	467	111	896	15	33	25	29	32	24	10
Arf1	ARF1-2	R	323	218	323	158	265	101	344	348	478	213	153	571	426	244	243	339	664	750	821	1205	193	80	284	165	221	188	260	329	444	315	282	728	401	270	297	397	541	1340	930	1226	303	200	326	167	211	190	406
Arf3	ARF3-3	M	6290	6495	5044	5289	6382	3295	5354	6439	5553	3993	2852	4677	4359	4442	6720	4961	6720	796	2309	1614	6169	4695	5972	8252	8073	7634	6168	6839	6098	6651	6812	5992	5786	6728	7886	6505	5689	1828	3422	1614	8827	8347	8455	9302	7804	8915	8451
Arf3	ARF3-3	R	315	259	322	172	291	124	327	352	463	196	160	756	561	286	383	461	1320	1194	1122	1663	344	138	327	232	331	260	378	386	418	383	458	862	651	422	408	489	976	2684	1598	1584	437	276	473	237	240	271	536
Arf4	ARF4-1	M	18347	16930	12929	17053	17083	9080	9996	16006	17267	12229	8574	14793	14272	18804	16949	19219	33009	7294	15831	4451	18737	16199	15258	20497	19863	18573	15261	18105	20276	22101	18828	19369	19324	18420	22646	19808	22949	10876	19105	4711	23467	24238	18984	20969	20182	22254	22982
Arf4	ARF4-1	R	1140	805	1246	692	1083	537	955	1573	1678	821	848	2554	1928	1670	1551	1843	3289	4590	4313	6933	1037	654	1257	849	1212	950	1523	1672	1917	1491	1705	2751	2556	1525	1671	1810	2173	5934	3426	6817	1402	913	1555	865	1126	1080	2102
Arf5	ARF5-1	M	5470	4336	3764	3212	4794	2243	3856	4768	4689	2620	2548	5103	5520	4494	5480	4548	9979	5244	7265	355	5818	4083	4733	5121	6086	5010	5686	5532	6190	4421	6003	6559	6635	5420	7413	5210	8000	8312	7719	276	8237	6974	6198	5784	6421	5871	8391
Arf5	ARF5-1	R	118	64	132	89	139	70	140	173	173	82	56	153	158	145	129	176	233	165	178	252	88	61	134	108	143	117	124	134	171	171	123	163	152	140	136	173	174	189	186	228	129	130	181	135	140	132	196
Arf6	ARF6-1	M	20338	21208	18494	20299	21692	11472	11675	18895	19895	14773	12315	22036	21854	28035	22069	24460	37342	17201	25842	6333	21198	21571	19778	25082	25211	20807	21131	23516	21229	24300	25932	26041	27614	21203	28484	22243	22511	20027	24332	6636	24599	25564	21612	21608	24000	24072	28855
Arf6	ARF6-1	R	151	118	157	115	145	56	125	164	271	144	102	433	256	264	195	290	753	1074	629	6376	145	104	196	154	175	107	194	263	263	204	195	434	311	121	274	217	653	1416	797	9683	225	100	193	99	159	145	242
Arpc5	ARPC5-2	M	21228	21854	17549	19036	22008	12133	15796	20559	21583	15577	11314	22632	20588	20504	23428	22309	37450	17263	21943	2789	20303	15855	17516	22189	22317	22062	18108	20650	22459	22971	22511	23229	22032	21268	24755	21410	24674	23323	19874	1667	27355	26686	23305	25319	23590	25604	26666
Arpc5	ARPC5-2	R	184	298	385	259	355	155	405	376	395	259	177	814	665	385	358	394	748	1016	1149	2797	232	184	407	244	300	272	392	353	462	356	350	607	551	478	411	392	486	1376	1282	2237	365	336	576	287	318	239	656
Asf1a	ASF1A-1	M	1105	859	535	595	744	317	756	802	991	341	325	517	742	469	847	564	1584	353	640	340	903	529	536	767	833	728	601	668	732	643	661	667	791	761	1153	769	1235	762	969	265	1032	931	791	894	765	740	874
Asf1a	ASF1A-1	R	143	110	99	57	94	52	173	181	205	108	55	184	193	113	124	130	309	192	260	388	80	65	145	104	122	91	134	135	172	155	150	273	212	128	159	177	260	380	288	273	129	81	137	99	104	87	159
Ash1l	ASH1L-7	M	44810	46602	36663	48202	50774	26745	28921	44461	41177	31947	24477	33005	34444	48519	49328	41748	39075	11001	24131	24411	48545	45529	46134	60091	58996	57078	42680	50689	51507	52978	51671	39490	43621	47509	61864	43424	26963	16338	24526	26792	53332	59457	49341	55456	53352	53705	55146
Ash1l	ASH1L-7	R	5829	3836	5292	3097	5762	1983	5532	6780	8011	4760	4441	17391	11893	8781	7373	10471	34680	24408	23974	18391	5963	3925	6737	4291	5609	4724	9450	7023	10087	8917	9111	18135	15743	8496	9524	11072	22149	33328	27921	19087	6172	4549	6454	3684	4887	4926	12106
Ash1l	ASH1L-9	M	4992	6714	4959	6496	7070	3807	2023	5342	3026	3817	2859	3068	3845	7135	6185	4901	3941	1206	1932	2366	6033	6897	4662	6895	6713	4948	3630	5814	3366	4597	6330	2986	4489	4102	6496	4045	1644	1261	1955	2847	6590	5751	5967	6475	6674	7136	4556
Ash1l	ASH1L-9	R	918	805	943	650	1045	523	584	972	978	552	823	1775	1605	1516	1256	1825	4089	2386	2571	1794	851	668	930	620	911	517	1002	1054	1059	993	1543	1590	2159	1005	1405	1351	2506	2486	2927	2467	1096	590	1463	481	829	751	1467
Asxl1	ASXL1-3	M	2319	4368	2652	3849	3880	2450	1403	2514	1592	2389	1944	2530	2463	4548	4669	2959	2922	2619	2350	4777	2658	3425	2226	3346	3481	3133	1451	2384	1516	2763	3117	1867	2478	2306	3672	3444	1436	2931	1838	4937	3128	3599	2588	3269	2887	3195	1604
Asxl1	ASXL1-3	R	6544	4321	4442	4372	5790	2402	3051	6535	7305	3815	3026	7473	7066	6984	5989	7893	15896	6065	8616	5677	7573	5969	6207	5980	6740	4894	6422	7279	7511	6543	7813	7835	8383	6289	7421	7161	8567	7223	9701	6665	9062	5907	8112	6233	7422	6835	8960
Asxl1	ASXL1-4	M	6469	4369	1884	2587	2855	1533	1563	5498	3905	1207	771	644	717	1018	1564	2556	2162	173	334	641	4311	1813	1444	2675	1895	2290	1303	3896	3922	2057	1963	851	1057	1522	2278	3081	1446	375	377	633	2336	1161	955	1278	775	1012	805
Asxl1	ASXL1-4	R	1881	895	906	582	909	376	676	1807	1666	480	319	702	542	396	617	1136	3327	576	737	623	1230	331	577	508	598	474	677	1376	1928	748	724	901	891	754	820	1640	1916	1140	1020	698	701	203	364	281	198	263	304
Axin2	AXIN2-1	M	3440	3180	1860	2785	2441	1736	1576	2356	2195	1542	924	895	1098	1415	1736	2241	1546	780	603	2213	3429	2125	2115	4267	3641	4558	2234	3587	2765	2928	2202	1436	1484	1773	3068	3288	1686	1705	947	1619	5055	5008	2956	5424	3750	5753	3350
Axin2	AXIN2-1	R	1694	1327	1949	1032	1349	759	2176	1954	2651	1561	1171	3564	2552	1876	2303	2504	6907	3645	4594	2816	1457	703	1351	1115	1139	841	1702	1614	2494	1797	1873	3574	2663	2197	1740	1949	4064	4941	4260	2467	1946	1653	2134	1328	1513	1400	3332
Bap1	BAP1-1	M	4982	4525	2852	4242	3987	2345	2336	3112	4291	3411	2389	2846	3126	4829	4083	4488	5602	1553	2661	1771	5096	4339	3728	5858	5908	5878	4639	5717	5853	5981	5072	4846	5531	4748	6697	4989	4942	3014	3533	2595	5488	6757	3302	4545	4401	5509	5568
Bap1	BAP1-1	R	1050	784	1185	789	991	470	1099	1258	1327	1133	754	2366	1804	1874	1307	1951	3276	2542	2829	2336	1162	868	1696	1241	1408	1106	1962	1841	1838	1916	1988	4046	2752	1949	2248	2011	2532	4205	3466	3311	1256	1091	1199	759	1126	1000	2291
Bap1	BAP1-3	M	20281	19399	12022	16567	18843	9880	12356	15807	17571	11721	8742	13666	13893	15825	18434	16542	26710	7626	11089	15633	17834	14010	11549	17444	17360	16751	12667	14279	16691	15365	14946	11236	12788	14388	19175	15473	14228	8409	10243	11439	20103	20882	13296	17625	18035	18120	18363
Bap1	BAP1-3	R	8269	6193	9143	6381	8388	4512	7435	9640	11711	7986	6431	16559	13862	12429	11126	13461	21096	18914	20188	17404	5604	4105	8382	5932	6905	6426	8450	9805	9888	9345	9734	15741	12208	9704	8729	9847	13040	20591	18284	15653	8172	6777	10169	6092	7036	6557	13169
Bmi1	BMI1-1	M	426	104	52	65	89	49	82	203	481	167	87	114	102	157	215	383	131	64	65	112	940	188	173	204	198	262	211	508	547	221	239	291	331	331	404	969	367	358	223	419	503	159	105	122	111	168	257
Bmi1	BMI1-1	R	70	12	19	14	17	5	28	47	131	38	30	76	44	51	40	90	61	38	42	56	155	28	59	51	55	39	80	160	211	83	84	191	107	79	96	177	90	210	187	259	79	25	38	20	24	34	72
Bmi1	BMI1-2	M	8945	8685	6049	7597	8419	4891	5110	7312	7828	6294	4472	6749	7314	8426	8887	8943	11117	3581	5405	5405	7763	6867	6483	9159	8636	8866	6719	7610	7823	8332	7750	6614	7403	7407	9465	8368	6922	4314	5095	5717	9169	10114	6766	9157	8743	10056	9351
Bmi1	BMI1-2	R	1408	1084	1604	1004	1346	653	1324	1121	1648	1371	1065	2888	2194	1853	1438	1765	4499	3506	3914	3476	1139	815	1523	1133	1381	1015	1661	1887	2044	1952	1851	3508	2313	1668	1763	1884	2799	4759	4019	3135	1394	1250	1778	1319	1431	1322	2551
Brca1	BRCA1-3	M	1436	750	374	363	395	114	289	622	720	197	185	225	468	348	598	691	1388	648	654	687	1574	695	470	534	572	325	371	721	967	338	447	391	768	456	879	740	1378	1167	1104	875	1412	669	464	438	473	280	342
Brca1	BRCA1-3	R	1574	722	679	562	513	304	702	1688	1743	559	431	1195	740	927	678	1903	4013	1355	1343	1064	1716	519	765	679	846	652	1039	1470	2518	1042	1025	1336	1111	925	928	1898	3286	2137	1568	1331	1339	472	716	544	621	485	814
Brca2	BRCA2-1	M	5367	4373	2815	3181	3042	1220	1470	2911	2429	941	930	1965	1936	2130	3447	2927	3387	2199	2542	5641	3951	2500	2597	2930	2702	1821	1330	2693	2414	1200	1926	1356	2513	1819	3353	2600	1682	3764	2103	4349	4677	4789	3592	3287	3234	2711	2126
Brca2	BRCA2-1	R	5868	3868	4195	3321	5203	2526	4424	6282	6834	3306	2395	5934	5826	4251	4713	5998	13359	5226	6356	5468	4416	2803	3819	3231	3938	3434	4253	5539	6173	4825	4587	6083	4954	4452	4909	6169	7191	5959	6241	4807	5863	4129	5533	4155	3775	4030	6627
Brca2	BRCA2-3	M	690	402	320	229	286	113	155	312	356	138	153	215	362	226	416	308	480	313	375	751	634	417	414	386	393	262	233	378	353	175	229	180	357	234	465	299	327	452	461	518	792	615	459	317	303	183	252
Brca2	BRCA2-3	R	576	357	375	208	263	137	340	446	784	319	246	572	617	326	427	550	1633	584	787	839	760	301	597	405	405	363	584	898	929	543	441	673	594	369	403	684	1051	1070	816	568	768	497	491	308	323	394	688
Brms1	BRMS1-1	M	4601	4834	3002	4424	4989	2543	2213	3660	4228	3135	2691	3983	3623	6173	5254	5175	9933	3384	3622	2565	4035	3596	2225	3898	4318	3681	3450	3585	3237	3698	4486	3805	3929	3795	4883	4101	4549	3453	2569	2275	4767	4464	2763	4039	4435	4944	4516
Brms1	BRMS1-1	R	1077	738	1427	719	1109	622	913	1466	1454	992	768	2135	2026	1677	1561	2030	3407	2592	2993	2750	768	590	981	760	851	603	928	1392	1038	1221	1370	2235	1945	1091	1253	1063	1899	2306	3186	2452	1075	703	1406	656	932	798	1623
Carm1	CARM1-1	M	7721	5426	3505	4499	4778	2498	2514	5754	6380	2759	1752	1983	2729	2743	4327	3792	3492	883	1725	2439	6876	3689	3563	5275	4579	4866	2685	5532	5921	4474	3905	2311	3372	2988	5132	4732	2391	1514	1734	2260	6909	5878	4044	5629	3949	4754	3080
Carm1	CARM1-1	R	1815	823	1187	685	1034	621	1218	1835	2521	1024	694	2118	1897	1421	1307	2148	3263	2220	2222	3716	1340	536	1140	859	1076	918	1391	1733	2371	1441	1463	2412	1860	1622	1493	2227	2175	3183	2663	3162	1249	840	1314	975	1143	911	1703
Carm1	CARM1-3	M	39485	39074	28499	35726	38969	20373	20614	34483	31534	23639	17188	24316	30722	35044	38585	30068	40138	8622	24605	15360	40714	37963	33312	46017	44248	41365	28293	35554	38194	38101	39088	26495	36190	35166	46317	31950	24465	10633	23003	14373	48795	50949	38852	44148	41016	41634	42175
Carm1	CARM1-3	R	3789	2737	4076	3019	4624	1820	5717	5006	5594	3982	2812	12043	7926	6896	5041	8378	18419	17559	14342	16832	4127	2942	5609	3900	4756	3564	7265	5583	6922	6685	6425	12417	9223	6632	5764	8829	13511	25188	16432	16024	4610	4431	5799	3452	5486	4215	9426
Cbx2	CBX2-1	M	924	1423	987	1512	994	628	310	666	441	465	482	912	625	1215	1159	1914	1718	1945	816	2978	798	1075	671	1113	1167	702	486	472	355	501	723	528	641	450	849	1153	571	1487	613	2515	1000	1385	1068	1246	1366	1131	667
Cbx2	CBX2-1	R	4809	4481	5651	4393	5295	3049	3249	5766	7283	4560	3867	7470	7516	8719	6533	7061	13530	6919	11592	5941	4205	3355	3986	3470	4263	2630	4364	5359	3655	4516	6237	6383	7597	4247	5467	3953	6451	5918	7330	6751	5553	3677	6145	3560	4454	4406	6522
Cbx5	CBX5-1	M	10153	9131	5007	7627	7928	3476	2532	6449	6802	3896	3150	3092	5098	5424	7938	5534	6554	2452	3274	4339	9972	8198	5625	8416	7617	5850	3852	6924	6406	4873	6260	2964	6206	4851	9322	5389	3544	3352	3900	5016	10463	9405	6528	8329	7049	7222	4864
Cbx5	CBX5-1	R	3348	2600	4731	2565	4290	2284	3323	5342	5741	3897	3055	8631	6700	6303	5166	7568	15017	8257	10758	9498	3549	2502	4376	3549	4471	3773	5535	5829	5615	5395	6356	8792	7526	5217	4874	6734	8699	9419	9580	9495	3658	2687	5062	2698	4232	3934	7022
Cbx5	CBX5-3	M	1670	976	542	593	545	218	319	758	976	239	239	194	481	287	695	369	758	497	427	1971	2076	904	964	1305	1020	845	529	1253	1820	712	718	474	1104	843	1757	1215	843	1507	844	2617	2238	1517	1080	1410	852	823	842
Cbx5	CBX5-3	R	427	143	244	128	196	82	299	336	525	169	136	541	337	212	212	465	958	1091	821	2257	452	138	379	270	289	286	452	703	975	509	424	1011	866	521	567	1016	1098	2860	1699	2606	516	211	416	236	283	241	576
Cbx6	CBX6-2	M	28257	27281	21472	23827	28062	14002	17852	27070	24346	17041	13139	20398	22508	24541	27375	24994	27874	8549	15643	17142	29431	24692	25580	31519	32690	29871	22771	27837	27786	29937	29474	25892	27656	28884	33443	28575	21953	14196	20451	17851	38405	38102	31062	34897	35347	33323	35861
Cbx6	CBX6-2	R	5271	3913	5738	3942	5816	2673	6929	6441	7609	4601	3619	12672	8813	7581	6794	8472	25899	19353	20209	16980	5367	3342	5599	4414	5556	4758	7454	6335	8665	7848	8235	12800	9860	7020	7509	8270	14579	26341	17255	14675	6105	5387	8649	4948	5607	5995	9554
Cbx6	CBX6-3	M	17821	16533	12026	16452	18103	8962	8603	16433	13677	11694	8840	11232	11249	17658	19296	16052	17548	5993	6823	10118	18367	16415	14634	19144	20461	19099	14557	17801	22261	18461	20447	13697	17326	18130	22665	18464	13626	7778	9580	11051	24437	23839	20160	22109	22427	21851	19419
Cbx6	CBX6-3	R	3555	2258	3504	2012	3412	1532	3255	4325	5180	2866	2448	6876	6355	5184	4456	5378	17104	10505	12842	7885	4230	2250	3713	2661	3894	3128	3899	4382	6153	4806	5288	9478	7652	4711	4601	5278	11033	16920	13106	10013	4550	2621	5226	2802	3484	3102	6671
Cbx7	CBX7-1	M	6986	7943	6496	6712	6360	4111	6091	5285	6577	5277	3812	4945	4897	5929	5614	6937	7984	1726	3854	3111	5199	4127	5285	7820	7857	7890	6529	7026	6588	7387	6965	7122	6475	6883	7937	6103	5215	2518	3861	2205	6315	8663	5136	7340	6272	8985	8288
Cbx7	CBX7-1	R	1148	1036	1293	745	933	543	1170	1012	1434	1002	750	2347	1794	1247	1271	1713	3730	3816	3467	3615	790	437	1051	815	1032	854	1363	1274	1300	1412	1418	3129	2343	1574	1583	1673	2681	5613	3457	3145	978	996	1148	851	886	859	1810
Cbx8	CBX8-1	M	2728	3278	1736	3045	2888	1670	2174	2037	1992	1479	1456	2023	1692	2703	2530	3231	3788	2138	1527	3152	2894	2502	1783	3368	3819	3299	3296	2500	2879	2646	2888	3255	2170	2921	3720	3838	3328	3033	1950	2578	4386	5222	2148	4525	4982	4639	5543
Cbx8	CBX8-1	R	3544	4251	4762	3795	4036	2253	3974	4477	5959	4285	2969	6775	6156	6023	4891	5912	10310	6819	8977	6033	3434	3055	5293	5236	5398	5132	5597	5812	6204	6639	6924	9016	8770	6397	6498	5084	7855	9920	9197	7208	5670	6483	6791	5046	5064	6408	9421
Cdk4	CDK4-1	M	9303	7838	5471	7455	8256	3923	3875	7579	9482	5504	3982	6822	7390	9385	8593	9238	15067	4782	7361	1788	8846	7216	5594	7527	8043	6298	6126	8106	8226	7385	8615	7209	8305	6652	9339	7993	8283	5400	7090	1930	10030	8436	6220	7237	7415	7803	8012
Cdk4	CDK4-1	R	256	147	209	151	214	115	148	310	368	245	148	425	287	402	253	358	616	416	604	945	200	129	234	160	209	148	203	290	333	245	254	499	334	275	314	338	322	497	448	1081	215	166	230	155	177	140	322
Cdx2	CDX2-1	M	366	727	715	868	1078	371	56	108	95	29	48	763	432	906	658	3610	2244	4135	2403	9890	289	904	1315	977	1098	634	199	13	140	47	217	1326	679	757	1032	2944	1468	5100	2205	10373	325	843	540	675	964	923	171
Cdx2	CDX2-1	R	11730	11719	12256	10947	11963	6624	8446	12936	15136	10036	8681	17568	16060	19739	14193	14567	29471	14230	22174	9881	14257	11060	11989	12094	14650	10433	14379	15347	13946	16539	16443	17293	19148	13345	16924	12337	16366	15454	19393	10552	14262	11625	12913	9842	11079	10294	15268
Chaf1a	CHAF1A-1	M	7424	8535	5435	6498	6943	2641	2823	5324	5209	3464	3669	4160	6512	6331	8495	5605	7387	4360	5239	6172	7417	7125	5207	6313	6900	3795	3487	5039	5215	4241	6241	4033	6421	4011	8068	4707	4359	4566	4569	6429	7979	7379	5724	6494	5619	4641	4871
Chaf1a	CHAF1A-1	R	4998	4074	5678	4555	6620	3547	4283	6872	7369	5375	3790	9840	7629	9818	6359	9280	18001	9192	11724	8717	4314	3566	5221	4891	5636	5365	6745	6756	5878	6708	7292	8891	7909	6573	6189	6614	8463	9279	10402	8418	4669	4327	6230	4106	5889	6056	7916
Chaf1a	CHAF1A-3	M	2461	2485	1299	1440	1628	569	1051	1576	1304	806	863	991	1593	1230	2650	1258	2265	1129	1525	3383	2480	1893	1392	1958	1952	1134	1413	1405	1562	1132	2077	1347	2240	1481	2914	1278	1534	1978	1600	3014	3308	2937	2112	2605	1911	1256	2077
Chaf1a	CHAF1A-3	R	1627	1230	2015	1484	2085	1253	2563	2321	2391	1715	1107	3944	2654	2074	1800	2924	6730	4180	4217	3979	1551	856	2140	1797	2248	2195	2353	2367	2606	2887	2502	3896	2928	2499	2205	3031	4454	6236	4961	3961	1901	1472	2687	1739	2210	2675	3697
Crebbp	CREBBP-5	M	8076	6863	5298	6289	7086	3760	4464	7720	7387	4433	3338	4621	4615	6519	6744	7586	7395	956	2521	1762	9183	6769	6584	8195	8228	7612	6303	8691	9137	6895	7731	5745	5973	6632	8619	8491	6181	1503	3731	2199	9802	8270	7562	8175	7988	7390	8033
Crebbp	CREBBP-5	R	743	372	531	300	404	205	530	641	954	405	267	1265	906	761	579	1091	4280	2204	2025	1857	739	328	570	401	441	463	701	706	1311	734	711	1284	1223	742	704	1117	3120	3386	2484	2206	852	358	572	334	392	386	734
Crebbp	CREBBP-9	M	23217	23571	19042	21452	24756	12312	15426	24524	21252	14355	10464	15075	16673	18727	22445	20980	17606	4054	8466	10942	24841	19588	21907	28659	26661	24856	19670	25860	23977	23085	23807	17465	19555	21964	27886	22101	10255	7017	9089	9649	27114	26727	24844	27719	23954	22399	23334
Crebbp	CREBBP-9	R	2160	1551	2269	1222	2158	950	2713	2345	3977	1688	1523	5558	4450	2728	2577	4188	14546	10041	11053	8922	2625	1263	2467	1451	1828	1783	2742	2791	3712	3097	3108	6536	4606	3075	2847	4344	10201	13310	10821	8980	2761	1609	2628	1437	1844	1364	3267
Ctcf	CTCF-1	M	2664	1969	1527	1734	2028	844	857	2155	2343	1124	898	1324	1313	1829	1816	2361	2099	553	1121	1040	2673	1938	1652	2090	2074	1764	1462	2627	2443	2230	2247	1623	2154	1919	2841	2501	1403	724	1481	937	3216	2404	2064	2049	2260	2331	2223
Ctcf	CTCF-1	R	328	169	301	162	259	130	205	386	515	250	187	578	464	399	438	651	1187	885	993	1394	409	171	321	258	311	244	331	501	572	475	591	769	727	532	440	722	781	1244	967	1640	375	250	480	267	319	262	414
Ctcf	CTCF-2	M	13084	10918	7442	9215	11318	5445	6115	12009	11220	6895	5157	8286	8612	9896	12651	11299	14291	2784	5994	4793	16711	12908	10776	13734	14007	13162	10632	13689	16815	14023	15104	11775	13995	13085	17637	15205	10927	4810	9253	5946	20242	16682	14701	15529	14795	15147	15722
Ctcf	CTCF-2	R	1142	712	935	596	876	397	885	1508	1493	821	552	2122	1635	1070	1429	1813	3929	2894	3136	3569	1584	758	1553	924	1253	950	1427	1771	2652	1909	2276	3038	2598	1813	1788	2337	2876	5850	4235	5148	1835	971	1402	984	1290	977	2197
Dgcr8	DGCR8-4	M	340	389	153	341	337	179	177	156	226	151	131	162	169	249	289	204	233	118	164	153	245	241	173	383	270	303	200	219	186	189	282	167	188	243	354	229	222	140	173	137	319	515	235	434	456	385	332
Dgcr8	DGCR8-4	R	102	115	112	107	115	61	82	83	121	104	66	155	137	127	144	135	239	119	173	196	84	69	109	116	110	99	111	90	73	114	138	109	177	116	158	110	149	188	159	185	104	102	128	138	147	152	147
Dicer1	DICER1-2	M	11830	11990	8963	10346	10949	6275	7941	11482	10056	6551	4919	6521	6877	7859	10218	8634	6421	2915	3854	8496	11739	9058	10554	14617	13575	13641	9630	12909	10537	12383	11474	8713	9394	11883	14077	11343	6213	6762	6175	8939	15112	16594	13047	15538	14536	16259	15164
Dicer1	DICER1-2	R	3738	2723	3493	1915	3220	1595	4234	4438	6051	3029	2393	7565	6249	4018	3586	5541	16030	9609	11284	9359	4058	2008	3753	3002	4180	3356	5189	4221	6177	5442	4828	9061	7106	4853	5107	5544	11430	14895	11500	7247	4827	3603	5036	3742	4157	3576	7775
Dicer1	DICER1-3	M	2660	3026	2564	3261	3588	1764	1192	2858	2250	1775	1595	1849	1881	3835	3234	2612	2075	1263	1136	1903	3199	3748	2498	4158	4076	2990	2719	3445	2749	2737	3855	2235	2994	2800	4097	3006	1463	1539	1769	2628	3898	3854	3362	3615	3991	3775	3841
Dicer1	DICER1-3	R	521	450	783	427	751	326	484	788	967	616	456	1457	1367	1243	876	1233	3889	2086	2958	1483	732	564	816	661	992	500	1145	1009	1023	1143	1344	2188	2162	792	1131	1114	2361	2723	2890	2385	731	529	927	534	693	648	1269
Dnmt1	DNMT1-1	M	9036	7841	5740	6375	6994	3276	4621	7153	6890	4356	3444	4377	5500	4673	7427	5382	6464	1743	3795	3783	9823	6801	6811	9492	9268	7773	6140	8398	7946	8220	8136	5873	7216	6713	10264	6881	6046	2865	5155	3272	12504	11775	9733	10606	10544	9672	10924
Dnmt1	DNMT1-1	R	1226	769	1038	630	1088	513	1483	1472	1869	868	610	2827	1853	1315	1351	2153	4189	3570	3792	4357	1219	583	1448	1054	1210	1238	1890	1704	2376	1572	1903	3290	2183	1869	1534	2452	4172	6716	4531	4281	1576	1176	1905	1015	1435	1453	2762
Dnmt1	DNMT1-2	M	7582	8929	6880	7936	8228	4150	4074	6449	6579	5192	3908	5341	7103	8775	7757	6059	7929	2574	5033	4071	8425	8476	7483	10654	10963	8667	8086	9105	9314	9958	9780	8462	10380	8078	11398	7652	6250	3851	5938	5059	9799	11760	7820	9102	9843	9716	9944
Dnmt1	DNMT1-2	R	1081	812	1157	728	1265	645	1107	1200	1920	1232	885	3077	2303	2600	1361	2602	6708	4889	5308	4528	1120	722	1272	940	1568	1092	1606	1495	2475	1846	1445	3388	2626	1477	1433	2137	3795	6690	4701	5013	1042	956	1266	894	988	1054	2395
Dnmt3b	DNMT3B-1	M	3703	3831	2572	4232	3825	2344	1364	2266	2147	1853	1273	1836	2098	3334	3664	4301	3309	4024	2283	6914	3142	3174	2406	3926	3115	3554	1384	2247	1821	1753	2088	1745	2129	2231	3046	3748	2000	4500	2373	6489	4172	3652	3123	4521	3901	4479	2378
Dnmt3b	DNMT3B-1	R	5538	3461	3726	3074	4224	2183	3336	6018	7164	4262	3300	7645	6224	5825	6113	6368	11155	4897	6394	4459	4011	2659	3467	2988	3907	3019	4175	5644	5330	4661	4781	6036	6252	4373	5504	5059	6309	5580	6412	5317	5049	3875	5240	3813	4306	3808	6417
Dnmt3l	DNMT3L-1	M	327	260	335	221	289	186	141	45	123	71	75	412	208	274	402	1844	2000	2512	1488	7728	162	140	242	171	318	175	118	34	109	110	40	341	225	299	359	1594	856	3248	810	6319	266	251	351	295	312	330	73
Dnmt3l	DNMT3L-1	R	6172	3119	3656	2463	2730	1599	3252	6043	8006	2980	2190	6522	5506	4251	4130	5657	14984	6446	7136	5394	4056	1650	3292	2469	3150	2383	3078	4389	5791	3450	3730	5806	5795	4022	4032	4516	7191	8216	8038	4906	5408	2736	4445	2978	2923	2431	5146
Dot1l	DOT1L-7	M	17729	12750	9782	11719	12409	6937	6142	16379	15036	7902	5547	6822	8029	8952	13375	12756	6293	3271	5006	10246	19865	12872	12265	16098	14360	12753	8687	14364	16611	13155	12071	7521	9405	9618	14630	12595	5988	4349	6500	10481	23162	20669	16023	16338	19353	16073	16142
Dot1l	DOT1L-7	R	3858	1982	2080	1611	2175	1068	2445	4266	5734	2518	1748	6575	3862	3471	3652	5929	9308	6429	7245	9607	3612	2002	2544	2037	2676	2229	3648	4059	6296	4281	3418	5344	5004	4024	3231	5423	7750	9673	8917	7460	5140	3117	3304	2229	3653	2867	4978
Dot1l	DOT1L-9	M	3070	3016	2161	2991	2761	1485	1064	2790	3087	2051	1691	1773	2540	3786	3507	2813	1377	823	1063	1528	3441	3054	2108	3548	2882	2209	1885	2943	2998	2446	2516	1474	2066	1712	2835	2091	992	756	1117	1548	3219	3024	2099	2485	2564	2401	2095
Dot1l	DOT1L-9	R	1085	763	1018	534	1135	532	813	1421	1884	1186	891	2975	2324	2678	1530	2366	5241	2728	4039	2758	958	722	999	699	1149	664	1423	1267	1943	1302	1571	2426	2349	1204	1411	1530	2694	2956	3337	2932	1085	623	1114	488	776	912	1709
Eed	EED-1	M	6360	6210	3847	5104	6235	3032	3743	5305	5212	3493	2605	4244	4186	4379	6117	5412	8998	2702	3402	3246	6095	4706	4363	6121	5996	5632	4703	5434	5183	5054	5973	4813	5295	5091	6650	6310	6813	4139	5044	2530	8966	7976	6866	8431	7744	7931	8170
Eed	EED-1	R	1199	806	1186	868	1179	447	1225	1270	1524	1019	775	2270	1927	1256	1336	1632	3914	2364	2738	2770	1194	695	1096	997	1143	930	1331	1462	1632	1547	1521	2372	2068	1700	1462	1567	2330	3573	2788	3118	1653	1166	2259	1308	1140	1176	1990
Eed	EED-2	M	3669	2060	1351	1625	1986	1050	2410	3186	3130	939	988	1665	1215	1421	1939	2750	4662	1104	1191	719	3915	1359	1361	2138	1791	1907	2044	2585	3473	1298	1857	1613	1300	1911	2524	3328	3608	2080	1691	658	3711	2030	1602	2186	1696	1672	2474
Eed	EED-2	R	324	183	225	190	253	81	298	435	514	190	156	460	288	190	222	353	1075	467	505	663	341	116	225	184	200	196	242	288	473	263	335	366	339	268	307	486	877	791	547	588	287	162	234	153	186	147	243
Ehmt1	EHMT1-1	M	10714	11496	7585	10430	11104	6145	6384	9390	8207	6870	4386	5763	6226	8635	10304	8437	9314	4021	4795	9667	9036	8003	7236	11499	10740	10481	6806	9340	7910	8816	8036	4913	5893	7135	9935	8069	4653	4629	3549	6609	10654	12646	9106	12427	10642	11546	8930
Ehmt1	EHMT1-1	R	5294	3780	5555	3685	5432	2436	5382	6569	7473	3920	3660	10311	9041	6871	6783	7301	17934	10729	12674	9846	4477	2988	5590	3968	4638	3858	5520	5343	6674	6283	6635	10951	9352	6991	6619	7187	10796	13759	12444	9595	5732	3603	6562	3962	4680	4061	8212
Ehmt2	EHMT2-1	M	5239	4641	3481	4384	5096	2502	2734	4773	4995	3197	2621	4486	4090	6149	5062	5665	7414	2534	3808	1952	5420	4788	4070	5359	5655	4999	4882	5825	5632	5623	6375	5357	5484	5272	6936	5487	5234	2895	4492	2273	6832	6062	4807	5278	5936	6151	7300
Ehmt2	EHMT2-1	R	523	363	559	300	444	198	312	621	622	381	338	984	949	717	602	778	1977	1876	1706	2806	518	469	621	465	570	372	608	748	881	707	718	1161	1159	630	676	855	1075	2259	1761	2728	703	400	821	417	532	449	662
Ago1	EIF2C1-1	M	11414	15039	10229	14318	12449	7901	7005	8981	9582	8782	5950	6851	7945	12579	9708	11513	8350	4173	4812	10235	12289	13326	12067	20133	17375	16857	12196	15669	13596	15696	13575	11001	11385	12489	16557	12717	6848	6302	5927	10776	14001	22536	11689	16165	15710	19179	17297
Ago1	EIF2C1-1	R	3785	2631	4060	2593	2937	1603	3466	3362	5089	3278	2392	8606	6864	5789	3546	6141	14072	9493	12670	7327	3486	2367	4338	3373	4089	2943	5675	5170	6056	5638	5368	11106	9138	4870	5597	6025	10405	14015	11390	7448	3983	3949	4152	2790	3573	3586	8561
Ago1	EIF2C1-3	M	5514	7841	4773	7018	6998	4260	3174	5920	4679	3994	2836	2779	3092	5005	5759	4890	2999	1903	1823	6848	4840	4422	4977	7678	7166	7626	3224	4668	3665	5448	4675	3332	3348	4496	6262	4417	1665	2068	1303	4925	4965	6454	4880	6965	5581	5905	3394
Ago1	EIF2C1-3	R	3674	2559	3500	1978	3208	1503	3408	4080	4031	2627	2414	6051	5234	3779	4601	3260	7565	5123	7091	5549	2440	1690	2932	2557	2477	2523	3138	3033	3783	4337	3538	5095	4616	3497	3775	3421	4762	6719	6074	4776	2227	1970	3110	1899	1990	1963	3411
Ago2	EIF2C2-1	M	11646	12970	11309	13015	11820	6655	5699	9267	10758	8290	6604	6960	9107	15511	11246	11695	11344	4167	7954	5291	10960	11731	10400	15012	14976	12208	10637	13561	9981	13644	13661	10858	14583	11326	16381	9942	8233	5886	8476	6545	13752	18155	11877	12376	14744	15846	17193
Ago2	EIF2C2-1	R	1067	671	1106	726	1010	495	1197	1156	1996	1322	1116	3487	2340	2758	1406	2910	8264	6327	6692	4000	972	739	1013	835	1351	891	2098	1655	1902	2299	2651	5241	3872	2183	1956	2694	5099	7061	5912	4844	1156	1186	1120	748	1255	1126	3181
Ago3	EIF2C3-4	M	3283	4666	3086	5224	4730	2844	1740	3154	2912	2383	1966	2185	2693	4385	3887	3440	3361	2052	1851	3958	3358	4913	3650	6876	5670	4878	3059	4178	2997	3628	4027	2445	3463	3913	5124	3623	1736	2485	2218	4429	4431	6082	4242	6053	5540	6340	4436
Ago3	EIF2C3-4	R	3524	3637	3513	2755	3807	1674	2631	4210	4745	3094	2553	6428	6151	5784	4775	5377	11667	6069	9192	5476	3180	3243	3983	3161	4467	3339	5213	4903	4842	5195	5641	7371	6969	4397	5665	4835	7196	7335	8263	5936	4117	4221	4639	3197	3714	3546	6965
Ago4	EIF2C4-1	M	2259	2982	1736	2587	2627	1704	813	1999	1732	1332	933	925	960	2172	2119	2439	2366	2283	1253	6624	1811	1618	1516	2765	2813	2846	1182	2188	1542	1645	1709	1312	1036	1601	2472	2329	1091	2562	1618	5162	2683	4037	1813	3005	3020	3899	2133
Ago4	EIF2C4-1	R	8227	6939	7924	6157	7731	3640	7130	8366	9869	6537	4942	11743	10469	9170	9281	10249	19340	10151	13106	7832	6708	4733	7813	6710	7325	6396	8827	8835	9812	9321	8933	12784	12345	9364	8724	8981	12710	13195	12339	7691	9957	9079	10323	7485	7588	8039	13925
Elp3	ELP3-1	M	2519	1461	849	1100	1399	728	1192	1795	1912	1149	847	1063	1140	1263	2036	1858	1638	490	677	1686	2956	1570	1480	2281	2319	2508	1877	2388	2548	1978	2043	1767	1669	1937	2848	2655	1789	1203	1022	2117	2514	1829	1333	1751	1442	1829	1822
Elp3	ELP3-1	R	919	517	575	427	632	240	744	1106	1316	651	481	1495	1253	964	1034	1188	1722	1131	1423	1339	1171	563	1164	759	913	850	1032	1212	1706	1156	1157	1910	1595	1206	1293	1648	1882	2676	2447	2009	1117	642	921	671	832	689	1189
Ep300	EP300-2	M	4491	3621	3124	3415	3691	1857	2230	3991	3511	2326	1715	2041	2300	2810	3566	3435	2045	670	1203	2522	4690	3579	4137	4929	4726	4635	3297	4736	4695	4193	4368	3150	3684	3914	5029	4783	1867	1256	1759	2468	5483	5025	4882	5138	4547	4985	4426
Ep300	EP300-2	R	413	173	215	103	246	105	287	357	482	207	165	612	426	301	292	529	1133	1202	1022	1308	359	188	269	243	332	215	431	534	769	424	405	907	699	505	417	646	963	2012	1342	1974	497	294	414	249	294	253	580
Eras	ERAS-1	M	593	792	777	970	1141	440	100	53	27	15	95	871	817	1249	910	2971	2210	3906	2000	7176	741	899	946	1152	1293	876	275	68	142	64	186	1122	893	1181	1174	2800	2070	5777	2872	9341	622	1193	1300	1108	1454	811	343
Eras	ERAS-1	R	6553	7298	6822	6731	8431	3651	5007	8651	7881	6258	5179	9112	8692	10043	8924	7039	20533	7559	12269	5562	8559	7980	8431	8892	9629	7017	9407	9832	10999	10475	11892	11075	12769	8379	11050	8261	11423	9106	12068	6216	10509	8011	9895	7362	8575	8843	12482
Ezh1	EZH1-2	M	7482	8858	5691	7933	7233	4726	5123	5947	6098	4927	3608	4743	4814	7074	6925	7709	7440	2875	4442	6682	6569	6185	6382	9559	9109	9634	7134	8341	7270	8525	7689	7567	6390	8226	10074	7903	5387	5008	4179	6558	8586	11062	6121	9368	7831	10415	9405
Ezh1	EZH1-2	R	2880	2965	4183	2382	2823	1270	3529	3086	4509	3457	2316	6531	5652	4075	3540	4412	10893	8021	9013	5951	3005	1806	3720	3018	3619	2417	4358	3940	5251	5141	4774	8664	8059	4353	4564	4355	8176	11884	10341	6162	3173	3054	3972	2625	3283	2488	6049
Ezh1	EZH1-3	M	3020	1601	961	1211	1805	850	955	2290	2383	841	565	852	823	928	1320	1734	2232	286	519	875	2143	865	967	1463	1343	1538	884	1979	1949	1281	1246	1006	973	1249	1484	2035	1143	556	624	741	2689	1697	1314	2039	1336	1727	1220
Ezh1	EZH1-3	R	519	180	196	145	254	76	288	494	583	182	97	293	270	205	210	367	1344	479	470	633	331	99	210	140	186	166	207	365	459	225	278	565	306	259	255	432	636	917	544	695	305	187	319	214	175	158	361
Ezh2	EZH2-2	M	12982	10149	6362	7084	7991	3514	4298	8021	7865	4687	3053	5028	5957	4798	7333	6492	15788	6026	6900	2617	9927	6169	5918	7571	7166	5758	4457	6756	7748	6782	6615	4550	6351	5352	8111	7069	8767	8767	7836	2748	12037	10990	7893	8965	7385	7415	6584
Ezh2	EZH2-2	R	2615	1474	2213	1287	2139	1061	2425	2976	3275	1447	1111	2937	2536	2054	2048	3052	6015	2710	2980	3158	2159	1073	1920	1593	1809	1599	2128	2706	3307	2316	2153	3252	2670	2410	2197	3000	3674	3934	3244	2672	2866	1771	2978	1858	2017	1855	3285
Gsg2	GSG2-2	M	8475	10295	5307	8074	9728	3827	5405	7358	7272	4289	3677	6404	7208	7099	9189	9184	13071	7617	8262	18066	8018	7151	5812	10342	8636	7912	6162	6515	7335	7884	6612	6960	5952	8466	10609	10766	7699	13064	10096	16166	11246	12808	6826	9844	8322	8840	9066
Gsg2	GSG2-2	R	18734	15912	18280	14329	17911	9737	16116	19419	21701	15677	11584	26747	21607	21257	21184	21974	39943	23504	26998	18578	15759	11271	19988	17222	20494	18321	21536	22063	23185	23692	23316	29584	28237	22265	23676	19634	28163	30792	26805	19678	20410	17809	25376	18762	20815	19733	31781
Hat1	HAT1-1	M	7110	6917	4421	6000	7151	3305	3250	6216	5821	3679	3578	5528	5910	6831	8081	6879	12292	3697	6357	4781	8403	7478	5591	7413	7760	5878	5567	6272	5755	5688	7251	5311	6976	5813	9391	6462	7358	4803	6458	4556	10396	8732	7298	8022	8110	7706	7845
Hat1	HAT1-1	R	2145	1301	2210	1385	1971	1027	1086	2650	2738	1791	1232	3392	2913	2724	2057	3490	5518	3646	3485	3911	2015	1504	2530	1834	2051	1771	2132	3001	3318	2670	2712	3024	3218	1981	1861	2920	3106	4180	3494	4774	2357	1594	3043	1892	2275	2286	3195
Hcfc1	HCFC1-1	M	4063	3714	2859	3100	3461	1896	1710	4177	4854	2800	2217	2857	3689	4987	4574	4593	2025	520	1501	1437	4244	2898	2404	3423	3213	2087	2297	3602	3833	2879	3146	1826	2701	2089	3674	2845	1268	493	1246	1220	3959	2827	2980	2614	2720	2665	2415
Hcfc1	HCFC1-1	R	184	117	180	108	128	77	159	283	419	169	129	655	414	404	248	473	1416	724	956	1264	190	78	88	91	117	83	147	184	345	156	214	357	300	138	192	265	504	706	592	734	174	82	139	50	110	121	159
Hcfc1	HCFC1-4	M	4080	4045	3369	4011	4390	2175	1859	3901	3700	2780	2151	3245	3587	5133	4404	4349	4569	1481	2736	2061	4106	4092	3386	4289	4618	3346	3270	4401	3492	3575	4908	3542	4489	3426	5090	3658	2737	1611	2915	2462	4981	4567	4278	4100	4260	4797	4285
Hcfc1	HCFC1-4	R	232	129	209	120	201	97	160	228	328	200	162	624	516	296	240	391	1796	1303	1278	1166	199	153	243	175	246	150	333	280	277	274	314	630	549	211	247	365	894	1473	1214	1369	237	160	239	147	239	204	412
Hdac1	HDAC1-3	M	4542	5722	3385	4491	4725	2791	3050	3642	4002	3236	2232	2962	3244	3349	4783	3494	4864	1175	2383	1063	4377	3399	3093	5599	5025	5438	3360	3886	3987	4805	4302	3346	3607	3866	5299	3733	3487	1693	2257	935	6450	6906	4575	6906	5479	6228	5446
Hdac1	HDAC1-3	R	419	385	515	333	416	221	431	581	569	374	278	742	676	462	470	552	1051	634	685	906	303	169	430	319	438	296	429	438	484	450	414	723	629	504	435	483	696	1060	942	590	355	372	520	349	378	503	581
Hdac11	HDAC11-1	M	90	78	58	82	101	50	48	85	84	44	32	108	105	69	64	126	226	130	91	478	50	57	75	109	96	155	109	75	94	110	117	182	142	97	138	197	187	284	150	744	117	106	96	117	128	137	92
Hdac11	HDAC11-1	R	162	211	273	241	286	97	251	355	418	179	173	512	650	252	277	366	764	527	614	617	192	149	345	272	258	278	289	319	364	455	378	755	568	422	420	463	589	1120	892	1159	241	227	344	258	291	250	481
Hdac11	HDAC11-2	M	2745	1299	947	1172	1502	1004	619	1980	2016	979	531	936	783	1320	1418	3165	3654	1224	1519	4196	2553	1512	1387	1762	1994	2407	1134	1984	2162	1652	1177	955	1067	1342	1561	2318	2426	1750	1198	3791	3512	2576	1759	2274	2362	2928	1924
Hdac11	HDAC11-2	R	4027	1910	2266	1727	2206	1367	1764	3951	4370	2057	1231	3852	2763	3062	2594	5615	8750	4320	4826	3960	3563	2072	3179	2710	2983	2357	3335	3999	4837	3296	2865	3792	3237	2776	2298	4112	5031	5427	4116	3817	5066	3817	4618	3418	3756	3139	5474
Hdac2	HDAC2-3	M	3302	2946	1820	2469	2644	1292	1370	2625	2337	1174	976	1167	1261	1720	2243	2426	3762	409	811	660	2575	1978	1588	2552	2135	1951	1538	2117	2023	1462	1785	1191	1453	1568	2547	2238	2052	578	972	908	2291	1665	1327	1753	1499	1305	1414
Hdac2	HDAC2-3	R	757	588	682	400	651	324	494	1019	967	482	347	882	743	639	669	916	2009	910	1039	1032	642	435	627	418	585	402	632	965	965	649	745	952	937	620	833	956	1224	1226	1297	973	630	301	578	329	371	384	481
Hdac3	HDAC3-1	M	3656	3780	2581	3284	4002	2100	1945	3128	3123	2482	1781	2974	3205	3823	3790	3392	6055	1974	2769	2220	3657	3172	2701	3705	3751	3458	2774	3335	3252	3584	3650	2959	3386	3065	4180	3268	3399	2090	2590	2135	4225	4050	3190	3896	3891	4174	3656
Hdac3	HDAC3-1	R	783	587	832	525	803	381	643	1078	1076	624	552	1546	1265	1014	1064	1309	2497	1851	2324	2209	587	506	821	653	699	525	855	935	807	794	1122	1633	1452	889	1020	902	1363	2223	2055	2109	699	501	1095	612	756	592	1212
Hdac3	HDAC3-2	M	2053	1819	1163	1443	1750	916	1336	1623	1831	1237	982	1504	1516	1686	1914	1821	3315	942	1367	1221	1991	1454	1425	2076	2317	2076	1863	2005	2174	2276	2149	2074	2142	2249	2737	2096	2581	1553	1895	1532	2836	2681	1726	2156	2134	2591	3054
Hdac3	HDAC3-2	R	457	307	521	307	403	195	415	586	552	386	257	868	666	509	527	648	1445	1212	1112	1454	420	248	561	372	499	467	614	719	726	728	603	1177	941	636	697	781	1004	2172	1357	1411	512	439	717	430	483	488	755
Hdac4	HDAC4-1	M	3488	3105	2042	2840	2687	1755	1785	3952	3401	2399	1755	2140	2079	3524	4136	3375	1677	1000	815	3269	3578	2527	2202	3628	2907	2944	1921	3186	3689	2572	2299	1590	1679	2290	2777	2618	1164	1430	966	2902	3737	3212	2360	3477	2356	2972	2397
Hdac4	HDAC4-1	R	2239	1082	1461	866	1459	670	1684	2294	3476	1911	1393	4335	3939	2866	2716	3266	5594	3514	3852	4263	2071	970	1186	1041	1373	1121	1761	1902	3910	1813	1712	2942	2622	1800	1750	2412	3629	4289	3608	3166	2065	1031	1567	904	1044	1123	1904
Hdac5	HDAC5-2	M	1552	1439	652	1056	1203	716	1456	1367	1247	649	725	1007	841	1089	1581	1510	1502	508	583	1340	999	648	556	1105	1090	1093	1113	1057	1069	692	1172	973	767	1192	1357	1309	828	760	463	779	1449	1397	861	1455	1199	1426	1672
Hdac5	HDAC5-2	R	703	541	929	446	557	280	636	853	1009	612	287	1333	1172	574	634	819	2251	1762	2032	1990	640	299	699	501	591	424	550	718	967	824	770	1427	1158	699	685	829	1395	2481	2169	1847	676	511	996	639	555	575	829
Hdac6	HDAC6-2	M	3786	3234	2348	2819	3555	1798	1403	3165	2889	2160	1676	2323	2459	4292	3735	3934	4323	2270	2582	3949	4305	4101	3041	4019	3845	3173	3090	4106	3325	3747	4300	3035	3552	3193	4548	4068	3092	2647	3108	4855	4688	3998	3142	3696	3956	4293	4088
Hdac6	HDAC6-2	R	841	782	849	757	869	441	591	1155	1127	782	592	1921	1766	1412	1011	1587	3919	2175	2666	1647	1208	823	1142	958	1415	911	1134	1390	1502	1329	1546	1816	2483	1307	1427	1371	1957	2531	2699	2226	1429	814	1453	826	1134	792	1666
Hdac7	HDAC7-1	M	3619	3448	2649	3079	3745	1826	2463	3555	2933	2304	1598	2783	2490	2475	3607	3058	3375	800	1385	2124	3708	2606	2902	3662	3754	3762	2935	3700	3513	3655	3699	3012	3220	3377	4059	3834	2101	1412	1713	1965	4308	3987	4014	4384	3959	4254	3815
Hdac7	HDAC7-1	R	649	408	538	302	482	227	617	739	870	383	379	1169	1057	684	786	922	3661	2547	2310	2743	475	249	560	322	450	377	598	566	653	515	722	1498	1030	768	817	908	2186	3689	2758	2068	723	363	944	423	414	429	851
Hdac7	HDAC7-2	M	7295	7769	5580	7812	8415	4243	3107	7177	6332	5256	4073	4998	5478	9200	8220	8064	6244	2357	3101	3952	8921	9214	6515	9285	9288	7364	6450	8834	5471	8439	10150	5433	7294	6359	9251	6360	4264	2331	4201	6199	10478	8966	8679	9140	9831	10376	9173
Hdac7	HDAC7-2	R	1762	1834	2263	1265	2374	997	1192	2284	2832	1736	1508	4313	4299	3767	2930	3816	10829	5902	6992	5710	2371	1654	2495	1420	2265	1316	2322	2679	2536	2042	3282	4601	5322	2843	3261	2999	6271	7813	7613	5974	2674	1753	3481	1617	2244	1751	3172
Hdac8	HDAC8-2	M	981	671	521	606	661	464	568	1083	978	528	417	761	586	739	1033	1627	1034	945	470	3732	820	364	542	655	591	597	554	740	908	547	730	592	492	639	655	1283	615	1134	538	2733	724	556	434	648	580	641	617
Hdac8	HDAC8-2	R	621	320	437	262	386	191	474	968	1105	464	284	1078	698	533	640	1161	1376	818	1091	1549	503	193	373	312	354	381	520	662	926	479	499	1175	631	548	422	913	923	1281	1156	1454	436	270	327	329	407	265	431
Hdac9	HDAC9-1	M	2596	405	309	248	294	335	406	1416	1947	357	274	541	380	432	694	1981	788	299	324	2832	2185	263	168	252	260	373	329	604	1099	409	418	283	326	382	584	1378	618	586	409	1724	1807	462	312	377	551	567	609
Hdac9	HDAC9-1	R	1810	282	470	182	288	152	420	1857	3570	414	264	1074	631	405	632	1927	1472	935	1025	2330	1552	205	296	176	292	209	418	941	2331	487	417	768	516	401	484	1301	1110	1305	978	1589	1371	377	433	286	512	308	850
Hdac9	HDAC9-2	M	2203	1762	1400	1315	1534	1026	1207	1772	1982	1422	951	1247	1240	1490	1826	1687	1734	498	674	1779	2058	1074	1337	1964	1716	2119	1359	2063	2444	2177	1697	1610	1464	1850	1953	2125	1619	769	648	1277	2110	1973	1607	1966	1541	2254	1746
Hdac9	HDAC9-2	R	644	465	582	363	486	229	752	846	1092	606	440	1335	1068	679	796	898	1736	1178	1510	1477	712	299	535	486	550	465	743	810	1431	800	821	1244	1024	729	768	1023	1353	2421	1608	1297	722	439	551	417	430	482	878
Hesx1	HESX1-1	M	140	53	63	28	57	12	17	16	34	3	3	67	62	37	54	412	171	414	236	2281	206	88	149	123	95	104	31	33	48	20	60	322	183	258	256	1275	234	1111	423	2624	102	183	76	88	104	132	23
Hesx1	HESX1-1	R	2742	926	954	404	811	263	813	2460	4027	827	603	1448	918	874	1135	2474	2222	1334	1627	2459	5570	1185	1590	1201	1454	1532	2121	4600	9866	5846	4525	5744	4810	4585	4972	6199	3299	3931	3690	3683	4897	1560	1768	1281	1460	1401	2433
Hif1a	HIF1A-1	M	13647	5417	3341	4226	4156	2941	6446	11569	13542	4272	3804	6692	3716	5632	7584	13209	8842	2268	3311	3533	12199	3220	2605	4049	3918	4838	5787	7595	9607	5584	6100	5506	4749	7625	7335	12214	7788	4564	4672	2716	14136	7772	3805	5489	6633	6189	12965
Hif1a	HIF1A-1	R	1845	745	883	552	703	429	950	2146	3112	852	663	1870	1109	926	1251	1962	3212	1835	2645	3601	1254	344	761	506	692	651	776	1453	1908	1164	1041	1515	1128	877	912	1527	1754	2950	2131	2222	1630	909	967	608	1070	788	1627
Hoxa1	HOXA1-1	M	1006	1771	1288	1817	1838	741	228	494	97	142	331	1299	1002	1994	1864	4148	3490	4578	2401	10247	993	1767	1255	1695	1582	1138	559	299	268	387	452	1518	879	1364	1425	2936	1561	5666	2140	10373	681	1549	1380	1879	1285	1320	667
Hoxa1	HOXA1-1	R	9894	10481	9983	9940	11494	6285	7068	11356	12348	9299	7615	15312	14622	17783	13031	12796	24906	12365	18011	8960	8043	7208	10241	9055	10875	8641	9868	10824	10837	11600	12221	13386	14575	9999	10771	9531	12483	11454	14621	9114	9354	7963	9567	7145	8372	8644	11202
Hoxb1	HOXB1-3	M	192	350	269	266	244	95	42	25	12	0	30	289	133	197	224	777	569	1019	532	2416	205	240	262	202	392	206	46	7	3	3	71	371	181	208	325	920	660	1348	763	2261	258	542	408	514	449	304	100
Hoxb1	HOXB1-3	R	2500	1885	2104	1828	2453	1142	1808	2886	2786	1868	1523	3159	2931	2547	2922	2897	5820	2792	3540	2830	2521	1817	2434	2061	2636	1940	2630	3112	2973	2849	3380	3579	3588	2980	3186	2637	3538	4010	3604	3101	3720	2468	3652	2604	2881	2992	4101
Jarid2	JARID2-1	M	4617	5075	4110	5109	4757	2723	3080	3707	4113	3302	2610	3626	3677	5258	4188	4749	4808	1834	2987	2694	4396	4278	4480	6336	6274	5819	5034	5853	4933	5797	5531	5597	5236	5043	6720	4652	3505	2686	3574	3173	5600	7582	4982	5737	5786	6723	7546
Jarid2	JARID2-1	R	722	599	814	572	758	347	724	807	1169	710	507	1742	1644	1301	880	1521	3698	3146	3443	2724	551	496	879	794	821	654	1327	1070	1291	1214	1246	2521	2362	1291	1242	1292	2787	4825	3090	2900	831	849	925	597	839	738	1525
Jarid2	JARID2-3	M	21005	20904	13699	17923	20371	10862	9853	17744	15689	11274	8170	8974	11163	13450	18187	14002	12553	6037	6227	13718	22724	18821	18614	27739	26409	27240	15926	20836	20157	22490	20300	13943	14409	18745	25250	17845	10839	8004	8699	13960	28854	30254	22237	28056	25870	28568	22523
Jarid2	JARID2-3	R	6239	4274	6295	4014	5284	2377	7388	7443	8916	5023	4148	12578	10213	8097	8490	10395	22688	13588	16611	12292	6747	4468	8058	5169	7875	5280	9394	8982	11299	10468	10634	17578	15300	9390	10089	11056	16166	25010	20953	15596	9295	6566	9075	6083	6966	6093	15605
Kdm7a	JHDM1D-3	M	2575	2282	1633	1813	2169	1143	1148	1884	1846	983	761	866	1212	1185	1746	1421	1531	182	611	434	1946	1320	1538	1983	1920	1765	1120	1713	1547	1325	1583	865	1319	1310	1990	1325	877	327	767	302	2661	2507	2203	2392	1976	2380	1800
Kdm7a	JHDM1D-3	R	332	243	249	160	294	111	263	393	488	194	178	465	350	278	315	423	1041	339	446	407	295	130	276	187	204	223	263	340	402	259	308	398	405	284	314	409	625	509	500	361	330	226	461	226	279	203	433
Kdm7a	JHDM1D-4	M	2246	2386	1818	2237	2479	1393	1088	2069	1953	1175	962	1149	1800	1689	2014	1775	1930	295	927	731	2390	2316	2224	3134	3013	2776	1673	2625	1976	2082	2420	1493	2241	1884	2948	2226	1523	658	1319	919	3289	3458	2736	3182	2863	3356	2355
Kdm7a	JHDM1D-4	R	409	346	406	288	435	170	384	635	629	396	302	833	824	533	545	768	1474	855	995	1066	404	336	471	465	541	485	695	677	595	664	712	1116	844	512	655	815	1118	1400	1178	1188	626	460	633	393	444	465	873
Jmjd4	JMJD4-1	M	4738	5788	3597	6031	5781	3434	2027	3535	3857	3270	2335	3129	3169	5261	5581	6095	4894	3081	3841	7730	5852	6426	4602	6899	6252	5794	3554	3961	3996	5118	5339	3136	4413	4312	6358	5301	3869	5028	3126	8644	6509	6300	4241	6221	5718	5791	4281
Jmjd4	JMJD4-1	R	4684	3475	4481	2985	4806	2112	3329	6107	6020	3761	3276	8886	8256	7144	5608	6121	20043	9822	12196	6935	5141	3267	4482	3744	4447	3418	5381	6200	5884	4975	6379	9340	8590	5466	5878	6367	9100	10300	11991	7622	5073	3340	6191	3176	4063	3435	6669
Jmjd6	JMJD6-1	M	2938	2035	1128	1817	1832	1193	1008	1780	2008	1140	877	1021	1127	1563	1566	1950	3480	609	854	861	3113	1721	1384	2417	2164	2597	1303	2068	2898	1941	1856	1183	1482	1513	2091	2032	3227	1078	1193	851	3134	2379	1520	2289	2059	2627	1989
Jmjd6	JMJD6-1	R	274	185	265	154	215	83	187	328	461	180	138	396	297	265	231	490	816	537	581	484	259	138	235	171	202	173	327	408	541	300	276	527	366	319	286	504	687	800	627	580	282	137	239	141	180	165	314
Jmjd6	JMJD6-2	M	13219	10920	5750	10051	11772	6635	4270	8652	9603	6132	5362	6481	7456	10032	10221	10756	16150	4577	5940	5915	13317	10364	6708	11871	10147	11372	6286	8847	8363	8175	10437	5288	6642	7202	10476	8512	8755	5063	5272	4905	15473	10705	8567	11864	10687	11897	8635
Jmjd6	JMJD6-2	R	2229	1762	1994	1529	1847	876	1292	2406	2760	1728	1384	3847	3193	3230	2623	3470	6389	4613	5090	3619	2805	1517	2227	1668	1991	1405	2463	2870	2413	1994	2399	2880	3064	2244	2315	2734	3509	4182	5074	4058	2598	1597	2562	1431	2369	1525	2714
Jmjd7	JMJD7-1	M	3679	2504	1321	2069	2405	1614	2206	2745	2722	1112	1403	3056	1571	2782	2909	4381	4758	3201	2014	3904	3190	2715	1427	3245	2668	2758	3616	2596	2595	1653	2674	3100	2050	2610	3029	3725	2795	4753	2068	3448	4973	3943	2119	3419	3584	3421	5853
Jmjd7	JMJD7-1	R	3149	1561	2368	1534	2364	1109	1304	3732	3338	1885	1157	3348	3085	2758	2287	3590	6525	3491	4573	3163	2988	1633	3077	1798	2626	1602	2430	3663	3865	3014	2675	3379	3894	1873	2095	3304	4813	4709	4135	4000	3240	2533	4131	2118	2207	3049	4046
Jmjd8	JMJD8-1	M	1879	1934	840	1838	1951	860	951	1307	1585	796	902	854	1000	2052	1971	1490	2027	292	697	170	1606	1820	786	1955	1703	1378	1467	1310	1082	1173	1736	1036	1307	1456	2238	1231	1665	356	906	149	1878	2313	838	1820	1957	1943	2209
Jmjd8	JMJD8-1	R	195	191	215	194	215	87	116	185	240	124	127	231	254	277	223	267	475	216	342	230	169	167	174	174	246	148	164	211	170	187	227	303	290	204	235	176	332	266	363	318	226	171	202	182	169	192	217
Kansl1	KANSL1-3	M	6974	6797	5350	6171	6000	3656	4040	6720	5584	4224	3122	4834	5191	5978	7175	5911	7043	2177	3280	3374	5907	4919	5197	6695	6502	6139	4670	6284	5768	5419	6190	4404	5102	5392	6614	5402	3616	2351	2825	2486	7929	7473	7407	8678	7159	7617	6781
Kansl1	KANSL1-3	R	761	594	745	490	638	313	759	813	1071	623	565	2126	1514	851	911	1270	3866	3061	3326	3907	725	423	771	497	622	539	737	773	992	807	888	1839	1576	993	974	1158	1875	3947	3333	3590	898	553	1008	526	675	554	1234
Kat2a	KAT2A-1	M	33592	21650	13130	20984	20462	11824	7782	23253	27477	12313	8306	10228	11895	20520	19361	24574	32468	6466	8458	9929	32465	24035	16469	26894	24198	21925	16772	26877	26122	21892	21718	14484	16466	17264	25129	21321	15988	8666	8867	11050	34341	26445	16319	21875	19690	21030	19220
Kat2a	KAT2A-1	R	2746	1884	3434	2113	2561	1161	2411	3763	4741	2441	1984	6594	4700	4923	3295	5050	17754	10476	10241	6008	3905	2307	3747	2296	3207	2426	4697	5244	4770	3808	4659	7791	8005	3593	4832	4951	9623	11935	11518	9395	3670	2481	3495	2143	2908	2306	6274
Kat2b	KAT2B-5	M	2050	2299	1466	1997	2107	1161	859	1639	1360	958	761	1002	1310	1637	1831	1556	2715	1195	1139	2884	1876	1900	1353	2286	1859	1909	1003	1284	1131	1230	1358	777	1309	1328	2074	1548	1065	1279	960	2583	2485	2639	1799	2444	2008	2167	1433
Kat2b	KAT2B-5	R	1429	1056	1380	1047	1468	528	1311	1670	1912	1071	869	2492	1932	1767	1583	2144	3988	2569	3199	2459	1411	875	1411	1210	1518	963	1585	1526	1963	1642	1829	2347	2102	1457	1747	1836	2035	2828	2770	2367	1640	1220	1733	1159	1112	1249	1942
Kat5	KAT5-1	M	4087	4408	3243	3653	3714	2382	3017	3269	3704	2987	2051	3112	2870	3594	3649	3828	5594	2033	2787	3168	3528	2880	3306	4792	4794	4973	3854	4366	4593	5178	4710	5114	4656	4593	5485	4362	4260	3754	3154	2776	4580	5468	2930	4564	4021	4940	4866
Kat5	KAT5-1	R	853	883	1185	693	850	437	1148	944	1353	800	762	1844	1558	1139	1050	1465	3359	2738	2947	2249	831	432	1142	851	1180	790	1492	1224	1470	1251	1413	2759	2294	1308	1324	1429	2376	4268	3763	2792	840	982	1289	839	932	736	1860
Kat6a	KAT6A-2	M	2462	1401	952	1021	1237	481	403	2362	2083	544	498	478	599	1106	1222	1745	304	179	254	360	4982	2754	1743	2557	2116	1886	1449	4100	5350	3422	3580	2364	2744	2845	4546	4365	425	442	644	647	4339	2639	2037	2300	2188	2221	2067
Kat6a	KAT6A-2	R	244	86	122	70	117	41	65	189	284	89	78	202	205	167	197	341	280	287	270	423	268	121	151	104	123	78	152	189	452	235	278	333	342	183	277	345	301	398	441	500	261	146	189	107	158	116	297
Kat6b	KAT6B-1	M	990	751	550	769	787	408	388	873	811	582	410	364	399	717	844	841	426	259	252	710	1233	865	846	1313	1156	1150	673	1343	844	1003	939	578	699	817	1206	1110	343	509	391	899	986	1075	715	1003	862	981	869
Kat6b	KAT6B-1	R	609	410	431	351	408	201	487	643	897	511	342	984	800	759	692	814	1419	848	910	773	800	447	745	489	627	541	873	851	1052	716	917	1426	1093	833	1004	1077	1288	1548	1532	1032	857	430	578	391	445	452	918
Kat7	KAT7-3	M	23539	19882	13206	18557	21197	11188	10674	21006	19626	12741	7913	10001	12008	16910	18040	18205	19815	4432	7291	7536	25119	17444	15435	23772	20711	20927	13555	20703	22846	19312	17901	11154	13548	16644	21189	17893	15115	6059	9061	6857	26833	24772	16062	22009	19632	20132	17865
Kat7	KAT7-3	R	5673	3973	4937	3393	4229	1940	4976	6485	8421	4214	3285	10870	7841	5980	5428	9216	23345	14170	13495	12809	5098	2875	4880	3286	5083	3899	6018	6726	8541	6246	6130	11131	9310	5782	6770	9116	15214	17214	12610	14140	5699	3788	6454	3248	4043	3740	8211
Kat7	KAT7-4	M	1721	1260	824	886	1068	521	785	1395	1411	637	381	648	648	669	986	1099	1437	248	418	602	2061	887	960	1450	1145	1265	910	1641	1784	1288	1128	959	919	1061	1601	1415	1092	519	583	520	1618	990	907	1083	850	964	839
Kat7	KAT7-4	R	274	148	181	99	182	74	242	274	383	144	108	340	247	126	186	322	951	397	491	434	316	103	215	169	180	166	274	318	422	258	207	455	330	235	291	408	764	841	545	428	229	101	210	131	117	111	167
Kat8	KAT8-2	M	27	47	31	22	31	15	41	35	35	13	20	30	23	29	39	67	51	58	53	1048	23	16	24	24	27	37	23	29	36	41	35	55	44	51	51	80	50	137	63	680	42	42	33	43	29	43	35
Kat8	KAT8-2	R	553	411	536	293	429	165	545	770	764	443	321	969	803	440	564	681	2343	1137	1402	1737	721	219	593	408	514	415	479	755	905	796	673	1314	1125	697	683	950	1447	2158	1651	1493	579	349	628	368	335	364	530
Kdm1a	KDM1A-1	M	2681	2793	1489	2310	2481	1488	1285	2071	1742	1390	995	1208	1411	1598	2330	1624	2046	456	762	1081	2173	1631	1371	2494	2112	2198	1256	1641	1600	1728	1672	995	1226	1536	2104	1578	1101	548	614	890	2717	2623	1980	2776	2071	2512	1761
Kdm1a	KDM1A-1	R	780	594	656	562	723	376	609	741	718	487	429	955	917	630	890	831	1550	846	1020	1104	558	388	580	517	613	471	628	636	811	609	662	797	795	600	687	763	816	1144	965	754	674	542	778	678	608	651	805
Kdm1b	KDM1B-1	M	5523	6780	4028	6698	6281	3646	2281	4052	4364	3928	2617	3673	3866	6846	5427	6618	6549	3163	3402	5807	6536	6868	5848	9128	8654	7586	5079	6576	5392	6177	6005	5270	6146	5772	8467	7000	4890	4811	4470	5983	5610	7876	4315	6024	5941	6846	5911
Kdm1b	KDM1B-1	R	5149	4337	5801	3830	4496	2473	4462	5167	6688	4656	3931	9603	8013	9401	6090	6760	14349	8934	11912	6739	5493	4759	6501	5558	6477	4468	8327	8090	7572	7087	9192	13426	11710	6984	9822	7757	9976	12318	12483	10179	5027	4849	5194	3686	4930	4837	9131
Kdm1b	KDM1B-2	M	11333	10970	7161	10734	11174	6746	3858	9461	11155	7073	5161	6990	7984	14627	10931	14459	12540	4584	6496	9367	10603	10652	7198	11915	11562	8598	7245	8628	6546	7043	8529	6048	7239	7061	10474	10304	5598	5605	4589	11598	10608	11616	8025	9650	10987	11803	9654
Kdm1b	KDM1B-2	R	7072	5055	6548	4934	6260	2951	4218	8378	10982	6137	5062	12411	11033	13225	8430	9122	14740	13006	17830	11495	6024	4027	5730	4506	6135	3363	6332	7525	8199	6196	7593	12362	11370	6375	7638	8107	10576	11433	13774	13352	7811	4100	7308	4561	5458	4966	9356
Kdm2a	KDM2A-1	M	6191	5987	4588	4986	5808	2949	4160	5693	5431	3602	2495	3616	3832	3822	5479	4822	4631	541	1818	1764	5883	4188	4976	6871	6468	6427	4744	6258	5726	6204	5678	4835	4960	5267	6705	5899	4050	883	2860	1491	7911	7865	6722	8218	6693	7445	7289
Kdm2a	KDM2A-1	R	418	254	341	192	266	152	455	413	547	296	236	840	622	446	390	587	1940	1529	1357	1400	346	218	360	270	369	293	437	406	653	435	469	1035	763	526	535	579	1435	2787	1545	1498	491	335	457	298	323	303	767
Kdm2a	KDM2A-5	M	6044	5436	4264	5080	5734	2982	2893	5852	5261	3748	2825	4391	4618	5931	5930	5827	7025	1935	3275	2664	6542	5623	5076	6215	6279	5542	4672	6234	6072	5526	6458	4816	5292	5098	6725	5835	5140	2424	4223	2893	7301	6287	6326	6453	6331	6456	6074
Kdm2a	KDM2A-5	R	387	220	302	206	350	132	254	538	568	273	237	797	628	545	374	845	2968	1368	1448	1480	588	254	298	229	346	197	482	512	712	423	408	785	789	443	460	633	1700	1968	1487	1791	486	231	394	198	285	258	556
Kdm2b	KDM2B-1	M	7276	7060	4056	6038	5586	3278	3342	6019	4517	2734	1986	2602	2485	3701	4634	5287	4579	1601	1845	4801	5160	3870	3076	5777	4662	4927	3610	4231	4019	3603	3356	2269	2763	3546	5154	4806	2678	1982	1535	4406	3649	3308	2525	3481	2850	2815	2514
Kdm2b	KDM2B-1	R	3971	2862	3556	2282	3579	1697	3704	4869	6266	2815	1989	5586	4826	3491	3114	4568	13100	5573	7217	5069	3163	1653	3241	2009	3058	2362	2680	4320	5005	3631	3487	5294	4572	3784	3416	4050	6323	6909	7499	4649	2581	1392	2501	1522	1565	1765	2694
Kdm2b	KDM2B-2	M	6463	7415	5431	7875	7027	4369	2632	5781	5835	4999	3615	3856	4471	9077	7462	7174	6830	1710	3100	2565	6348	7190	5073	8126	8292	6088	4996	6647	4554	6784	7874	4912	6130	5646	8523	5305	3536	1859	2785	2674	8733	9564	6272	6998	7581	8672	6781
Kdm2b	KDM2B-2	R	1163	993	1830	1033	1489	653	1007	1676	2318	1111	1151	3020	2596	2880	1502	2587	6133	4125	4828	2834	1526	1036	1364	1010	1542	899	2008	2094	1955	1825	2077	2938	3764	1525	1906	1875	3737	3843	4401	3576	1606	1279	1928	970	1527	1168	3031
Kdm3a	KDM3A-1	M	25318	27108	17580	26133	25687	14835	11220	19242	19729	15744	11562	14427	17886	23163	22808	20845	27866	11599	14551	18121	25310	23261	19001	31061	25839	26869	17450	21287	20466	20833	21184	17022	18320	19899	25424	21426	17281	16541	13948	18761	30084	34018	23133	30809	28865	30608	24965
Kdm3a	KDM3A-1	R	8330	7713	9532	6115	9616	4215	9641	11965	14207	8043	6850	21325	18912	15422	12718	15786	35205	20078	25809	17932	6528	8967	11512	8285	12044	8434	13696	12461	13189	14977	15192	20440	18637	13759	14199	14307	18019	22952	26207	18620	10712	9906	11932	7820	9483	8455	20650
Kdm3a	KDM3A-4	M	5367	5024	3127	4806	5108	2995	2451	4175	3892	2739	2013	3067	3351	3944	4449	4553	5838	2068	2372	3310	5344	4786	3663	6323	5133	5301	3559	4586	4346	4059	4731	3314	3906	4025	5381	5083	3941	3099	2909	3345	7168	6885	5534	6931	6231	6778	5265
Kdm3a	KDM3A-4	R	2118	1512	1911	1304	2025	815	1575	2899	2515	1447	946	3825	2783	2303	2578	3001	5746	3590	4162	4174	1813	1499	2450	1399	2241	1822	2037	2426	2894	2656	2894	4158	3521	2649	2620	3263	4045	4560	4476	4467	2899	1736	3111	2007	2149	2045	3767
Kdm3b	KDM3B-3	M	1929	1914	1494	1522	1715	927	1234	1886	1662	1140	828	890	1047	1230	1601	1324	927	248	447	949	1837	1223	1506	2331	2152	2428	1384	2141	1773	1970	1741	1299	1354	1857	2212	1760	930	638	813	959	2558	2462	2396	2540	2003	2874	2165
Kdm3b	KDM3B-3	R	273	148	344	133	201	110	324	258	397	205	152	366	370	223	289	309	889	530	591	1003	230	132	358	221	268	219	339	283	338	336	294	668	537	354	331	473	673	1577	856	871	408	224	414	227	224	233	443
Kdm4a	KDM4A-2	M	2495	2314	1454	2195	2373	1464	700	2457	1854	1370	981	1251	1251	2190	2212	2012	1796	442	853	1148	2707	2758	1967	2840	2823	2408	1392	2542	1941	2184	2225	1220	1568	1718	2487	2106	1162	504	927	1168	3482	2940	2793	3299	3129	3442	2254
Kdm4a	KDM4A-2	R	552	331	554	353	449	252	311	621	678	426	271	1007	825	742	664	895	1848	1116	1030	935	581	368	599	349	566	302	564	802	728	596	760	873	959	640	675	781	1053	1269	1066	1470	711	405	762	438	578	537	964
Kdm4b	KDM4B-2	M	9071	10939	7894	11246	11430	6761	5925	7476	7320	6629	4351	5274	6324	8862	8707	7424	8638	4288	3770	6606	9647	10156	9147	16706	15685	15188	9444	11153	9482	12695	12072	9514	9339	11359	13084	8935	8299	6366	5397	7043	12908	18460	11640	15123	17749	18600	15424
Kdm4b	KDM4B-2	R	3599	3082	3757	2758	4057	1844	3768	3187	4698	3204	2762	7860	6222	5070	4405	4836	13947	9710	10198	7439	3371	2676	5210	3437	4820	3808	6479	4882	5808	5420	6035	10930	8787	5449	5830	5165	11070	14134	11630	7520	4562	5195	6203	3689	5247	4631	10186
Kdm4b	KDM4B-3	M	12942	13746	9634	13242	15273	8355	8795	12408	10679	8340	5679	8289	7214	10542	12224	11005	10207	4485	3923	12219	14471	11659	11852	19336	19310	18879	12272	15385	16862	16732	14635	12535	10407	13746	17299	14676	9093	7814	6210	11387	17497	19556	13842	18401	16865	18939	14342
Kdm4b	KDM4B-3	R	5090	3504	4968	3039	4227	2136	5565	6070	7122	3992	3268	11865	9028	5574	6694	6939	20590	12322	16228	11271	5545	3180	6272	4328	5108	4783	7211	6092	10042	6837	7626	13346	12657	8075	7114	8636	16246	20082	16923	11610	5974	4245	7160	3756	5025	4559	9871
Kdm4c	KDM4C-1	M	9370	7121	3937	4868	6028	3347	4018	6869	6952	2833	2502	3186	3044	4692	5342	6688	10713	1821	2149	3137	6481	4197	3521	4845	4919	4738	4454	5279	5307	4339	4751	3468	3718	4903	6046	7118	5378	2854	2786	3167	7443	6429	4235	4901	5236	5671	6356
Kdm4c	KDM4C-1	R	4632	1856	2567	1503	2012	965	1664	3926	3851	1282	857	2243	1921	1972	1803	2975	7466	2607	2868	2347	2496	1076	1819	1383	1750	1469	1722	3033	3421	1959	2053	3094	2484	1907	1955	3499	4932	3907	3366	2610	2634	1754	2174	1314	1761	1631	3035
Kdm4c	KDM4C-3	M	717	442	265	418	424	288	139	497	571	173	162	200	230	308	390	483	884	141	125	170	772	671	429	652	505	572	297	670	568	258	271	90	182	203	338	359	593	145	141	128	933	694	383	549	400	512	315
Kdm4c	KDM4C-3	R	412	167	185	125	186	114	154	462	577	169	153	398	362	244	264	572	1205	329	412	355	389	278	297	188	307	174	284	554	432	137	206	222	228	143	189	369	733	387	329	228	432	249	299	146	189	119	277
Kdm4d	KDM4D-1	M	89	84	113	78	95	66	33	24	23	32	33	148	97	152	83	351	259	478	232	1055	25	56	110	89	111	82	51	32	20	12	40	268	53	92	163	265	125	695	189	976	35	106	67	69	93	92	38
Kdm4d	KDM4D-1	R	558	633	986	528	664	380	814	583	724	642	558	1326	1027	1170	711	1129	2112	1291	1762	1000	369	306	531	428	709	524	716	649	593	818	926	1602	1284	750	698	674	1140	1247	1345	853	364	455	519	325	553	574	799
Kdm4d	KDM4D-2	M	71	120	88	104	116	60	22	43	60	31	17	172	86	140	110	360	426	965	383	2701	140	149	125	193	171	129	61	78	50	53	54	112	146	135	168	534	311	1405	386	2768	131	152	194	269	264	219	85
Kdm4d	KDM4D-2	R	2155	1258	1318	1111	1582	759	1232	2376	2192	1202	956	2817	2178	2019	1945	2718	4735	2576	3206	2783	2441	1461	1931	1764	2143	1510	2144	2924	3124	2214	2670	2963	3235	2403	2828	2989	3350	3815	4036	3369	2917	1860	2585	1945	2041	1985	3129
Kdm5a	KDM5A-4	M	2896	2784	1927	2477	2626	1354	1938	2583	2561	1322	1393	2447	1787	2601	2489	2992	3849	2016	1907	1281	2775	2062	1729	2654	2599	2285	2657	2594	2431	1920	2665	2446	2302	2403	3221	2817	2460	2733	1933	1373	2799	2277	1648	2078	1998	2178	2852
Kdm5a	KDM5A-4	R	526	409	606	328	447	253	256	630	666	429	194	524	674	388	411	567	1564	468	886	938	467	238	491	412	474	350	334	611	723	575	501	560	821	424	462	516	918	706	976	855	482	318	534	318	351	332	321
Kdm5a	KDM5A-5	M	2255	1460	748	951	1129	712	817	1430	1326	514	421	435	474	677	868	1101	1191	150	249	250	1235	763	638	1125	970	1015	696	1146	1047	792	897	604	635	909	1137	1152	642	295	335	316	1630	1357	940	1206	1085	1309	1070
Kdm5a	KDM5A-5	R	415	197	253	128	198	121	239	338	392	132	97	216	218	148	238	290	804	242	306	245	263	101	215	160	152	138	194	318	379	228	243	303	309	216	283	372	486	445	300	244	262	187	266	172	210	141	283
Kdm5b	KDM5B-1	M	4035	4175	2764	3896	4239	2195	2082	3566	3213	2478	1864	2698	3071	3636	4007	3722	4866	1520	2009	2850	4475	3783	3350	4737	4453	4102	3385	4028	3471	3756	4152	3275	3329	3164	4765	3707	2910	2015	2686	2865	5359	5312	4252	5408	5046	5200	5127
Kdm5b	KDM5B-1	R	1023	708	953	669	1006	363	856	1248	1396	817	698	2000	1462	1491	1169	1682	4120	2411	2890	2207	1072	638	1108	770	1075	838	1213	1292	1726	1307	1262	2168	2001	1399	1355	1525	2865	2965	2685	2238	1318	849	1382	729	970	937	1603
Kdm5c	KDM5C-1	M	21389	26332	21453	24873	29515	15049	17934	24113	17066	17051	12889	21096	23539	25568	28325	22727	31939	11179	18002	15677	13201	15322	16373	20456	20800	18861	13908	14280	15892	17297	19038	12654	16966	18410	21572	16728	12358	12817	12247	14914	23063	29490	26144	26730	27374	28223	27790
Kdm5c	KDM5C-1	R	3225	1119	1619	1338	2182	906	1804	2297	4146	1921	1258	5790	3260	3250	2863	3717	12115	8323	8339	8337	5088	2716	4537	3426	4513	3903	5888	6107	6616	5213	6293	11039	7785	5252	6213	6196	11709	14638	11620	9265	5494	3885	5056	3005	4382	3096	6993
Kdm5c	KDM5C-2	M	21947	25192	18846	21610	22808	12061	14564	18618	20349	16557	12156	20128	22232	24923	22130	21269	29487	9491	17787	13475	21726	21526	21733	29238	26942	25155	23647	24681	30370	27350	25351	25662	26235	22654	28660	23453	23141	13120	21029	15484	25112	32186	23583	26079	26000	28090	33401
Kdm5c	KDM5C-2	R	1120	869	1412	659	938	511	1077	1186	1760	1028	914	3922	2953	2166	1342	2431	6189	7001	7249	6332	1119	670	1256	904	1126	1050	1633	1558	2749	1592	2032	4444	3235	1953	1826	1963	3807	9767	5510	5324	1002	1015	1303	757	1084	902	2210
Kdm6a	KDM6A-1	M	6440	4536	3340	4053	4515	2325	2147	5179	4238	2993	2164	2251	3821	4346	4740	4500	5577	818	2828	3606	7900	5988	5282	6505	6906	6203	4684	7586	7343	6178	6315	3286	6376	5849	8237	6857	4517	1627	4077	4325	8240	7342	6233	6533	6283	6768	5921
Kdm6a	KDM6A-1	R	421	217	326	193	257	102	234	436	373	214	184	559	517	366	293	452	1014	1174	1098	1539	400	210	502	310	424	288	573	489	643	530	464	789	875	497	594	752	877	2069	1139	2543	439	322	533	263	278	356	591
Kdm6a	KDM6A-2	M	9552	8397	6281	6527	7978	4288	5612	8103	8921	5197	3555	5386	6550	6179	8513	6729	9756	2124	4962	5044	9093	5990	6610	8837	8990	8964	6180	8740	8997	8583	8190	6373	8168	8415	10365	8394	7636	3942	6859	4768	11290	11145	8957	9806	9627	10630	10503
Kdm6a	KDM6A-2	R	717	499	700	447	564	270	894	972	1048	695	526	1870	1179	858	657	766	3188	2492	2454	2901	652	400	804	648	610	522	1236	984	1349	1070	957	1877	1471	1017	993	1083	2328	4793	2907	2481	965	742	1113	576	837	550	1407
Kdm6b	KDM6B-3	M	10575	10671	7645	10564	9969	5535	4257	8869	7922	6384	4598	4906	5376	9286	8199	8268	5985	1802	2449	3499	11062	10446	8833	12350	10885	9559	7809	10638	7791	9630	10066	5815	6073	6526	10121	8088	3801	1866	3505	3203	13659	14204	10847	13515	12697	13299	11563
Kdm6b	KDM6B-3	R	1516	1142	1238	784	1329	680	1095	1806	2542	1141	984	3581	3121	2355	1855	3344	10867	4315	5399	3503	1594	1164	1301	996	1170	952	1591	1956	2526	1735	1704	3412	3622	2112	1972	2336	5992	6120	5350	4607	2051	1349	2008	983	1325	1120	2987
Kdm8	KDM8-1	M	477	654	286	461	554	272	187	517	404	240	205	253	282	433	632	815	796	367	327	876	701	523	356	589	635	464	325	498	461	452	404	332	393	366	678	665	469	432	461	817	792	724	441	732	722	650	562
Kdm8	KDM8-1	R	434	285	346	270	378	187	236	525	569	308	239	663	481	543	414	617	1630	610	797	487	487	292	389	310	381	273	491	573	579	409	548	671	579	509	462	547	891	742	820	581	593	398	520	327	436	375	608
Kdm8	KDM8-3	M	2069	2179	1043	1456	1762	980	934	1435	1353	1061	734	794	1164	1094	1739	1688	1927	1241	994	3777	1681	1278	935	1916	1842	1722	1253	1379	1299	1661	1648	1169	1134	1437	2097	1956	1560	2293	1554	3446	2398	2412	1623	2515	2235	2513	1672
Kdm8	KDM8-3	R	3801	2995	3776	2912	3270	1718	3524	3803	4521	2562	2055	5137	3872	3516	3822	4057	8273	4258	5100	3959	3032	1831	3781	3284	3756	3214	3900	4599	4518	4395	4496	6279	5258	4671	4547	4723	6089	7815	6086	3908	4107	3248	4525	3625	3378	3716	5877
Lbr	LBR-1	M	2903	2169	1436	1601	2000	912	904	2213	2312	1196	880	1090	1751	1819	2009	1908	4233	743	1775	216	3420	2375	1727	2055	2292	1851	1466	2494	2751	1713	2107	1381	2264	1568	2582	2083	3303	1038	2420	217	3306	2561	1896	1761	2221	1815	1644
Lbr	LBR-1	R	134	76	96	62	63	49	68	158	196	67	43	183	134	131	99	225	481	227	232	199	159	73	116	79	82	62	139	139	236	126	130	199	169	108	96	177	296	291	177	258	127	67	129	44	75	67	111
Lefty1	LEFTY1-2	M	1170	1343	602	1111	1111	602	795	736	890	580	496	762	961	1029	1507	1547	2199	1542	1310	4767	1035	942	594	1440	1308	1233	1098	802	951	977	1184	1315	1281	1030	1834	1860	1815	2804	1887	4366	1900	2122	992	1597	1687	1691	1690
Lefty1	LEFTY1-2	R	1952	2005	2410	1567	2010	970	1948	1991	2332	1780	1289	2644	2339	1943	2261	2017	4175	2582	2798	2405	1674	1368	2035	1987	2446	1857	2445	2562	2574	3018	2817	3634	3319	2942	2968	2212	3035	4215	3181	2147	2574	2327	2671	2499	2427	2499	3610
Lefty2	LEFTY2-2	M	26	32	35	30	35	30	16	4	5	0	6	47	31	36	45	204	138	401	157	1181	23	17	34	20	27	19	11	5	2	2	3	23	34	18	48	108	63	364	154	976	18	40	49	45	34	33	12
Lefty2	LEFTY2-2	R	626	416	577	348	323	229	462	793	980	476	332	1139	865	578	615	803	1876	1266	1339	1541	429	237	532	272	379	252	367	399	558	380	461	751	676	441	454	605	710	1422	1133	1253	543	321	831	405	438	363	717
Lin28a	LIN28A-1	M	656	988	908	930	1172	499	184	99	128	71	153	1463	633	1026	1076	3625	3065	4492	2532	12250	677	1197	1073	1699	1431	1044	319	156	163	92	283	1688	921	1007	1439	3901	1830	6506	2370	11629	1017	2161	2245	1825	1488	1483	591
Lin28a	LIN28A-1	R	9081	6540	7414	5498	7820	3813	6180	9635	10175	6358	4132	11447	9471	8179	7464	8507	17816	8475	12088	7884	9256	5691	9558	8348	9487	8225	9063	10450	12162	9800	9523	12054	10589	8318	8501	8770	11924	12260	11784	7678	10789	9452	9651	8805	8996	8632	14381
Lmna	LMNA-1	M	8146	6861	4691	4621	5570	2116	2934	4775	4978	2267	2609	3387	6063	4084	8016	3902	9619	3813	6101	4740	8056	5441	5846	6437	7238	5103	4252	4927	4989	4061	6472	4586	7978	5172	10652	4078	8689	5507	8964	5537	11851	10041	7603	7062	7886	6545	6685
Lmna	LMNA-1	R	1697	1244	2161	1208	1952	947	1835	2405	2686	1571	1196	3295	2593	2441	2321	2976	5292	4127	3904	5248	1631	1105	2187	1700	2564	1723	2445	2882	3225	2909	2946	4895	3474	3074	2267	3644	4074	7847	4719	5576	2342	1857	3258	2144	2261	2503	3905
Lmx1b	LMX1B-1	M	261	520	444	334	486	198	96	30	37	12	53	548	437	437	475	1507	1375	2230	956	4134	244	553	353	751	685	368	82	26	5	9	144	553	341	541	514	2044	803	2958	1117	4902	340	927	643	597	922	592	180
Lmx1b	LMX1B-1	R	4595	3579	3502	3019	3925	1617	3827	5133	6273	3051	2469	5884	6153	4045	4271	5369	11928	4966	6505	5164	4733	3806	4916	4849	4874	4370	5405	5908	6457	5147	5356	6775	5780	5083	5353	6240	8036	7606	7437	4932	7034	4432	5306	4157	4001	4619	6415
Mad1l1	MAD1L1-1	M	3208	3142	2174	2716	2655	1322	1017	2258	2478	1404	1241	1894	2222	2882	3262	2955	3046	1002	1989	1900	2650	2419	1893	2372	2452	1620	1437	2021	1754	1653	2041	1437	2127	1557	2633	1813	1243	862	1219	1777	3218	2871	2495	2852	2609	2220	2123
Mad1l1	MAD1L1-1	R	1601	1070	1475	1123	1263	654	1036	2087	2420	1329	947	2765	2218	2770	1586	2414	6013	3552	4169	3150	1246	871	1211	986	1153	876	1404	1733	1592	1403	1825	2484	2282	1218	1759	1742	2813	3331	3204	3109	1695	1043	1639	920	1237	1173	1910
Mbd3	MBD3-2	M	5732	2737	1450	2030	2263	1346	2018	4808	5275	1812	1480	2470	1955	2276	3604	4902	3496	547	1280	1216	6412	2495	1720	2757	2899	2499	2594	3560	5489	2861	3172	2530	2353	2720	3629	4764	3379	981	2068	920	7225	4137	2340	3498	4845	3567	5404
Mbd3	MBD3-2	R	550	264	297	181	263	162	271	693	1021	309	210	650	393	318	429	896	1006	582	719	1434	553	223	308	196	280	206	336	529	905	468	366	452	548	329	344	780	699	856	823	972	745	307	405	259	431	289	563
Mbd3	MBD3-3	M	48375	48517	34412	45391	52612	26523	33337	48357	48099	32951	27968	47870	48699	62800	58079	50211	79687	24897	37917	23061	52677	49309	39444	58364	57672	50383	49485	49068	63208	52725	55139	49422	51792	49762	63130	50967	51558	31477	42533	23734	60568	62786	46705	55193	55252	52333	66637
Mbd3	MBD3-3	R	5037	3119	5735	3091	5280	2256	4356	7491	8087	5861	3425	13943	10922	8389	6413	9210	21083	20692	24620	25399	4752	3697	7497	3595	4886	3701	4762	5913	10157	6506	6902	11448	10675	5384	5086	6374	10544	26565	18216	24268	5719	3796	7222	3388	4047	3760	7522
Meis1	MEIS1-1	M	3059	3457	2082	3148	3605	1942	1462	3069	2210	1714	1272	1266	1896	2292	3387	2854	3486	1854	1466	4167	2525	2958	2533	4003	3621	4063	1522	3289	2556	2386	2226	1813	1817	2464	3573	3113	2080	2820	1833	3655	4057	4447	3261	4981	3905	4943	2198
Meis1	MEIS1-1	R	3430	2776	3227	2418	3373	1479	3206	3922	3937	2805	2044	5599	4365	3933	4138	4399	9046	4632	5660	4445	3238	2282	3298	2731	3168	2596	4155	3527	4368	3930	4994	5268	5179	4276	4468	4492	5138	6126	6264	4752	4271	3010	5266	3336	3540	3064	6048
Meis1	MEIS1-4	M	5568	6847	4210	5744	5291	3589	3154	4032	4993	3566	2417	3522	3525	4876	4983	5674	6051	3285	3289	7126	4590	4495	4711	7732	6496	7423	4160	6271	5398	6158	5671	4963	5061	5744	7164	6186	4088	5647	3517	7168	5674	7326	4120	6682	5800	8044	5669
Meis1	MEIS1-4	R	4444	5269	5659	3851	4386	2369	6147	4451	6136	4404	3651	8570	8160	6224	5208	6287	13247	9105	11318	7352	4457	3253	5644	4921	5808	5055	7758	5871	7387	8029	6503	12776	9626	6867	8340	5904	10308	14627	12980	7862	4915	5352	5490	4559	4383	4333	9219
Meox2	MEOX2-1	M	419	1008	799	962	1370	416	230	252	313	158	209	1298	657	847	969	3375	1710	3353	1604	5567	464	671	547	754	966	489	317	338	162	173	415	1015	609	575	928	2144	720	2378	1089	5753	430	527	546	555	864	551	446
Meox2	MEOX2-1	R	6341	4574	6708	4420	6216	3813	4248	7709	9346	6800	4834	9943	11198	11637	6077	7185	18515	8970	14917	6844	5517	3465	5767	4629	6270	3902	6190	7600	6502	7294	8023	9479	10483	6080	7145	5247	7924	8091	10520	6253	4526	3063	4747	2870	4611	3645	5876
Meox2	MEOX2-2	M	105	150	150	115	187	75	60	79	55	55	56	323	101	135	213	662	750	1155	404	4981	152	115	192	209	286	208	80	143	77	98	148	309	147	285	330	832	349	1727	654	4524	177	144	253	172	267	173	132
Meox2	MEOX2-2	R	1641	930	1567	970	1247	534	1496	1829	1781	1075	842	2894	2031	1439	1438	1837	4955	3791	3773	4170	1469	897	1620	1265	1626	1315	2227	2025	2896	2111	1958	3585	2990	2123	1976	2597	3872	5890	4321	4192	2202	1224	2215	1303	1519	1676	3141
Kmt2a	MLL-4	M	8221	8919	7083	9236	9430	5076	4177	10198	8885	6140	5462	6216	7565	12560	11073	9307	4126	2028	2843	3505	9129	9430	7297	11213	10114	8361	7480	10358	9278	7849	9212	5595	6629	7347	10145	7419	2962	2273	2882	4389	9266	9477	8238	9609	9252	9656	9291
Kmt2a	MLL-4	R	1477	1077	1075	713	1244	622	1070	1559	2636	1426	1086	4272	3225	3043	2062	2918	8270	4486	6131	5389	1896	1013	1507	930	1305	853	1727	1602	2850	1858	1944	3169	3635	1560	1785	2127	4398	5600	5497	4824	1547	880	1394	761	1025	1061	2102
Kmt2a	MLL-6	M	2987	2201	1899	2167	2330	1204	1521	3528	2621	1293	985	1001	985	1268	2019	1948	421	145	235	776	2569	1507	2113	2912	2539	2556	1657	3228	2415	1844	2478	1245	1240	2004	2395	2477	289	267	450	747	2561	2241	3212	3730	2457	2837	2046
Kmt2a	MLL-6	R	365	163	198	125	197	96	262	375	479	193	102	414	352	215	276	436	568	384	411	748	296	115	188	154	200	214	262	279	495	324	341	483	396	268	274	449	555	811	566	784	291	178	327	199	192	209	304
Mtf2	MTF2-1	M	1774	543	358	231	427	153	342	853	1137	275	204	280	302	258	410	693	884	289	305	1160	3575	707	477	660	633	726	584	1280	4062	1731	1564	1047	1229	1623	2041	2948	1118	802	652	1716	2903	1042	804	872	618	735	874
Mtf2	MTF2-1	R	616	185	228	80	169	58	215	605	721	132	130	367	334	169	212	505	711	433	478	989	1599	211	346	196	313	314	420	871	3013	1164	950	1433	1254	823	900	2277	812	1533	1123	1558	1204	312	619	253	241	233	583
Mtf2	MTF2-2	M	3827	3132	2071	3455	3039	1565	1140	2480	3242	2560	1993	1693	1968	4212	3422	3638	3455	1454	1692	1637	4521	4165	2817	4543	4762	3869	2896	4362	3230	4254	5040	3410	4559	3626	5527	4082	3023	2592	2279	2687	4613	4491	2277	3152	3456	3559	3844
Mtf2	MTF2-2	R	1930	1330	2422	1502	1897	953	1580	2625	3263	1841	1590	3466	2921	4531	2917	3881	5757	3436	4941	2322	2544	1616	2558	2355	2997	1944	3702	3616	3295	3559	3996	6138	6085	2964	4046	3491	4714	5437	5992	4513	2651	2191	2526	1366	2001	2280	3882
Nanog	NANOG-1	M	392	925	796	954	1016	443	124	74	38	35	107	1033	426	657	955	2794	2891	3162	1745	7655	438	576	786	1036	827	604	145	103	96	0	150	789	749	737	871	3138	1315	4436	1950	7829	354	744	845	944	717	611	70
Nanog	NANOG-1	R	11228	7724	7501	6313	8862	4153	6070	10606	10875	6344	4785	9988	9663	8631	8645	8498	18522	7441	10235	6638	8802	5668	7746	7146	7835	6855	7516	9838	11511	8808	10112	10293	9776	8212	8765	8725	12456	8949	10493	6211	7534	4941	6972	5107	6594	5644	7703
Ncor2	NCOR2-2	M	21016	22053	16808	23502	23087	11976	13365	21962	17557	14179	10408	11540	11958	19490	21310	18590	8782	2591	4182	7998	19940	19893	19871	27183	27056	24819	19389	23918	21806	23845	22750	16217	16675	18990	26004	17935	6444	4255	5593	7849	28833	33618	27160	31213	29651	29543	30099
Ncor2	NCOR2-2	R	3983	2688	2979	1962	3134	1520	3519	3473	5651	3390	2438	8216	6608	5318	4275	6546	21586	11712	13749	10222	3714	2176	3513	2194	3323	2981	4900	3507	5646	4827	5531	9742	8033	6113	4856	6407	15201	16062	14472	10987	6160	4061	4437	2996	3507	3589	7044
Ncor2	NCOR2-4	M	2240	1443	872	1258	1256	776	994	2044	1758	790	629	642	580	968	1109	1440	1472	438	320	813	2333	946	1020	1777	1375	1503	1177	2140	1936	1073	1180	893	697	1047	1484	1673	1331	752	586	1000	1978	1263	860	1521	1183	1270	1323
Ncor2	NCOR2-4	R	1212	431	477	384	402	217	489	943	1223	469	253	852	729	514	448	1186	2794	1086	1081	1184	1291	311	457	464	579	512	748	1079	1569	929	571	973	949	771	723	1183	2899	1468	1296	1296	982	407	543	386	399	444	695
Neurog1	NEUROG1-1	M	436	566	579	436	638	272	88	34	28	5	86	811	313	1063	517	1911	1565	3015	1505	4678	246	522	393	439	536	349	156	30	15	11	114	637	300	426	513	1330	602	2354	1129	4787	259	570	440	511	531	312	186
Neurog1	NEUROG1-1	R	2556	2495	3820	2750	3303	1729	2777	3587	3512	2658	2322	5902	4872	5255	4262	4123	10065	5440	8294	3766	2260	1610	2636	2078	2705	1768	3265	3208	3152	3704	3706	5291	4937	3186	3199	2725	4569	5048	6011	3610	2843	2067	3302	1885	2439	2661	4954
Nkx2-2	NKX2.2-2	M	1125	3731	2090	2623	3999	1604	385	336	414	183	315	2815	1804	2118	2894	7090	6671	8418	8049	20474	851	1906	2207	3442	2875	2147	499	298	329	148	353	2224	2017	2888	2988	7500	2324	12867	5062	20436	1854	4333	5060	3089	3491	3688	840
Nkx2-2	NKX2.2-2	R	24610	18938	20181	18171	20160	11314	19953	24850	27534	19256	14607	32317	28856	28489	25249	23559	47759	23444	30659	17118	20973	16131	20760	19030	22744	20511	22117	26140	27749	27123	26679	30380	29117	22048	23969	19537	29042	25712	28863	14379	27459	27424	22302	23347	22437	23076	39126
Nkx2-2	NKX2.2-3	M	534	1243	1236	1561	807	633	214	184	291	31	127	1427	774	1444	1618	4363	3567	5964	3240	14264	1026	1742	1746	1924	1832	1083	411	254	266	134	533	1258	1250	1363	1923	3903	2463	7926	3276	14845	749	2333	1971	2058	2111	1381	439
Nkx2-2	NKX2.2-3	R	23815	20216	17174	15772	20986	9994	16150	25155	27117	16179	12925	26513	30128	25002	22246	25073	55582	22071	29746	19199	25033	20794	23223	23680	25259	21883	25333	29333	31697	25096	26242	30490	29017	22982	26456	25065	31998	29897	31716	19640	31905	24716	24205	23047	21947	20673	33416
Nodal	NODAL-1	M	363	849	900	859	910	327	87	38	79	124	122	851	505	879	851	2720	1670	3634	1368	7848	359	622	553	708	723	695	200	67	120	86	168	915	421	545	772	2525	1354	3617	1340	7267	407	779	609	808	578	569	349
Nodal	NODAL-1	R	11678	9725	10926	8140	10580	5807	8479	12272	12306	8344	6859	14320	13478	12485	12860	12549	24266	11097	16138	10404	8468	6158	8775	7899	9440	7559	7962	9587	10908	10849	11326	12155	12364	10994	11014	10623	11950	12460	14968	8774	8770	5806	8561	6523	7420	7815	10538
Nodal	NODAL-2	M	509	969	481	692	834	454	102	144	337	185	172	696	700	544	1057	2282	1603	2702	1441	6369	353	630	709	861	767	1014	155	176	213	90	253	813	362	761	821	2577	1373	3519	1764	5710	545	963	1019	1427	1193	1204	440
Nodal	NODAL-2	R	9004	7389	7011	6410	8638	3926	6773	9402	8975	6383	4506	10033	9209	8425	9541	7847	17366	6786	10106	6948	7736	5271	7319	7279	8026	7196	7994	9432	9752	9132	9741	10436	10808	8200	9157	7646	9758	9812	9873	6111	11275	9881	10460	8586	8382	8581	12428
Nsd1	NSD1-2	M	30704	28920	21015	29362	32791	16011	17089	30712	24955	16830	13655	15149	15813	21481	29937	24972	16162	2734	7061	9229	29418	23987	22641	33112	32809	33095	20432	30169	28237	28541	28965	19111	22591	27366	34708	25161	14859	5101	11450	10852	38756	40401	32992	37840	39854	36884	33594
Nsd1	NSD1-2	R	3507	2252	3220	1927	3023	1257	2836	3951	5075	2898	2226	6702	5336	4847	4697	6121	14842	10346	9698	10865	3359	1824	3351	2327	3665	2505	4011	3462	4523	4465	4570	8474	7736	5772	5042	5518	11601	16317	11837	7759	4802	3267	5253	2804	3894	3078	4881
Ogt	OGT-2	M	9842	8196	6433	7705	8998	5065	5064	9736	9855	5895	3937	6893	7017	8543	8335	8726	12272	2635	5981	3466	11082	8399	7786	10587	10312	10114	7356	10091	11210	9788	9374	8043	9103	9085	10433	9191	9179	4527	8351	3721	14337	13189	10073	11437	11781	12130	12647
Ogt	OGT-2	R	470	318	383	213	412	132	421	508	588	335	207	1019	747	509	470	702	1698	1732	1435	1955	453	251	466	308	399	319	509	524	651	493	744	1135	805	539	538	716	1161	2040	1678	2209	560	438	598	330	511	432	891
Onecut1	ONECUT1-1	M	22	35	25	31	25	12	13	0	4	2	5	91	27	36	46	210	200	502	230	1627	29	40	44	51	59	49	11	3	6	0	7	82	43	80	82	267	148	840	273	1762	32	39	62	40	40	25	19
Onecut1	ONECUT1-1	R	391	250	361	213	394	187	453	441	500	359	330	1116	770	531	485	687	1785	1250	1640	1390	418	257	557	330	550	360	721	653	848	536	649	1370	1168	665	596	891	1367	2125	1611	1389	545	341	512	340	369	363	857
Onecut1	ONECUT1-6	M	346	867	1175	755	1584	572	356	180	118	51	255	1439	861	899	951	3274	3087	3468	2183	7907	630	600	949	1062	975	1054	430	168	130	139	259	1345	644	791	1258	2850	1532	4535	2670	7655	547	907	906	977	866	1031	409
Onecut1	ONECUT1-6	R	11821	10711	10315	9156	11466	6223	8797	12005	12546	9672	7145	15467	13813	13492	14376	12376	24225	12579	16828	11438	9171	7973	10110	9706	11750	10430	12144	12215	12935	12303	13369	16225	13795	12195	13672	11460	15296	15146	14767	10955	11232	9905	11515	10737	10109	10544	15461
Otx1	OTX1-3	M	212	352	261	313	390	77	74	58	88	2	63	414	279	455	399	1361	1105	2323	898	3052	309	346	320	368	413	164	170	96	31	26	141	662	417	369	422	1478	593	2521	1015	3814	438	439	560	346	380	266	235
Otx1	OTX1-3	R	3313	1977	2668	1673	3575	1201	1432	3627	4365	2427	1865	5810	5026	4242	3853	4825	10566	5455	6920	5860	3617	1666	3104	1816	2430	1412	2540	4051	3763	3244	4609	4715	5398	2859	4037	3397	5679	5712	6187	6493	4259	1549	3442	1806	3035	2682	3512
Otx1	OTX1-5	M	51	72	64	55	69	22	8	11	17	4	16	78	84	69	67	334	248	775	300	890	115	121	90	67	145	75	44	14	49	11	81	220	139	139	276	608	180	1098	338	1057	116	142	118	113	111	82	50
Otx1	OTX1-5	R	376	157	210	118	217	70	139	421	447	169	126	397	416	310	290	521	869	407	686	410	485	182	213	169	329	140	306	558	831	510	529	579	828	349	447	576	620	761	833	684	428	167	282	141	259	207	484
Otx2	OTX2-1	M	78	179	180	190	259	104	25	11	21	2	27	376	271	206	289	881	792	1565	625	4466	187	200	393	335	372	188	59	75	7	16	45	484	245	347	556	1775	607	2813	1164	5672	224	268	198	219	306	215	90
Otx2	OTX2-1	R	4087	2730	3727	2188	4183	1500	3683	4987	5374	3037	2522	6868	6456	4173	4430	4368	10605	5284	7022	4475	5442	3144	5187	4354	5364	3756	5773	7038	8300	5776	6807	9755	8231	6029	6905	6902	9289	9262	10016	6711	4489	2927	4060	2452	2914	3021	5658
Otx2	OTX2-3	M	74	246	224	274	236	141	19	32	0	19	8	200	174	249	214	717	514	909	389	3314	97	107	208	189	180	241	20	8	2	11	46	221	156	149	291	941	392	1722	537	2997	131	274	191	200	232	186	40
Otx2	OTX2-3	R	3733	2726	2643	2419	3130	1650	2926	3905	3197	2136	1868	3789	3581	2594	3469	3298	6378	3210	3834	3935	2984	1626	2501	2477	2743	2348	2512	3105	3211	3195	2935	3771	3248	2983	3485	2648	3671	4176	3979	2893	3648	2727	3102	2901	2356	2947	3545
Padi4	PADI4-1	M	1211	1572	817	1145	833	671	358	456	649	598	446	972	908	1398	1305	1777	2672	1593	1222	3957	1394	1321	1090	2117	1077	1435	662	844	800	1471	1107	1438	1343	1491	2367	2361	1911	2849	1362	4353	1899	1984	1350	1725	1271	2027	979
Padi4	PADI4-1	R	3853	5307	5092	5824	6951	3095	4301	5550	5524	4843	3626	8456	7352	8371	6057	5935	9556	6469	9522	4675	4800	4296	6028	5303	7192	5178	6323	7007	7002	7493	8045	10060	9540	7059	7104	5953	6205	8355	9463	6545	4920	7112	6105	5218	6207	6286	8927
Parp1	PARP1-1	M	6708	4377	2798	3614	4320	2082	1868	5099	5572	2577	2053	2633	2793	4187	4114	5638	9120	696	1950	886	9614	4914	3339	5117	4877	4095	3882	6990	6479	4842	5184	3512	4189	3629	5871	5841	4433	1110	2239	1082	7184	3624	2852	3357	3334	2903	3063
Parp1	PARP1-1	R	672	315	436	267	504	179	331	646	940	350	296	935	757	628	467	912	3339	1376	1582	1145	872	355	521	440	480	360	647	895	1016	621	599	895	866	491	685	929	1977	1761	1452	1118	619	279	421	210	334	230	491
Parp10	PARP10-1	M	2870	2972	1751	2407	2442	1526	1738	2624	2128	1573	1017	1261	1299	1628	2469	1867	2562	944	794	1932	2470	1672	1553	2812	2570	2466	1422	2009	2140	2140	2016	1353	1454	1836	2310	1785	1627	1293	779	1631	2531	2746	2036	3054	2323	2932	1756
Parp10	PARP10-1	R	1273	761	1298	754	1207	470	1395	1323	1708	1022	769	2419	2062	1310	1397	1778	3448	2339	2856	2993	980	562	1144	812	1008	974	1271	1437	1423	1365	1445	2206	1903	1541	1368	1878	2117	3143	3130	2263	1016	730	1243	721	928	983	1715
Parp10	PARP10-3	M	13322	13470	9542	12153	13601	7380	9181	12345	11880	8982	6355	10369	10459	11262	13551	12026	17680	5476	7932	9226	13425	10949	10584	14351	14574	14261	11631	12432	13885	13085	15086	10979	12418	12782	16036	12685	10911	7761	8343	8907	16808	16333	13477	16554	14745	16697	17194
Parp10	PARP10-3	R	2576	1627	2444	1548	2304	906	2161	2887	2924	1571	1531	5275	3498	2880	2928	3823	9330	7511	7346	7840	2482	1443	3110	1966	2502	1716	2997	3197	3653	3385	3046	5852	4692	3358	2988	3781	6723	11807	8618	7930	3303	2102	4111	2116	2494	2093	4151
Parp11	PARP11-3	M	2367	2655	1557	2421	2662	1375	1086	1914	1834	1288	1093	1422	1434	2194	2358	2032	2082	972	938	1939	1765	1981	1656	2678	2310	1975	1216	1737	1420	1661	1981	1245	1326	1426	1988	1546	999	1143	828	1805	2736	3309	2206	2952	2882	2856	2288
Parp11	PARP11-3	R	1402	1159	1768	1041	1549	717	1281	1796	2046	1399	1155	3245	2616	2362	2257	2377	5159	3183	4042	2909	1311	1016	1504	1176	1410	1093	1744	1528	1804	1775	2060	2758	2736	1369	1860	1971	2597	2770	3186	2425	1799	1719	2124	1278	1141	1439	2941
Parp11	PARP11-4	M	3547	3954	2148	3180	3709	1884	1789	3067	2863	1899	1506	1927	2348	2579	2856	3011	3269	1480	1488	3245	3666	3498	3192	4777	4769	4364	2754	3592	2968	3342	3390	2495	2480	3097	3933	3373	2118	2058	1859	3238	4255	5048	3575	4762	4283	4611	3970
Parp11	PARP11-4	R	1132	1012	985	754	1138	542	1039	1590	1756	937	751	2263	2328	1380	1513	1626	3932	2159	3023	2449	1175	944	1570	1086	1516	1252	1528	1716	1896	1566	1878	2764	2205	1654	1722	1764	2818	3801	3018	3153	1255	1217	1573	1160	1032	1290	1887
Parp12	PARP12-1	M	26450	28970	16117	22306	23404	13704	10706	23104	25340	12688	7366	10867	13765	14973	17667	19635	46436	11413	11287	10685	23991	18301	14222	22067	19276	22509	11299	18545	23734	17998	14986	13433	15780	16189	19881	19915	27740	14289	11134	10899	20840	21373	13444	17022	13460	15541	10217
Parp12	PARP12-1	R	12228	6631	8618	6027	8400	3677	8592	12486	11930	6182	4381	11771	9449	7248	8459	12250	21910	10205	13976	11050	8071	3898	7498	5764	7617	5646	7472	10661	12977	8578	9335	12159	10768	7784	8085	11180	14002	14752	15235	9633	6918	4385	6874	3901	4969	5062	6454
Parp14	PARP14-1	M	11346	13260	7738	12787	11127	6847	4485	8671	8640	6753	4331	5150	6718	10106	9220	8830	11398	3386	5053	4689	10053	10466	7965	13240	11153	11625	5999	9025	8449	9208	8427	5388	6328	7374	10173	7067	6353	4875	3365	4422	13737	15954	9228	14505	11178	13257	9426
Parp14	PARP14-1	R	3687	3323	4775	3636	4457	1982	4502	4449	5495	3779	3730	8685	7011	6519	5765	5983	9675	9633	9927	7567	3770	2672	3509	3192	3966	3198	4685	4514	5000	4419	4882	6365	7015	4731	5299	5207	6093	8366	8731	6833	5171	4340	5780	3699	4578	3878	7800
Parp16	PARP16-1	M	51	15	23	12	20	6	16	18	28	12	9	20	22	14	29	38	77	85	51	479	47	21	33	35	45	41	23	43	78	18	29	39	45	49	71	99	50	227	85	589	58	33	34	31	39	50	35
Parp16	PARP16-1	R	138	62	89	33	67	14	128	178	200	60	47	225	116	92	96	211	349	359	275	683	156	43	146	77	148	112	189	273	389	178	208	409	311	222	236	391	408	877	581	775	194	66	182	110	97	100	289
Parp16	PARP16-2	M	1229	431	488	393	702	266	477	802	1092	273	307	570	485	421	805	1213	1377	1210	696	4491	1265	397	482	594	689	571	625	668	740	330	576	679	795	808	998	1294	1051	2476	1566	3533	1605	886	719	700	1091	763	945
Parp16	PARP16-2	R	2567	948	1433	831	1466	700	1747	3336	4058	1349	1127	3276	2487	1433	2125	3055	5878	2922	3159	4225	2691	880	1865	1308	1744	1412	2049	3122	4136	2324	2393	3169	2577	2092	2195	3742	4008	6218	4438	3703	3702	1774	2972	1519	2435	1870	3274
Parp2	PARP2-2	M	19479	17065	10179	15221	16968	9699	11381	15278	18212	11652	8470	13933	12745	16178	18692	17596	25189	7639	10734	12641	15665	12563	10579	16032	17166	16373	14663	14762	16447	14719	15126	13694	14185	15166	19039	14954	13462	9160	10387	12225	19503	20344	13043	17006	17971	18709	20760
Parp2	PARP2-2	R	5922	3991	6322	4039	5825	2730	5463	7459	9322	5391	4158	10204	8562	7816	7924	9219	17905	14327	15822	12728	4433	3171	5853	3958	4869	4429	5548	7054	7752	7533	7632	10477	8990	6124	6728	6938	12021	14788	14320	10678	6715	5030	8199	5185	4891	5202	9310
Parp3	PARP3-1	M	19332	20418	14459	21712	23706	11940	11736	17384	16940	12614	8632	15082	15534	20307	18207	18775	29160	8163	12566	11616	20807	19732	16611	26559	24815	23562	15368	18259	19873	21530	19535	15761	18486	20585	22494	20942	17047	10587	12849	13528	25446	25320	20927	27824	24367	24819	21979
Parp3	PARP3-1	R	2828	1872	2462	1509	2724	988	3261	3660	3817	2018	1903	6007	5116	3312	3475	4932	11154	10245	9859	13062	3131	1804	3310	1920	2549	1925	3829	3898	4044	3507	4039	6224	5498	3271	3987	4371	6916	14869	11240	11120	3544	2485	4069	1605	2312	2268	5347
Parp3	PARP3-2	M	4238	5358	4236	6047	5913	3213	2284	3978	4659	3566	2515	4343	4499	8329	4667	5851	7048	2950	3697	2504	4448	5331	4156	7041	7255	5141	4575	5160	4036	5512	6317	6328	6924	5381	6842	4919	5283	3205	4860	2960	6325	8246	5206	6477	7813	7260	7803
Parp3	PARP3-2	R	713	588	919	542	614	333	570	947	1236	655	635	1465	1239	1542	807	1324	2727	1765	3177	1896	801	532	751	482	740	403	989	946	967	1056	1272	1799	1828	921	1146	1009	1504	2506	2052	2534	1085	670	970	421	825	699	1423
Parp4	PARP4-1	M	4289	3692	2943	3679	4209	2168	2124	5186	3721	2547	1841	2451	2270	3913	3631	4293	2874	1093	1476	3080	4919	3838	3928	5237	4767	4759	3168	5497	3803	4875	4691	3074	3498	4460	5721	3738	2441	1542	2474	3440	6026	5249	4686	5469	5125	5485	4527
Parp4	PARP4-1	R	891	357	587	327	644	222	500	867	1244	522	412	1192	885	821	783	1329	2199	1681	2093	2508	783	446	743	503	655	437	688	1044	1312	973	994	1623	1532	943	1172	1290	1407	2421	1977	2372	1074	510	937	501	630	646	1053
Parp6	PARP6-1	M	5138	4229	2943	3724	4349	2706	3528	4261	5372	2962	2321	4044	3081	4038	4966	4609	5901	2120	2428	6121	5801	3859	3539	5569	5598	6432	4767	4440	7417	4993	5021	4907	3986	4690	5245	5945	5408	4312	3152	6378	6341	5476	4211	5654	5522	6151	6020
Parp6	PARP6-1	R	2139	1674	2233	1219	1854	914	2114	3281	3376	2037	1325	5167	3992	3003	3014	2950	7978	4842	5525	6061	2868	1390	2603	1891	2675	2051	2861	3360	5017	3199	3366	5949	4816	2834	2994	3761	5826	8974	6911	6250	2805	1829	2671	2007	1869	2179	3367
Parp6	PARP6-2	M	5420	5046	3642	4776	5385	2977	2907	4397	4244	3001	2468	3333	2730	4240	4270	4816	5774	2156	2234	4654	3981	3337	3401	4472	5010	5180	3028	3956	4438	3763	4181	3063	3160	3757	4683	3955	2826	2282	2045	3579	4622	4774	3568	5182	4693	5702	4444
Parp6	PARP6-2	R	2674	2126	2769	1707	2671	1364	2721	3196	3546	2274	1773	4467	4304	3276	4027	3790	8457	5127	6180	4549	2233	1196	2506	2411	2513	2197	3030	3208	3609	3261	3468	4906	4141	3103	3251	3065	5309	6385	5346	4915	2439	1887	2952	2096	2425	2399	3700
Parp8	PARP8-1	M	2323	2770	2180	2950	2542	1602	1347	2046	2126	1834	1261	1639	1825	3082	2407	2274	2504	841	1039	1308	2396	3063	2492	4111	3606	2835	3083	3088	1909	3031	3079	2397	2914	2224	3421	2248	1888	949	1435	1683	3259	3752	2717	3019	3276	4119	4080
Parp8	PARP8-1	R	648	614	797	447	733	277	447	552	816	574	584	1513	1371	1021	759	1346	2479	1632	2549	1330	706	610	788	632	848	474	771	1028	756	829	1287	2021	1617	850	1118	972	1686	2531	2721	1991	840	761	778	444	685	777	1415
Parp8	PARP8-2	M	11880	12631	9281	12932	13520	7846	5626	11642	11875	9497	6699	9635	10223	15749	12718	11692	13152	4087	5945	6128	15746	15346	12293	17780	17442	15187	12247	16265	13456	15962	16524	11908	13367	12291	18638	14006	9621	5602	6900	8620	13578	14327	10721	12275	12518	13469	12933
Parp8	PARP8-2	R	1245	780	1221	726	1150	489	898	1329	1759	1006	774	2526	2082	1856	1394	1771	4707	3113	3521	2350	1305	912	1714	1059	1309	1005	1757	1826	1845	1750	2206	3247	3546	1826	2319	2684	3165	4478	4559	4254	1147	880	1253	567	957	926	2040
Parp9	PARP9-2	M	3551	3207	1903	2153	2720	1458	3173	3447	3384	1709	1184	1745	1922	1624	2547	2120	3953	1112	1517	1771	2689	1581	1795	2837	2567	3029	2002	2509	2651	2562	2389	2197	2070	2775	3054	3148	3152	2156	1995	1338	3608	3241	2455	3673	2543	3061	2676
Parp9	PARP9-2	R	656	427	848	387	658	253	1089	871	877	380	336	1300	774	429	638	863	1816	1223	1434	2584	556	230	627	448	654	575	679	815	905	707	843	1243	1054	730	733	1166	1106	2734	1655	1607	658	411	965	599	469	611	890
Pax7	PAX7-2	M	933	2820	1428	2028	2271	964	147	94	142	45	144	1720	1032	2215	1996	4836	5545	6852	3751	12699	786	2718	1963	2498	2046	1806	330	183	153	202	458	2481	1148	1662	2223	4661	2276	7467	3167	12262	767	3349	2071	3068	2816	2169	399
Pax7	PAX7-2	R	16394	19953	17559	20324	19713	11919	13061	18408	22084	17446	14141	24015	26176	30330	22596	20811	35460	18323	27877	15096	19049	18214	18187	21824	22064	19161	21434	23329	23670	23731	25778	24951	27283	20288	26130	16635	21521	19092	23330	14736	24682	31095	21766	20871	20490	24820	33793
Pax	PAX73	M	570	643	494	575	776	355	53	37	196	36	74	817	530	811	797	1929	1923	2770	1469	6190	327	668	834	1089	662	843	222	141	250	87	35	1071	622	800	885	2132	1138	3918	1867	6668	657	1081	1177	799	1019	1048	361
Pax	PAX73	R	6959	6419	5662	6221	7689	3338	5221	8213	8519	5867	4366	9203	10182	9798	8275	8522	16505	8068	11070	6857	8209	6901	7258	7800	8597	6886	8406	9360	9464	8928	9729	10975	10756	8638	9957	8406	10597	10659	11151	6991	9767	8562	8701	7707	7781	8382	11853
Pcgf2	PCGF2-1	M	1850	2059	1613	2170	2036	1288	733	1890	1506	1258	1011	1753	1859	3029	2531	3351	3621	2482	1832	6254	2202	2477	2088	2615	2558	2289	1467	2131	1817	2022	2704	1916	2124	2374	3217	3314	1891	3065	1885	7301	2348	1975	2244	2269	2130	2062	1871
Pcgf2	PCGF2-1	R	3795	3138	3805	2821	4148	1752	2958	4848	5848	3481	2807	7699	7189	6363	5221	5537	16169	8125	11748	8842	4637	4099	4434	3613	4790	3039	4890	5363	5757	4853	6001	7863	8091	4842	5161	6201	8931	9945	10980	9584	4349	3405	5794	3004	3911	3066	5490
Pcgf3	PCGF3-1	M	954	788	658	842	677	421	277	613	651	384	296	434	429	494	836	694	946	418	567	1257	614	502	549	630	580	522	290	458	441	387	415	283	492	363	577	460	345	565	409	1042	836	737	681	847	664	646	441
Pcgf3	PCGF3-1	R	613	322	584	375	458	170	447	755	777	404	404	1263	900	825	636	823	2391	1774	1842	1648	446	193	434	242	373	247	418	479	622	428	484	972	922	557	500	538	734	1702	1521	1645	532	319	690	321	390	293	852
Pcgf3	PCGF3-2	M	29377	27675	18765	26891	28798	14046	12331	24483	23198	15099	11241	14566	19477	23859	26494	22533	23925	13713	17460	25107	30942	28035	23925	33626	29982	30357	17854	24938	26628	28597	25153	17504	21446	23495	33700	23784	20353	17632	19846	32005	38611	37475	30656	34557	31649	33795	31008
Pcgf3	PCGF3-2	R	13602	10282	13121	8396	12833	6042	13109	16912	18990	10299	9127	26342	20102	19263	15070	23121	47359	29407	33087	31236	14150	9360	15577	12380	16242	11264	17840	19351	23032	18368	20920	31247	25535	20121	18510	24026	25785	40300	32456	27088	17968	12694	17454	11519	14265	12873	21842
Pcgf5	PCGF5-1	M	2830	2541	1611	2245	2601	1275	1578	2096	2175	1388	1181	1364	1681	2201	2537	2297	3441	1006	1286	1636	2466	2183	1679	2450	2495	2374	2017	2112	2179	1717	2194	1509	2052	2068	3104	2261	2294	1433	1927	1797	3821	4007	2352	3390	3289	3419	3322
Pcgf5	PCGF5-1	R	1558	1212	1512	1089	1378	640	1177	1780	1979	1370	898	2116	1956	1838	1700	2491	4888	2577	3193	2418	1591	1113	1649	1138	1711	1257	1709	1989	2040	2107	2179	2934	2366	2033	1702	2098	2936	3304	2842	2634	2256	1596	2190	1535	1546	1542	3020
Pcyox1	PCYOX1-1	M	4317	4608	2611	4271	4446	2573	1903	3222	3450	2707	1853	2469	2500	3710	4036	3896	6117	1848	2362	3311	4255	4208	3138	5400	4707	4708	2749	3785	3566	4006	3933	2792	3230	3636	4683	3664	3749	2414	2520	3034	5373	6293	3900	5338	4555	5692	4233
Pcyox1	PCYOX1-1	R	1433	1075	1758	1013	1552	574	1441	1954	2043	1287	1200	3173	3020	2249	1980	2131	4552	3174	4162	2966	1355	882	1750	1308	1812	1123	2242	2055	2409	1989	2238	3367	3071	1908	2298	2004	2789	4011	3799	3146	1592	1721	2416	1449	1644	1466	2992
Phc1	PHC1-1	M	7204	7134	4886	6319	7528	4061	5209	6583	5914	3820	3066	4084	4012	5497	6195	6644	4747	2708	2910	10133	7543	5824	5554	9045	8997	9203	5788	7443	6522	7554	7645	4766	4277	6759	8706	8778	3123	4936	2965	10049	10402	9530	7025	9323	8806	9074	8027
Phc1	PHC1-1	R	7528	5947	6507	4712	7045	2863	7406	9132	10374	5028	3867	9980	12233	6968	8818	9423	21094	10999	13881	12716	7733	5256	8280	7450	7316	6924	9114	9270	10304	9092	8831	13424	12197	9142	8957	9988	14743	18222	16441	11813	8957	8095	9254	7200	7213	6113	10769
Phc1	PHC1-2	M	8417	9699	5724	8428	7868	4937	4307	6632	6333	4729	3731	4008	3866	6731	6395	7507	4683	3165	3386	7779	8385	7591	6197	11032	11434	10365	7201	8164	8144	9816	8189	6713	6083	8797	9718	9220	3998	6349	3341	9226	10858	13612	7167	10892	11194	12626	10342
Phc1	PHC1-2	R	6679	5610	7282	5279	6681	3313	6375	7867	8512	5860	4374	10978	8755	8345	8906	9409	20509	11301	13217	8608	6448	4576	7748	6332	7369	6474	8366	9290	10636	9503	10157	14984	13245	9108	11548	10210	14545	16315	15397	9721	8989	8585	10047	7809	7767	7929	13666
Phc2	PHC2-1	M	17428	17405	12069	15142	17643	9470	10836	15329	15261	10712	7568	12004	13173	14451	16804	15026	22347	3574	8341	5493	17473	14824	14750	20691	19595	20041	14007	16384	17103	19087	17651	15125	15753	16795	20444	18158	15472	6138	11205	5554	22847	23236	19018	22148	20103	22125	19475
Phc2	PHC2-1	R	1049	912	1327	640	1209	497	1489	1830	1754	959	891	2980	2906	1443	1522	1648	4122	5204	5115	6456	1005	713	1500	1052	1390	1015	1768	1551	1871	1780	2176	3183	2970	2108	1587	2292	3241	8117	5603	6813	1526	1103	1799	1091	1232	1017	2406
Phc2	PHC2-2	M	7570	5331	3486	4661	5249	3187	2717	5575	5634	3131	2154	3067	3301	3782	4594	5606	7101	1103	2075	1657	7315	5007	4382	6742	6096	6408	3847	5638	6350	4891	4210	3180	3392	3940	4839	5100	4589	1477	1607	1213	9489	8894	5997	7768	6957	7885	6229
Phc2	PHC2-2	R	1398	903	1198	950	1121	590	1292	2058	1748	1046	818	2602	1949	1730	1620	2188	4894	2936	3492	3678	1301	876	1612	1157	1230	874	1834	2030	1987	1658	1745	2665	2432	1558	1538	2164	2589	3509	3273	3006	1775	1463	1888	1288	1283	1274	2950
Phc3	PHC3-4	M	18156	20150	14437	19475	20754	11248	10359	18456	17484	12344	8862	12318	13073	18037	19192	17229	15556	2832	6698	5708	16119	17354	16827	23100	21836	21716	14727	19072	18201	18891	19474	12611	15416	18023	21036	17463	10464	3559	8301	5355	23123	26853	22101	24991	23156	23845	21976
Phc3	PHC3-4	R	1666	1224	1708	1090	1546	716	1763	2056	2505	1417	1084	3676	3355	2412	2070	3123	9908	5564	5735	5530	1513	1213	1918	1273	1584	1354	2355	2421	2594	2077	2255	3729	3151	2028	2272	2764	5444	7364	5766	5312	1856	1730	1849	1361	1575	1442	2939
Phf19	PHF19-1	M	1910	1877	1190	1908	1592	925	597	1277	1460	1377	790	881	927	1773	1458	2034	1622	1310	830	2646	1973	2427	1189	2430	1680	1851	1103	2059	1339	2503	1958	1191	1484	1296	2009	2151	998	1489	707	3037	3046	3353	1878	3039	2180	2537	2136
Phf19	PHF19-1	R	4263	2906	3705	3007	4078	2002	2149	5368	4927	2684	2354	5203	5165	6279	4609	6313	11291	5293	7694	4348	4128	2841	3822	2893	4870	2677	4399	4776	4813	4069	5493	6505	6653	4085	5276	4419	6094	5474	7525	5401	5526	3949	5334	3336	4956	4881	6895
Phf19	PHF19-2	M	1030	1410	886	1330	967	641	491	767	862	755	430	548	592	880	879	1192	1261	939	752	1526	927	1016	771	1423	1061	1193	703	944	956	1141	929	734	606	702	1116	1158	533	1146	665	1676	828	1057	753	1016	725	805	697
Phf19	PHF19-2	R	1516	1336	1491	1250	1730	931	1311	1928	1921	1425	1225	2516	2236	2247	2085	2058	4003	2210	2957	2181	1406	1029	1605	1417	1474	1206	1828	2000	2116	2107	2089	2777	2594	1887	2219	1714	2581	2534	2774	1955	1422	1212	1358	1095	1017	1357	1799
Phf8	PHF8-3	M	27852	32211	24057	32249	35254	18001	16581	29047	19980	19678	15429	22656	24264	36347	30104	28912	37188	16206	19760	28450	32552	35519	29362	41250	39381	34614	26369	32517	27880	35563	35847	26089	29096	30572	38796	29102	20131	19689	19738	30539	35774	43864	33223	38982	38157	38076	38357
Phf8	PHF8-3	R	5152	3819	4674	3607	4786	2352	4376	4999	4923	4189	3340	12015	9549	7650	5213	8477	22322	16217	22120	12765	4849	2985	6443	4137	5356	3921	7545	6229	6640	6548	6370	12775	11910	6971	7128	7883	12513	21631	17863	12871	6474	3935	5075	3406	4481	4542	10723
Pou5f1	POU5F1-1	M	1514	3307	1755	3685	2445	1425	775	1201	1053	705	603	1291	974	2146	1824	3101	2839	4136	2216	7751	1601	1962	1702	3429	2728	3252	956	1412	638	989	939	1790	1340	1646	2429	2991	1489	4923	2447	8408	1629	2954	2212	2896	2091	2522	1522
Pou5f1	POU5F1-1	R	10935	9844	10244	8475	10069	6056	9561	10765	12830	10680	7871	15351	14684	13624	12430	11926	23322	10446	16085	6870	8619	6571	10014	9033	10701	9000	12296	11608	15028	14439	13978	16761	15958	12173	13414	10097	14782	12937	15528	6245	8679	9179	9145	7133	8661	9408	14447
Prdm2	PRDM2-3	M	2458	2664	1596	2687	2531	1496	1439	2110	1851	1331	1197	1174	1338	2099	2401	1901	1748	1006	834	1765	1841	1520	1636	2765	2580	2572	1742	2206	1810	2198	2021	1426	1379	2077	2440	1774	1005	1176	810	1624	2609	3824	2004	3386	2832	3426	2842
Prdm2	PRDM2-3	R	1220	940	1329	856	1152	525	1388	1448	1748	1195	977	2300	1938	1674	1444	2044	3895	2171	2884	2506	1049	739	1372	1014	1157	1028	1622	1696	1672	1598	1718	2702	2547	1621	1634	1657	2208	3196	2959	2206	1673	1634	2068	1183	1338	1442	2704
Prdm9	PRDM9-4	M	1443	1359	787	1127	1213	708	738	1461	1349	583	492	732	619	772	1158	1268	1320	893	691	3887	1544	940	1131	1591	1332	1676	1021	1335	1220	1154	931	778	859	1101	1477	1860	1164	1588	957	2767	1995	2075	1369	2251	1880	2002	1746
Prdm9	PRDM9-4	R	2776	1944	2338	1306	2061	1005	2614	3141	3757	1812	1185	3412	3050	2016	2369	3240	7923	3386	3887	3246	2712	1176	1688	1987	2567	2064	2499	3466	3530	2700	2737	4171	3459	3247	2906	3362	5606	5368	4648	3549	4510	2703	4219	2406	2519	2489	4117
Prmt1	PRMT1-4	M	18522	18970	11059	14929	16333	9456	12440	14411	14536	11492	8498	12275	12031	13628	17053	15347	28594	8512	9803	5011	16874	11703	10388	17431	17140	17228	13689	13834	13269	15757	15744	13365	13150	14706	18908	13697	18066	11679	9655	3732	19326	18672	10687	16539	14890	17929	16819
Prmt1	PRMT1-4	R	5087	4363	6088	3672	4843	2585	4861	5951	6269	4252	3132	8858	7315	5249	5365	5992	11286	8777	11032	11324	3642	2562	5303	4334	4989	4896	5246	5464	5465	5718	5522	8822	7100	5737	5593	5601	7108	11317	10480	9628	4387	4079	6189	3529	4481	4205	7079
Prmt2	PRMT2-1	M	3162	4491	2314	4627	3921	2436	2487	2474	2904	2114	2279	2987	2524	5396	3759	4755	5556	2447	2440	3432	2782	3065	2023	4743	4535	4035	3888	3402	2879	3003	3902	3769	3409	4012	5662	3897	3286	2673	2304	3841	3491	4977	2298	3753	3856	4593	5135
Prmt2	PRMT2-1	R	3159	3536	4826	3241	3548	1972	2541	3256	4215	3666	2493	4946	5262	6120	3633	4794	7698	5263	7140	3859	2748	2628	3919	3109	3829	3031	3855	4418	4553	5311	5031	7103	6282	3797	4300	3544	5084	5880	6652	3992	3047	3665	3318	2555	3062	3372	4880
Prmt2	PRMT2-2	M	7865	7667	3820	7787	6970	4298	3926	4883	5965	3879	3111	3730	4050	6149	6854	6483	9717	3626	3552	9066	6116	5943	4504	8574	7431	8415	4012	5347	5822	5732	5739	4049	4784	5800	7895	7095	6411	4799	3954	7731	8021	10488	6033	9504	7937	10690	7158
Prmt2	PRMT2-2	R	6715	5766	7358	4434	6388	2961	6382	8482	8861	5278	4172	10617	9274	7272	7045	8759	16759	9648	12561	7861	6162	3395	6201	4982	6095	4503	8014	7891	8837	8287	7295	12263	9501	7304	7092	7611	9160	13245	10800	7386	8372	6674	7960	5073	6098	5099	11280
Prmt5	PRMT5-1	M	3831	3870	2773	3505	3579	1791	1643	3107	3493	2373	1651	2527	3164	3884	3460	3686	5432	2012	2891	2530	4323	3803	3039	4678	4744	3411	3011	3696	3165	4132	4326	3882	4098	3231	4594	3529	4051	2745	4009	3478	5480	4683	3636	4076	4359	4946	4475
Prmt5	PRMT5-1	R	547	395	608	360	587	281	487	717	835	458	455	1148	968	1116	789	1012	2399	1872	2004	2161	580	381	677	466	783	447	773	915	727	843	877	1421	1352	766	824	1060	1141	2258	1820	2372	707	397	912	380	531	528	976
Prmt5	PRMT5-3	M	11136	11005	7224	10253	10609	5759	5553	8563	9363	7385	5206	8197	8865	10554	11216	9563	16359	4773	7016	5645	13315	11634	9979	13704	13963	13317	10699	10937	14267	13435	13454	11383	12406	11999	15807	11977	11689	8005	9314	5880	17740	18086	12069	14300	14261	15348	15889
Prmt5	PRMT5-3	R	1699	1169	1730	1296	1649	643	1500	2088	2125	1306	1333	3854	2823	2904	2442	2706	6447	5551	5980	4812	1786	1407	2124	1616	1894	1591	2957	3067	3313	3281	2831	4909	4476	2748	3129	3022	4518	7018	6363	6688	2624	1869	2790	1528	2049	1990	4305
Prmt6	PRMT6-1	M	1601	2020	1328	2178	1880	1181	944	1296	1371	1026	782	1080	1047	1795	1810	1950	1979	1154	881	3097	1250	1735	1426	2709	2694	2699	1674	1457	1404	1430	1370	1875	1650	1997	2081	2105	1727	2150	1302	3515	2338	3413	2290	3185	2523	3465	2337
Prmt6	PRMT6-1	R	3088	2405	2821	2071	2633	1371	3009	2919	3255	2565	2001	4219	3654	3631	3757	3401	7640	4418	5735	2813	3042	2019	3260	3061	3821	2928	3984	4268	3785	4656	4637	5817	5479	3793	4587	3668	5423	7439	6722	3441	4273	3471	3725	2747	3518	3339	6081
Prmt6	PRMT6-3	M	5944	7813	4960	7229	6725	4344	4147	4238	4750	3833	3007	4216	4456	6293	5456	5427	8336	2443	3455	8265	7010	7283	6326	11556	10147	10520	7563	7423	8342	9250	8640	7234	6995	8089	11016	8134	5942	4232	3826	8955	6783	8906	5436	8673	7394	8595	7446
Prmt6	PRMT6-3	R	4388	3831	5165	2816	4219	1888	4073	5316	5381	3795	3234	7765	7047	5566	5371	6140	12801	9712	10692	6935	4409	3131	6012	3875	5894	3655	6064	6618	6305	6254	6172	10568	8519	5928	7778	6732	9760	12850	12157	6512	3764	3491	4497	2782	3485	3585	6630
Prmt7	PRMT7-1	M	7209	6679	3768	6931	6942	3436	3228	5475	4851	4269	3245	4026	4138	6419	7065	6455	10662	3562	4031	4921	7306	6568	4839	7955	8037	7857	5271	6308	7050	6712	6610	5314	6407	6534	8889	6318	7135	5216	4502	6485	9072	8858	5840	7819	7561	7900	7165
Prmt7	PRMT7-1	R	3208	2727	4116	2542	3478	1728	3111	4207	4812	3014	2645	6106	4896	5256	4717	5247	9861	6561	7884	5190	3564	2209	4358	3032	4202	3292	5165	5281	5015	5315	6295	8044	7472	4968	6147	5941	6196	9535	8991	5554	4049	3445	5377	2922	3991	3727	6710
Pten	PTEN-2	M	13506	11352	8447	9667	12029	5858	7083	11544	11755	6697	4844	7637	7703	8512	10783	11641	17601	2249	4910	3052	14553	9392	9853	13093	12358	12251	9244	12678	13490	11149	10688	8244	9119	9614	13412	12370	10098	3608	5622	3015	15047	12303	11106	12833	10910	10910	10244
Pten	PTEN-2	R	932	529	604	301	645	257	817	1068	1177	460	486	1772	1268	841	859	1224	4595	2745	2561	2670	850	407	657	536	680	433	894	1117	1261	914	921	1819	1253	878	851	1310	2598	4318	2854	2416	958	443	870	461	512	429	911
Polr2a	Polr2a-3	M	13647	15328	11048	13515	16045	8212	8734	13782	11413	9790	7370	11601	12497	14228	15898	12816	13726	3850	6857	6846	13602	13188	13932	16904	17066	16166	11997	14530	14333	15377	16282	12454	14501	15052	18362	13752	8942	6040	8581	6836	16786	17630	16461	18210	16609	16545	15705
Polr2a	Polr2a-3	R	1193	956	1421	927	1361	587	1400	1503	1929	1074	1005	3669	2804	1760	1914	2118	7775	6751	6972	6675	1422	846	1673	1003	1448	1080	2069	1538	1955	1693	2031	3881	2802	1757	1883	2205	4381	9097	7258	7377	1402	1021	2047	1002	1095	1002	2250
Polr2a	Polr2a-4	M	37632	39293	29188	37759	43223	22553	22747	37677	33568	26296	19372	32654	33927	42218	44085	39681	43575	11624	21753	23454	38462	37908	33962	42024	41063	39387	30984	38463	37282	38193	42324	31296	35671	35349	44128	37458	23874	14280	20110	19905	48139	48414	46652	49275	45861	45096	44321
Polr2a	Polr2a-4	R	3925	2919	3578	2478	3903	1678	3971	5684	6111	3768	2753	12872	10327	8007	5382	7509	30006	25793	24571	22716	4355	2570	5173	2517	4238	2979	5200	3949	6132	4558	5442	11480	10769	5841	5652	6526	17262	29330	25016	25014	5440	2683	5820	2926	3836	3119	8199
Polr2b	Polr2b-2	M	22244	20290	12896	16589	20712	10149	12563	18620	16065	11110	8476	12900	13723	13840	21142	16891	22136	5000	8004	13669	23516	17201	16541	22882	22644	23100	15926	19066	19166	19524	20523	15500	18689	19594	24675	20715	16144	9701	10596	11847	30773	26108	23783	27344	24301	25399	24983
Polr2b	Polr2b-2	R	4856	3414	5936	3394	4853	2237	5341	6533	7932	4414	3339	10205	7791	5474	6822	7243	17582	12976	13496	12367	5261	2966	6110	4287	6007	4607	6151	6938	8298	6483	7712	11016	9626	6556	7360	8447	14280	22056	18816	14999	7090	5039	8823	5060	5665	5296	9041
Rbbp4	RBBP4-6	M	2334	2868	1737	2373	2340	1336	1348	1642	1826	1512	1167	1820	2075	2254	2359	2065	3521	1156	1839	745	2047	2061	1704	2815	2611	2463	1821	1976	2023	2103	2128	1799	2155	1932	2884	1939	2000	1566	1652	644	2922	3740	2281	3142	2584	3115	2744
Rbbp4	RBBP4-6	R	311	286	344	291	371	208	311	361	340	276	262	540	547	414	354	482	717	638	725	943	247	200	363	275	341	274	402	438	416	398	367	615	526	386	448	414	374	751	547	717	340	394	479	328	391	419	541
Rbbp7	RBBP7-4	M	5669	2581	1465	2161	2422	1153	3769	3814	5354	1315	1535	1814	1609	1806	2856	3691	3666	481	725	1022	4436	1138	1217	2133	2128	2364	3262	3908	4651	2158	3140	2677	2088	3124	4127	5159	3390	1068	1537	795	4228	2410	1543	2601	2159	2384	4223
Rbbp7	RBBP7-4	R	389	157	202	139	172	100	318	362	581	184	119	285	216	164	193	395	486	167	217	465	294	73	122	130	176	185	241	418	489	298	249	384	296	263	268	454	442	579	314	476	293	139	200	149	152	170	267
Rbl2	RBL2-2	M	8896	8509	6155	7804	8687	4686	4713	8265	7507	5692	4102	5834	6662	8128	9113	8749	11435	2505	5234	6460	9242	8030	7352	9781	9340	9056	6945	8800	8648	8526	9112	6407	8422	8109	10230	8726	7108	3574	5893	6367	11221	10088	9252	10573	9618	10464	9605
Rbl2	RBL2-2	R	1584	1080	1435	967	1573	517	1301	1630	2145	1073	894	3724	2608	1868	1771	2359	5984	5489	4899	4960	1659	956	1705	1160	1756	1213	2128	2188	3108	2123	2271	4364	3186	2138	2381	2672	4019	7963	5698	5806	1968	1420	2332	1246	1681	1468	2921
Ring1	RING1-1	M	6241	5382	3327	4334	5248	2821	3314	5267	5438	3134	2240	3544	3400	4570	5125	5158	7993	2184	2780	1996	5258	3970	3344	5018	4999	4753	3760	4590	4961	4448	4914	3499	3826	4283	5277	4703	4453	2566	2544	2057	7389	6941	4633	6109	5729	5907	6088
Ring1	RING1-1	R	745	522	612	339	543	249	510	768	888	440	362	859	761	515	698	861	1976	881	937	805	546	265	582	401	405	381	537	562	688	565	553	769	644	588	591	623	933	889	985	872	625	613	940	621	572	510	1236
Rnf168	RNF168-1	M	2835	1313	770	908	860	466	511	1358	1760	436	319	504	511	502	859	988	2732	573	629	1438	1358	639	660	907	794	739	406	928	1027	575	589	438	575	627	914	928	1043	765	620	1427	1777	1230	903	1097	900	809	622
Rnf168	RNF168-1	R	1377	443	612	387	486	251	689	1475	2077	443	331	1257	982	523	642	1324	4175	1838	1692	1896	899	279	533	365	513	384	588	958	1249	606	715	1093	1012	760	768	1050	1506	3108	1947	2242	1081	508	779	546	437	486	1094
Rnf20	RNF20-3	M	10879	12223	7351	10472	10768	5929	5307	9229	8253	5555	3708	4461	4892	6782	9426	8549	8677	1787	3124	4609	8894	7156	6781	10492	9331	9747	5117	7911	6678	7103	7164	3849	5131	6696	9337	7318	4728	2234	3081	4559	7794	7449	7098	8076	6724	6851	5170
Rnf20	RNF20-3	R	3050	2371	2838	1739	2878	1401	2567	3928	3743	1804	1738	4222	3647	2537	3061	3778	8971	4083	4696	4412	2383	1159	2597	1750	2096	1726	2437	2558	3761	2949	2569	3075	3475	2580	2343	3025	4167	5043	4891	3733	1849	1205	2377	1372	1340	1834	2153
Rnf24	RNF24-3	M	243	291	158	270	220	124	100	112	155	85	50	59	68	156	141	245	186	133	105	441	190	139	98	267	173	242	74	170	94	138	142	89	93	129	191	235	87	177	67	471	165	200	138	241	140	152	95
Rnf24	RNF24-3	R	825	855	882	681	780	464	623	892	988	611	427	826	785	767	756	931	1716	638	954	656	745	514	577	662	751	607	622	908	1047	799	750	858	861	758	824	995	935	931	870	541	1009	734	680	622	574	691	947
Rnf25	RNF25-4	M	3844	1209	746	1114	1332	681	569	1656	2610	836	486	792	771	1255	1099	1913	2119	798	759	1756	5560	2265	1771	2825	2926	2785	2204	4832	6776	2983	2544	2500	2396	2594	3899	6014	2876	1870	1403	3606	5164	2796	1688	2503	2393	2606	2324
Rnf25	RNF25-4	R	1748	383	543	398	380	199	458	1053	1941	518	336	1158	739	714	602	1227	1893	1491	1594	2743	2578	737	1236	907	1277	945	1419	2996	5212	1953	1515	2934	2687	1707	1974	4406	2510	3843	3570	5229	1840	907	1242	1008	1152	868	1762
Rnf26	RNF26-1	M	3250	3053	1998	2314	2750	1325	1710	2252	2266	1614	1241	1739	2195	1993	2993	2352	2662	1887	1812	4300	3670	2833	2641	3418	3479	3097	2526	2713	2701	2665	3098	2443	3122	2778	4406	2898	2482	3164	2717	3079	4458	4859	3506	3774	4469	3765	4226
Rnf26	RNF26-1	R	925	826	886	705	978	534	983	1076	1290	817	544	1880	1434	1125	952	1275	3482	2043	2405	1750	835	601	1079	806	1169	1039	1333	1130	1415	1340	1228	2079	1816	1448	1193	1257	2220	2940	2373	1851	1201	1061	1496	848	1117	1110	2051
Rnf31	RNF31-1	M	14791	15596	11517	15023	16722	8574	6147	14114	14395	10205	8061	11511	12988	18330	16951	15877	14990	4269	7962	7591	18230	18211	14469	19183	19835	15722	13225	16881	13814	16485	18932	13051	17012	14034	21054	15102	10431	6089	9518	9918	19133	17556	15592	16569	17214	17302	16142
Rnf31	RNF31-1	R	1169	885	1568	889	1348	552	1024	1638	2014	1144	1025	3133	2848	2527	1681	2505	6697	4568	5806	4012	1681	1202	1885	1295	1519	1015	2150	2030	2467	2007	2571	3890	3650	1942	2363	2799	4423	6607	6987	6566	1485	937	1794	736	1198	1023	2145
Rnf31	RNF31-2	M	3568	3396	2297	3079	2995	1756	1521	2501	3519	2598	1828	1895	2331	4047	3077	3699	2198	602	1191	1267	3069	2882	2419	3536	3440	3218	2413	3336	2819	3152	2891	2216	2708	2624	3405	2786	1250	682	1221	1161	3406	4217	2522	3327	3378	3940	3365
Rnf31	RNF31-2	R	623	365	619	328	421	225	442	708	1005	607	496	1580	1019	1113	727	1117	2183	1690	1918	1666	482	315	539	379	492	364	807	839	902	804	830	1599	1118	679	752	819	1438	1850	1599	1857	656	503	659	341	513	496	1152
Rnf32	RNF32-1	M	1263	2373	1740	2122	1823	1440	891	654	841	536	628	1838	1730	2768	1706	4366	4538	4513	3000	11000	1196	2380	1793	2895	2991	2020	1662	1132	641	887	1013	3178	2585	3029	3943	5061	3201	7361	3017	11419	1927	4029	2218	2706	3225	2822	2286
Rnf32	RNF32-1	R	14461	15515	14210	14753	15469	7973	11820	13858	16408	12484	9241	19035	16729	17424	14575	16311	25392	14261	19472	9992	13870	11698	16186	18173	18285	16269	17580	18911	19951	22569	20955	26078	23817	18051	20757	16403	19632	19775	21303	11935	18197	21939	15674	17907	18632	20718	27646
Rnf32	RNF32-2	M	7112	7402	3818	6148	6203	3616	3852	4792	5277	3599	2870	4239	3976	5829	5872	6380	9490	3080	2990	4731	6612	5689	4107	7492	6918	6998	5524	5857	6015	5363	5711	4928	4818	5295	7240	6320	6521	4368	3977	4589	8239	8954	5130	8032	7213	7424	7404
Rnf32	RNF32-2	R	3631	3104	3763	2698	3666	1803	3193	4711	4921	3288	2093	5823	5403	4152	3793	4667	9989	5693	7485	6198	3695	2609	4275	3262	4518	3250	4121	5399	5888	5514	4657	6985	6428	4955	4968	4967	6320	8456	7486	5890	4564	3778	4795	3183	3617	3836	5798
Rnf34	RNF34-2	M	3056	1832	934	1370	1654	887	548	1770	2165	953	664	909	1022	1572	1553	2154	4213	821	818	1060	2572	1809	1182	1845	1669	1739	1309	2172	1993	1444	1684	1283	1346	1305	2010	2198	2064	1135	1047	1315	3060	2192	1436	1945	1853	2050	1597
Rnf34	RNF34-2	R	717	275	295	214	318	144	226	693	867	258	186	582	488	490	358	735	1911	852	926	594	548	306	378	280	416	267	365	698	766	421	539	901	646	433	556	676	1028	1062	1109	1053	642	369	442	281	289	332	554
Rnf38	RNF38-1	M	2269	1738	991	1415	1179	707	725	1076	1201	600	432	254	390	613	685	846	740	105	203	196	1367	917	898	1651	1260	1238	875	1467	1109	994	915	517	659	829	1334	1055	551	221	311	308	1653	2005	997	1519	1196	1657	1426
Rnf38	RNF38-1	R	329	222	222	146	208	99	277	264	347	149	112	276	243	186	146	376	804	301	317	244	236	101	180	179	201	190	261	397	432	274	295	490	398	231	309	388	788	535	476	301	286	240	219	151	181	191	483
Rnf38	RNF38-5	M	18855	16039	10773	14128	15712	8370	7905	15241	16460	9300	6819	9238	10401	11957	15263	14763	18922	2212	5997	3887	20775	16807	15905	20201	19305	19158	14166	19602	20230	15115	14156	8575	10404	11607	15914	15163	14386	2659	7001	2604	25528	23248	19146	19010	17945	18729	17864
Rnf38	RNF38-5	R	1497	897	912	797	1088	492	1204	1891	2212	919	920	2562	2665	1532	1528	2445	7523	3893	3733	3915	1469	948	1614	1056	1370	1146	1728	1816	2470	1325	1595	2734	1894	1547	1418	2503	4532	5032	3437	2743	1671	1259	1597	890	1073	1027	2055
Rnf39	RNF39-1	M	160	442	324	405	232	174	80	137	82	75	103	431	240	301	281	963	715	1330	718	2235	173	216	270	344	357	243	136	159	43	121	154	368	257	191	294	714	583	1291	407	2299	131	297	225	153	201	166	85
Rnf39	RNF39-1	R	2808	2312	2639	1885	2388	1158	1636	2638	2907	2073	1507	3089	2992	3290	2343	2836	6109	2301	3647	2324	1891	1116	1657	1446	1648	1422	2002	2388	2304	2356	2112	2930	2847	1829	1875	2169	2856	2651	3097	1597	1390	1017	1246	827	964	993	1460
Rnf39	RNF39-2	M	332	384	470	428	429	230	79	55	65	32	59	563	311	422	328	1773	1349	2337	999	4526	205	407	389	424	411	221	70	110	43	45	31	215	229	409	310	1399	692	2115	943	3762	256	424	366	516	381	331	266
Rnf39	RNF39-2	R	3422	2143	2451	1916	2620	1142	1705	3387	3851	1508	1475	2923	3134	2852	2530	3451	7662	2810	4446	2707	2252	1348	1685	1427	1775	1099	1776	2987	2505	1653	2174	2545	2697	1465	2261	2831	3239	2401	3029	2231	2965	2132	2628	1756	1892	1814	3202
Rnf40	RNF40-1	M	1716	1282	856	1009	1246	687	473	1406	1584	733	551	852	774	1506	1264	1765	2362	421	682	506	2131	1443	952	1334	1408	1084	1236	1867	1475	1199	1643	1008	1221	1147	1697	1406	1123	557	662	591	2047	1099	991	995	1097	1045	1129
Rnf40	RNF40-1	R	227	115	217	128	163	68	95	331	364	136	111	358	275	293	211	476	1593	703	689	407	375	156	178	196	191	120	271	368	373	269	251	451	365	209	218	407	921	711	674	549	296	100	197	113	126	107	214
Rnf40	RNF40-2	M	25087	24195	17060	21502	21563	12725	14772	20774	21163	14642	11174	13876	14233	19427	23461	20881	18802	5827	9621	15003	21406	15665	16103	22715	22648	22373	16022	19957	21440	21976	20173	15304	17423	19196	23256	19444	11736	8363	9025	13895	27210	27748	20711	25953	23785	25979	24466
Rnf40	RNF40-2	R	5642	3758	5902	3986	4816	2375	5935	7023	8784	4859	3563	12650	9954	6777	6506	9040	26674	18508	19243	14220	4121	2611	5352	3763	4766	3972	5714	5920	7594	5984	6786	12717	10150	6162	7929	6688	15197	23812	17881	12322	6077	4753	6625	3811	4794	3844	8858
Rnf8	RNF8-3	M	1786	518	268	454	488	331	177	739	747	185	186	225	211	442	490	1056	1348	239	376	496	1880	873	469	772	630	458	487	969	568	301	254	166	172	178	387	489	602	205	165	244	2526	1330	782	936	973	905	793
Rnf8	RNF8-3	R	463	95	114	72	119	49	91	418	436	98	48	300	154	212	152	579	994	283	443	171	350	145	136	105	134	69	182	405	303	107	102	108	130	58	95	197	389	210	167	112	439	189	262	125	192	135	403
Rprd1a	RPRD1A-1	M	4754	4727	2662	4297	4546	2466	2242	3271	3526	2030	1743	2626	1848	2899	3609	3772	5293	2533	2318	6806	4081	4121	3377	5970	4910	5154	2456	3871	3819	3342	3106	2436	2520	3253	4736	4358	4076	4118	3698	7164	5725	6514	4407	6258	5057	5789	4409
Rprd1a	RPRD1A-1	R	3810	2851	4129	2450	3602	1757	3917	4673	4940	3086	2256	6506	6084	4512	4670	5290	10956	6799	7974	6801	4505	2333	4476	3210	4594	3540	5028	4848	5774	5309	5635	8499	7778	6045	5817	6159	7761	11028	8626	6785	5354	3629	6137	3927	4540	4424	6421
Rprd1a	RPRD1A-2	M	2579	2559	1476	2455	2455	1404	1264	2014	2167	1226	995	1433	1049	1724	2351	2430	2813	1617	1246	3192	2767	2762	1895	3637	3421	3307	1716	2496	2735	2245	2042	2008	2216	2145	3419	3148	2383	2690	1577	2802	4046	4131	2408	4140	3312	3792	2692
Rprd1a	RPRD1A-2	R	2707	1899	2389	1447	2139	941	1808	2862	2960	1791	1620	3322	3425	2787	2824	3196	6041	2927	4202	2577	3015	1819	2825	2351	2711	2101	3435	3695	3910	4149	4362	4957	4598	3627	4220	3659	3847	4585	5250	3888	3217	2407	3390	1826	2531	2507	4642
Rybp	RYBP-1	M	2350	1576	869	1055	1204	682	697	1570	1504	436	303	331	365	509	715	994	1404	97	158	296	1624	882	835	1307	1289	1272	682	1327	1157	915	1003	591	616	1018	1306	1611	995	294	328	351	1891	1409	1024	1458	958	1374	829
Rybp	RYBP-1	R	490	210	211	135	148	85	247	487	501	105	75	233	184	121	157	311	954	178	205	246	282	100	218	162	180	169	250	369	538	257	223	356	282	295	307	458	694	500	422	381	323	171	246	157	167	139	267
Rybp	RYBP-2	M	5935	6738	5070	7477	6430	3931	2920	4380	5275	4406	3349	4327	4528	8932	6150	7200	7783	4158	4414	3996	5745	6420	5430	8234	7944	7661	5678	6457	5715	7488	7747	6076	7452	6780	9271	6692	5611	6001	4731	4792	8080	10786	6482	7635	8654	9447	8752
Rybp	RYBP-2	R	1614	1449	2088	1434	1572	669	1732	2197	2614	1887	1565	3403	3292	3021	2279	2793	6879	4153	5464	3119	1403	1289	2188	1365	2207	1518	3462	3203	2909	3185	2909	5970	4658	2798	2827	2593	4245	5067	5734	3888	2037	2129	2005	1455	1767	1810	4804
Scmh1	SCMH1-1	M	2034	1480	765	1131	975	673	257	1518	1136	426	290	203	291	534	604	899	926	150	146	348	1450	840	607	1139	824	952	477	1359	1124	733	712	312	508	432	828	983	613	219	164	495	975	551	380	535	429	514	325
Scmh1	SCMH1-1	R	957	525	510	378	523	249	318	958	958	372	207	513	419	438	373	893	1990	422	578	381	702	319	355	335	363	272	414	803	930	495	462	574	562	402	434	713	1161	620	694	582	387	173	252	159	167	186	280
Setd1a	SETD1A-3	M	19978	21029	14625	20241	23497	11777	11085	19469	17785	13054	11810	17061	18673	26062	25338	22483	23104	11711	14467	15863	20856	22445	16704	23675	23936	19817	19601	21371	16908	19020	26895	18532	22234	20252	27542	20987	15042	14591	17686	16097	27796	26746	22511	25202	26222	25595	28860
Setd1a	SETD1A-3	R	6646	6313	8327	5620	7661	3502	4254	7767	9275	6607	4531	14043	11048	11156	7843	10723	29943	15809	20363	14847	7990	6143	9149	6081	8285	5729	7380	8713	9868	10005	9665	13132	13652	7752	9018	9119	16164	17167	18016	19348	8449	5855	11383	5751	6862	7468	9257
Setd2	SETD2-1	M	6111	4639	3558	4107	4593	2796	2348	6610	7200	4128	3396	4608	4600	6901	7283	6364	3023	427	1633	1028	6201	4102	3116	4401	4246	3705	3023	5024	6339	4141	4378	2217	3207	3079	4926	4419	1535	519	1646	754	5773	3732	3883	3936	3721	4471	3359
Setd2	SETD2-1	R	205	94	104	82	122	34	122	312	395	185	163	448	376	352	266	387	643	479	607	824	207	53	74	59	92	54	152	160	309	142	177	264	197	109	143	225	358	481	487	526	134	40	104	38	65	53	137
Setd2	SETD2-3	M	1220	612	384	712	734	392	277	996	1134	417	274	212	353	484	598	818	259	56	84	342	1674	852	834	1189	1018	1179	658	1638	1247	853	953	475	586	845	1181	1382	235	200	266	645	1368	947	1071	1360	1150	1333	827
Setd2	SETD2-3	R	329	102	113	91	151	66	101	321	563	135	96	259	253	213	167	450	353	227	298	612	412	131	247	248	260	254	289	448	582	391	426	562	451	385	421	613	522	550	707	1135	325	214	379	211	263	234	367
Setd7	SETD7-2	M	12371	13060	9308	12727	13898	7281	6817	11528	10667	8221	5933	6193	7933	11967	12453	11560	8822	3308	4511	7658	14907	13208	12781	18122	16447	15797	11059	15099	13511	14045	13976	8938	10085	11573	16406	12770	5172	5502	5627	8774	15042	16274	13103	15794	13657	14823	13011
Setd7	SETD7-2	R	3468	2282	3462	1974	3103	1292	3145	4595	4706	3066	2434	8936	6622	5236	4276	5006	15052	9650	11792	8382	3419	2459	3896	2458	3733	3074	4959	4035	5959	4903	5586	10269	8394	5725	6234	6112	10707	13476	12953	9443	4181	2768	3898	2324	3267	3093	6548
Kmt5a	SETD8-5	M	6993	6368	4084	4562	5719	2301	4045	4883	4531	2372	2046	2747	4197	2875	6333	3503	8064	1933	3839	3551	6590	3973	4110	5126	5192	4478	3555	3920	4426	3545	4483	3440	4809	4293	6900	4621	5673	3860	4569	2562	7598	6226	5134	5974	4860	3988	4293
Kmt5a	SETD8-5	R	3123	2326	3243	1875	3172	1471	3634	4524	4653	2155	1775	5307	4139	2704	3316	3729	8701	5062	5685	6611	3282	1414	2966	2617	3155	2603	3080	3169	4571	3632	3940	5057	5132	3787	3687	4611	5644	9131	6924	5761	3253	2291	4257	2950	2562	2212	3523
Setdb1	SETDB1-6	M	3986	3891	2210	2992	2978	1763	1919	2952	3122	1879	1418	1630	1967	2270	2856	2504	2693	1138	1429	2676	4408	3277	3021	4959	4530	4735	2803	3889	4617	4380	3536	3121	3128	3702	4967	3442	2302	2118	1781	2326	5056	5390	3334	4910	4142	4912	4099
Setdb1	SETDB1-6	R	2508	1864	2300	1247	1956	897	2455	2698	3490	1831	1340	3792	3221	2029	2509	3315	6403	3922	4811	4285	2566	1441	2603	2176	2545	1989	3298	3530	3890	4090	3784	5849	4836	3339	3829	4077	5200	7175	6042	5133	3133	2287	2789	2014	2249	2387	4544
Setdb1	SETDB1-7	M	9381	10132	6444	10145	10009	5423	3607	7710	8105	5843	4693	5771	7556	11609	9707	9344	8879	3823	5062	5757	10851	11977	8237	13965	12697	9786	8285	10839	8669	10347	10532	6864	9805	8342	13175	8741	5684	4967	4590	7549	10859	11612	7415	9824	9392	9898	9128
Setdb1	SETDB1-7	R	1958	1434	2331	1445	2227	988	1617	2894	3180	1920	1826	4902	3691	4478	2542	3574	8746	5449	7815	4483	2720	2066	2962	2012	2791	1933	3691	3341	3586	3316	3872	5675	5173	3049	3895	4049	5724	6819	8069	5882	2159	1688	2468	1317	2222	1636	3678
Setdb2	SETDB2-1	M	725	180	131	158	211	94	129	363	704	281	139	213	158	232	269	418	118	29	90	128	1591	457	497	481	466	576	348	823	1061	479	404	320	388	381	550	1101	239	216	280	544	762	336	347	331	304	321	288
Setdb2	SETDB2-1	R	175	29	39	19	50	15	51	128	291	100	58	115	105	58	92	172	100	53	86	115	330	81	169	92	125	124	109	260	428	110	144	219	198	122	178	426	210	308	300	458	185	57	76	55	70	70	117
Setdb2	SETDB2-2	M	3066	2550	1367	2177	2411	1280	780	2075	2460	1716	1158	1412	1754	2737	2611	2698	1945	639	1091	1657	2808	2184	1572	2206	2293	1844	1473	2263	1427	1631	2004	1115	1396	1536	2297	2110	968	938	847	1795	2813	2339	2080	2609	2253	2631	1919
Setdb2	SETDB2-2	R	1952	939	1326	754	1152	616	937	2222	3318	1482	1149	2904	2299	2350	2154	3180	3771	2433	3048	2896	1575	781	1269	1023	1137	773	1223	2066	1831	1433	1709	2032	2157	1288	1647	1871	2259	2353	2981	2996	1886	979	1602	838	1130	1033	1800
Sfmbt1	SFMBT1-1	M	14901	12383	7907	10838	11972	6090	6173	12358	12394	8493	5704	8285	8308	10095	13930	12317	11719	5205	5980	12282	11121	7854	7525	10112	9613	9702	6613	9672	9441	8468	9097	5792	6988	8560	10965	9246	6155	6486	5042	10711	12981	12858	9652	11767	10304	10896	9296
Sfmbt1	SFMBT1-1	R	7176	4670	6096	4025	5751	3498	5921	8314	10424	5055	4609	11571	9947	7684	8084	10697	18015	11399	13278	12918	5373	2987	5533	4077	4945	3912	5478	6943	7081	6610	6015	10613	8988	6032	6214	7898	10426	11874	12375	11376	6388	4183	7350	4146	5001	4905	8726
Sirt2	SIRT2-1	M	5145	4798	3199	4214	4781	2545	2256	4532	4912	3160	2371	3774	4039	5095	5292	5131	6630	1636	2553	2061	5080	4381	3416	4870	5045	4182	3886	4810	4432	4262	4924	3904	4376	3953	5842	4852	3815	1867	2893	2480	5344	5133	4378	4897	4685	5562	4694
Sirt2	SIRT2-1	R	699	447	574	329	598	264	440	894	911	597	411	1164	1159	802	773	1152	2208	1714	2046	2508	699	383	727	560	584	529	701	924	1045	774	1024	1341	1259	826	791	837	1387	2059	2171	2644	796	437	797	495	715	532	1074
Sirt2	SIRT2-2	M	2464	1318	739	1032	1240	583	549	1624	1845	918	544	790	751	976	1288	1588	1637	214	477	930	3017	1937	1366	1990	1968	2031	1376	2796	3074	1917	1831	1191	1571	1849	2421	2991	1513	410	840	1393	3353	2192	1831	2276	1914	2264	1733
Sirt2	SIRT2-2	R	148	54	95	37	56	38	92	145	165	65	51	226	144	102	101	185	385	454	434	759	186	76	174	105	127	74	150	190	348	198	203	409	287	185	168	367	405	904	704	1298	197	82	145	90	124	99	239
Sirt4	SIRT4-1	M	4949	5974	3441	6390	6347	3746	2956	4148	4297	3785	2665	3935	3286	5126	5425	5791	7313	4418	3769	7681	5129	5563	5105	7859	7749	8113	5053	5640	6419	6987	6483	5480	5183	6669	7941	7045	6010	6861	4095	7809	7744	10328	5514	8823	8472	9142	6926
Sirt4	SIRT4-1	R	5598	4688	6475	5162	5093	2762	4811	6834	6882	4879	3598	8969	7446	7327	7164	7212	14026	8499	11008	7159	4742	4067	6120	5977	6737	5260	6882	7089	7153	8646	8486	12539	11219	8126	8646	8210	9340	12953	11533	9235	7290	6275	7852	5898	6626	6890	11917
Sirt5	SIRT5-1	M	571	523	284	364	510	279	265	456	427	262	241	253	284	350	496	421	448	364	331	1097	511	361	354	673	601	716	342	464	378	362	411	305	307	587	763	750	285	678	305	943	495	489	361	503	421	611	431
Sirt5	SIRT5-1	R	1156	874	1001	683	769	429	974	1141	1061	872	659	1457	1222	1067	1198	1072	2517	1264	1449	1000	1021	598	1027	781	990	802	1161	1295	1706	1340	1211	1830	1690	1286	1473	1498	1695	1712	1576	1139	1182	776	964	626	683	793	1354
Sirt6	SIRT6-1	M	2687	3518	2280	3395	2955	1800	1703	1971	2304	2071	1599	2247	2530	3629	2596	3179	3463	1249	2070	2360	2349	2662	2182	3359	3294	2789	2293	2613	2135	2640	2962	2379	2823	2507	3272	2420	1869	1490	1595	1724	2487	3441	2140	2738	2751	3339	3030
Sirt6	SIRT6-1	R	1026	1049	1446	802	1012	589	856	1027	1358	1013	781	2038	1707	1698	1152	1593	3446	2349	3065	2110	755	572	1057	869	1079	830	1274	1326	1168	1168	1369	2672	2005	1101	1127	1226	1883	2565	2553	2179	915	957	933	758	901	923	1597
Sirt7	SIRT7-1	M	4021	2702	1611	2669	2855	1589	1192	3060	3660	1716	1433	1870	1735	3177	3083	3539	6703	1587	1629	653	3508	2597	1594	2503	2775	2343	2133	3170	3000	2195	2882	1924	2476	2184	2935	2625	2976	1554	1615	823	4675	3081	2377	2929	3152	3369	3357
Sirt7	SIRT7-1	R	329	187	332	180	238	104	179	439	438	220	181	473	389	351	306	488	1340	790	761	759	308	206	230	149	232	159	272	376	350	273	391	539	474	260	333	343	521	784	818	1031	319	238	378	231	281	183	464
Smyd2	SMYD2-1	M	1817	937	467	761	828	437	389	888	1181	533	369	606	748	1186	1054	1514	3471	749	746	1358	2664	1270	556	1301	844	871	902	1333	1242	766	1073	825	1068	794	1618	1168	1752	986	1024	1680	1962	859	648	802	740	746	752
Smyd2	SMYD2-1	R	771	420	678	369	515	225	377	905	968	422	369	1158	896	979	793	1356	3999	1584	1673	1243	1224	607	736	583	679	471	876	1338	1378	888	1004	1016	1172	623	791	1352	2174	1643	1732	1527	966	344	712	335	393	354	636
Smyd3	SMYD3-1	M	1517	1355	786	1266	1448	712	670	1222	1169	838	694	937	1025	1520	1488	1608	2181	888	920	1629	1822	1327	916	1551	1654	1319	1252	1374	1222	1077	1390	1143	1250	1204	1916	1575	1437	1221	1184	1624	2603	1830	1540	1904	1947	1981	1994
Smyd3	SMYD3-1	R	1511	1097	1000	896	1266	646	903	1618	1803	1073	718	1893	1723	1486	1298	2033	4046	1795	2484	1903	1429	988	1369	1268	1445	1036	1357	1555	1705	1648	1937	1894	2049	1564	1678	1672	2534	2427	2205	2084	1936	1592	1962	1372	1341	1263	2112
Smyd3	SMYD3-2	M	3266	2682	1755	2602	2942	1761	1803	2759	2142	1560	1239	1865	1710	2146	3075	2566	3190	1322	1267	3630	2918	2213	1962	3220	3184	3057	2181	2535	2382	2521	2816	2181	2224	2665	3473	3116	2624	1817	2182	3312	4050	3448	2759	4041	3293	3792	3173
Smyd3	SMYD3-2	R	2517	2244	2609	1718	2669	1032	2562	2996	3296	2030	1353	3927	3302	2390	2783	3120	6209	3697	4405	4156	2123	1318	2632	2187	2470	2208	2543	2831	3350	2847	3010	3735	3765	2920	3216	3090	4057	6207	4614	3807	2946	2530	3791	2379	2401	2619	3520
Sox2	SOX2-3	M	943	2214	1357	2092	2038	1190	160	144	41	132	145	2329	1157	2288	1938	4816	4305	5602	4150	4681	1005	2011	2190	3171	2764	2306	1164	201	185	122	379	3077	1720	2158	2441	5434	2657	8411	3940	4613	1816	3503	2285	2944	3550	2471	934
Sox2	SOX2-3	R	5408	4670	4848	4340	5449	2751	5294	6085	6447	5272	3527	7316	7277	6077	5993	4867	11832	4496	6672	4830	5352	4281	5987	5535	6303	5345	6416	7512	6686	7342	7644	8195	8177	6146	8034	3780	8790	6853	8772	5532	7061	7157	7397	6108	5836	6892	11539
Sox6	SOX6-3	M	1612	1900	1559	789	1401	390	224	812	800	207	409	541	1684	443	1603	361	1447	721	1887	1281	1717	1549	1779	1044	1594	829	363	1006	895	437	1046	691	1983	491	2057	287	1140	1076	2635	1103	2544	2704	2654	1483	1904	1079	530
Sox6	SOX6-3	R	684	570	722	614	850	396	858	1059	1085	757	597	1291	992	1039	927	1153	2451	1402	1495	1526	670	559	683	753	730	779	1045	966	1038	1111	1018	1611	1199	1280	1092	1085	1533	2074	1333	1627	1097	857	1158	832	894	1011	1906
Sox6	SOX6-4	M	2480	2783	2063	1646	2324	842	361	1402	1324	472	724	627	1831	1080	2430	903	1671	1174	1776	2228	2464	2718	2306	2195	2397	1691	564	1547	1490	851	1729	824	2201	1070	2902	1051	1279	1644	2305	2380	3125	3546	2982	2204	2709	1812	819
Sox6	SOX6-4	R	1541	1265	1354	1826	1868	1124	2184	2389	2402	2245	1536	3736	2468	3295	1966	3399	5822	3044	3447	2849	1713	1163	1705	2194	2287	2303	3242	2822	2986	3280	2982	3974	2980	2955	2393	3239	3493	4028	3154	2930	2086	1646	2056	2272	1888	2634	4313
Ssrp1	SSRP1-2	M	30970	32187	22728	29134	33016	16264	17122	27103	31138	19689	17863	29829	31352	43823	34296	34849	53504	21312	31597	10698	35471	36155	26386	37004	37955	28256	33360	35531	29500	30782	38951	34031	37358	30740	42666	33134	32334	24439	33012	11825	43160	42728	29990	32119	36596	33869	47184
Ssrp1	SSRP1-2	R	3557	3414	4392	3106	3804	1873	1992	5351	5635	3471	1910	6280	6372	6010	3328	5992	13494	10081	11432	15165	3558	3725	5534	4028	4112	3192	3498	5621	4549	6101	5429	7820	7629	3792	3930	4729	8434	11904	9173	18736	4111	3783	5175	3745	3400	4459	5419
Ssrp1	SSRP1-5	M	12396	12204	8816	9756	11080	5930	7806	10123	11028	7692	5620	9146	9163	9677	11482	10610	15057	2868	7614	5447	12281	9967	10222	14111	13412	12887	10393	12164	13239	13680	12522	12585	11964	11869	14994	13011	11993	4118	9020	4548	15772	16442	12350	14055	13269	14597	15405
Ssrp1	SSRP1-5	R	1164	880	1377	891	1011	572	1138	1534	1589	1091	640	3067	2070	1489	1339	2182	4271	4878	3748	4886	970	653	1526	1050	1121	994	1532	1639	2032	1723	1522	2742	2252	1695	1527	2089	2958	8092	3578	5496	1283	1111	1752	1043	1221	1339	2562
Stag1	STAG1-1	M	3066	2784	1740	2214	2508	1288	1413	2907	2912	1839	1297	2133	2253	2335	3028	2559	2890	809	1211	2133	3089	2128	1931	2594	2403	2251	1835	2702	3229	2058	2082	1453	1975	2031	2636	2337	1676	1334	1462	2062	2974	2771	2428	2744	2240	2459	2341
Stag1	STAG1-1	R	772	510	608	428	701	299	731	1030	1179	729	550	1660	1376	1091	1028	1295	2788	1656	2048	2162	945	345	750	533	821	611	783	944	1590	1074	876	1693	1499	910	898	1415	2068	2855	2365	1845	940	559	840	598	546	568	991
Stag1	STAG1-2	M	943	631	488	509	732	332	698	820	838	348	323	516	502	501	701	614	852	163	350	383	567	333	334	451	528	501	395	565	467	421	467	437	445	498	655	617	416	331	296	276	611	485	436	637	478	478	571
Stag1	STAG1-2	R	203	113	189	84	215	86	226	263	306	161	110	294	277	146	212	281	508	321	351	550	160	71	157	119	159	144	179	228	308	160	237	349	318	217	176	290	410	487	340	470	176	105	197	141	145	128	203
Stat3	STAT3-1	M	18567	20856	14907	18502	18248	10512	12076	15634	16637	13859	9701	15254	15850	21344	17963	19346	24749	5475	12090	9585	18450	17705	17544	24915	23189	21725	19029	20920	20384	23522	20953	21665	20198	19743	24567	19475	17980	8774	15210	8766	23546	28701	19346	23966	23712	25520	29071
Stat3	STAT3-1	R	2389	1709	2511	1432	2369	926	2560	2575	3532	2007	1738	6305	5086	2899	2599	3933	11009	11898	10249	9828	2108	1529	2713	1852	2385	1865	3596	3017	4045	2979	3411	6483	5576	3235	3023	3075	7345	15216	9274	10981	3049	2330	3057	1722	2258	2237	5108
Stat3	STAT3-3	M	14492	16689	12399	16149	15691	8910	8723	13186	13806	11748	8118	12949	13379	20867	14084	16277	18496	4608	9588	5793	15025	15836	14327	20233	18265	16372	14459	17610	15302	18420	17925	17252	17247	16278	19570	16322	14734	6234	11579	5844	17626	23075	14970	17820	17863	19841	22201
Stat3	STAT3-3	R	1868	1419	2215	1360	1745	799	1777	1719	3184	1694	1469	4575	3849	3023	2186	3795	9647	8072	8940	7665	1697	1309	2035	1394	2043	1618	2893	2428	2619	2502	2729	5315	4416	2393	2604	2483	5277	10127	7225	9285	2129	1689	2268	1371	1984	1738	3430
Suds3	SUDS3-1	M	3066	857	405	495	798	367	441	1490	2100	425	272	461	503	523	762	1430	4456	427	545	274	2037	806	651	805	828	861	748	1363	1524	704	851	649	821	719	1059	1451	1633	833	709	418	2283	1008	755	907	790	850	1052
Suds3	SUDS3-1	R	436	127	108	66	121	48	123	419	549	85	65	212	176	110	136	326	1253	376	269	223	302	91	177	100	139	129	169	258	342	158	200	316	207	168	216	366	522	493	411	488	317	110	234	107	131	118	231
Suv420h1	SUV420H1-1	M	2229	973	444	1068	974	521	251	1174	1259	371	253	214	210	557	704	961	1071	124	117	207	2149	1424	819	1592	1267	1497	628	1649	1344	898	857	408	537	830	1230	1252	569	359	269	541	2286	1627	970	1690	1224	1420	740
Suv420h1	SUV420H1-1	R	465	130	128	121	171	68	100	313	421	112	70	149	115	188	159	302	920	243	203	145	384	196	240	186	236	251	177	409	424	195	258	373	242	199	295	354	497	500	434	445	436	237	232	231	176	193	273
Suz12	SUZ12-1	M	5598	4237	2673	3361	3809	1818	2584	4392	3967	2229	1620	2415	2850	2514	3563	3588	5404	1051	1964	1543	5266	3047	2728	3842	3413	3373	2690	4080	4217	3083	2854	2279	2749	2926	4224	4079	3372	1886	2413	1197	6652	5690	4200	5431	4286	4164	4494
Suz12	SUZ12-1	R	787	440	595	329	570	288	676	1106	1096	431	375	1090	809	575	689	1121	2816	1390	1294	1502	761	324	562	473	696	568	808	904	1291	919	827	1193	900	829	842	1141	1980	1887	1439	1314	979	640	1005	725	592	631	1196
Tbx3	TBX3-3	M	1589	1316	690	1214	1003	600	444	1332	1099	399	296	437	286	482	731	1334	1068	1002	591	3120	1603	930	727	1635	1145	1725	427	1086	1399	777	594	644	469	766	1084	1845	843	1565	840	2398	1552	1579	885	1861	1089	1821	598
Tbx3	TBX3-3	R	3608	1538	2154	1099	1662	697	1935	3181	3247	1360	1017	2885	2108	1776	2080	2859	7075	2319	2822	2857	3260	1017	1857	1531	2032	1618	2309	3000	3772	2280	2516	3522	3031	2434	2720	3616	5851	5010	4028	2714	3289	1438	2745	1618	1742	1432	2445
Tcf3	TCF3-2	M	13652	12240	9632	11431	12806	6352	7307	11415	11071	8476	6658	9253	9863	11179	13095	12035	14115	2054	6678	5126	13252	10575	11057	14285	14583	13866	11240	13329	14851	14992	14707	12047	13490	12736	16400	12721	9851	2656	8421	4932	17093	15530	14077	15268	15011	16207	16608
Tcf3	TCF3-2	R	702	520	749	445	564	277	763	716	1067	589	429	1904	1279	1111	758	1349	4259	5661	3998	4636	670	370	881	591	699	612	1080	973	1352	978	922	2403	1989	1067	1080	1416	2989	9290	4009	5573	761	703	1009	513	752	674	1398
Tet2	TET2-1	M	17617	15193	11820	14338	16957	8671	10321	17486	16326	10715	7684	12024	11574	13648	17128	15255	16542	5981	7979	4562	15225	11483	12056	15775	15440	15103	10235	15928	15306	13184	13762	10930	11351	13593	15307	13892	8410	9287	7410	2051	18394	16751	16814	18899	16440	17075	14833
Tet2	TET2-1	R	555	280	472	266	391	266	543	716	863	469	339	1340	1132	630	837	940	1820	1602	1900	1933	461	288	419	284	315	336	598	497	828	526	637	1246	713	680	568	900	1113	1607	1437	2047	500	307	587	397	414	443	670
Tet3	TET3-3	M	15956	16765	13268	16525	17100	9026	9163	15444	13664	10415	7518	9230	10651	14760	15089	13301	8482	3314	4656	6446	17038	16251	16822	22622	20550	19673	14984	18441	16796	18328	17405	12626	12554	14570	19078	14757	6537	4294	5976	6918	21814	24632	19377	21329	19800	20148	20363
Tet3	TET3-3	R	2541	1803	1990	1345	2440	1013	2578	2986	4286	1888	1922	6407	6639	3783	3195	4902	15915	8641	10801	8708	2437	1871	2606	1779	2256	1850	3467	3091	4169	3697	3395	6264	6185	3950	3697	4773	8995	12704	10872	8231	2996	2105	2827	1728	2297	2276	4929
Tmpo	TMPO-1	M	16656	16191	11983	14012	14714	7866	8677	13398	13025	9882	7836	10235	12270	13692	15957	12825	22290	7914	11869	8795	15491	12860	12590	16726	17916	16664	11951	15411	15421	16382	16506	15317	17090	16568	20783	13331	16171	12912	14861	8703	20163	24211	15962	19341	18991	19623	20078
Tmpo	TMPO-1	R	4444	2935	4982	3416	4826	2176	4858	4782	6354	4340	3100	8766	5544	6174	4546	7080	14262	10970	10797	9123	3390	2350	4923	4085	5271	4782	7908	6147	7747	7723	7068	12114	9224	7019	6511	7587	10113	16232	11204	11126	5548	4544	6396	4157	5267	5855	11266
Tmpo	TMPO-2	M	805	703	488	435	525	291	426	796	1019	507	364	521	757	538	771	589	941	351	620	788	932	485	521	680	666	577	477	651	1055	701	527	523	605	569	803	712	722	678	770	581	841	699	563	706	485	529	542
Tmpo	TMPO-2	R	202	167	181	94	136	85	283	332	479	194	155	562	434	222	324	405	786	553	639	782	285	114	239	166	127	142	272	263	490	276	257	522	334	262	256	324	502	806	708	606	248	130	278	139	133	147	269
Trp53	TP53-3	M	9982	9826	7094	8482	10250	5181	6984	8821	8798	5933	4109	6517	6694	6260	9213	7121	9113	924	4097	1464	8432	6386	7344	10587	9953	10079	6708	7925	8549	9421	9384	7658	7799	8686	10795	8747	6747	1495	5329	962	11937	12217	10450	13168	10120	11682	10078
Trp53	TP53-3	R	271	255	316	218	290	140	333	461	410	268	211	658	503	383	326	461	1198	1172	791	1333	277	157	319	257	328	213	359	350	447	322	361	624	576	422	419	482	786	1528	857	1188	349	232	416	215	294	314	414
Trp53bp1	TP53BP1-1	M	14567	16446	9635	16667	14794	8470	5799	13187	11953	8483	5827	6708	6987	15056	12543	12826	10553	5357	5481	10077	12563	13969	10021	18249	16059	13001	10265	13762	12405	13558	10879	9272	9140	11438	15086	10902	5772	5209	4576	8886	16260	21432	12874	16510	15994	17760	14500
Trp53bp1	TP53BP1-1	R	8341	5455	8478	4738	6551	3246	5928	7798	10140	5567	4873	13086	11997	10633	7856	10906	28806	12639	18108	8891	7358	4755	7103	4731	6050	5333	8521	9419	9857	8047	9529	13156	11914	8320	8530	9882	16347	15171	15991	11931	8104	7519	8039	5446	6997	5783	13306
Trp53bp1	TP53BP1-3	M	902	742	390	689	695	346	317	697	656	273	253	331	410	512	571	792	888	278	302	518	1000	1018	691	1194	1041	879	629	1086	772	503	572	405	439	577	728	806	601	367	319	520	1261	1168	664	855	846	875	710
Trp53bp1	TP53BP1-3	R	852	541	446	341	558	244	437	844	927	400	327	804	947	626	578	860	2015	860	1120	1002	944	631	792	683	831	691	841	997	1218	775	784	958	745	587	714	929	1438	1201	1180	1011	1052	669	694	524	556	551	872
Trdmt1	TRDMT1-1	M	242	183	119	108	143	83	76	179	140	109	86	169	141	165	204	349	368	356	175	984	391	212	151	196	202	221	196	246	341	283	281	332	299	379	508	551	402	723	344	1215	403	336	171	209	243	289	393
Trdmt1	TRDMT1-1	R	656	425	617	279	495	174	418	858	928	452	358	1184	1016	775	694	997	2035	1410	1915	1517	1135	553	803	604	728	568	1102	1368	1641	1391	1554	2190	2219	1179	1148	1670	1925	2231	2079	1990	1495	703	1017	474	726	659	1363
Uhrf1	UHRF1-4	M	4977	4134	2282	2602	2791	1120	1548	3148	3370	2259	1608	1809	2777	2042	3908	2780	3138	745	1805	2012	4189	2588	2633	3621	3200	2150	1737	2832	3161	2834	2746	1963	2935	2241	3850	2603	2389	1182	2019	1577	5019	4798	3230	4016	3023	2663	2450
Uhrf1	UHRF1-4	R	919	398	902	427	677	362	909	1201	1596	792	571	1779	1108	953	930	1586	1983	1751	1579	2601	640	312	724	555	680	736	872	1095	1337	937	877	1630	1125	994	978	1437	1538	2357	1772	2173	823	516	935	658	696	871	1459
Vps72	VPS72-1	M	8022	7892	5035	7017	8417	4147	4576	7485	6980	4389	3482	5880	6341	6907	8003	7189	11421	2843	4430	4756	8047	7190	6124	9121	9117	8459	6102	7810	7678	7549	7675	6877	7249	7432	9806	7885	8643	4231	6467	4370	10455	10594	7895	9861	9803	9711	9811
Vps72	VPS72-1	R	1009	724	1081	624	946	507	1097	1329	1325	907	673	2345	1713	1401	1534	1361	3718	3028	3506	3950	1132	674	1478	979	1079	967	1513	1224	1300	1427	1529	2206	1953	1515	1353	1649	2506	5033	3035	3859	1318	928	1787	1083	1120	1015	1761
Wdr5	WDR5-1	M	6485	5766	3136	4474	4398	2737	3047	3738	4551	2622	2050	2758	3258	3930	4028	4706	7263	2114	2306	2336	5119	3834	2675	5311	4627	4168	3667	4118	4362	3827	3879	3073	3695	3469	5103	4219	4551	2722	2322	2239	6400	7179	3129	4877	4635	5312	5598
Wdr5	WDR5-1	R	2116	1536	2145	1298	1593	834	1564	1692	2132	1419	849	2593	2264	2087	1512	2279	4656	2800	3550	2606	1581	1034	1764	1460	1575	1567	2056	2291	2346	1987	1981	3473	2999	1961	2178	2119	3259	3107	2774	2527	2021	2205	2115	1593	1470	1539	3113
Whsc1	WHSC1-4	M	3843	2024	1104	1437	1803	579	533	2083	2684	1526	1106	1401	2000	2548	3018	2555	2221	1372	1460	1231	5600	3531	2513	2825	2618	1922	1449	3507	2985	2243	2793	1572	2791	2057	3724	3026	2147	2764	2866	2555	3996	2338	2084	1920	1874	1548	1444
Whsc1	WHSC1-4	R	576	277	362	262	449	155	332	889	1327	570	389	1289	802	842	664	1123	1383	789	1035	1001	1014	500	737	482	636	547	842	1191	1423	766	1028	1414	1346	752	902	1637	1374	1248	2011	2606	777	299	693	372	455	475	991
Whsc1	WHSC1-6	M	8851	9015	6259	7012	7643	3672	4874	7076	6651	4970	3576	4685	6210	5579	8319	5773	10046	5095	5618	7667	7110	5389	5452	6823	6441	5593	4016	6247	5944	5695	5848	3766	6310	5098	7668	5582	5246	6371	4875	5852	8510	8674	6775	8078	6181	6373	5189
Whsc1	WHSC1-6	R	2509	1627	2984	1709	2859	1348	3030	3610	3731	2174	2051	5319	3945	3531	3190	4061	8555	5057	6100	7127	1717	1052	2484	1754	2100	1861	3183	2907	3409	3196	3205	5490	3359	3255	2591	3608	4973	6272	6163	5487	2589	1605	2795	1915	2458	2235	4292
Whsc1l1	WHSC1L1-2	M	7063	8294	7188	7986	8240	4540	3642	6696	7836	5715	4588	6358	7044	11869	7928	9685	8691	3158	5533	3165	7377	8197	6651	9720	9560	6456	6740	8609	5856	7840	8887	6651	8637	6382	9877	6620	4458	3477	4735	4039	8233	8523	6825	7047	8421	8465	8579
Whsc1l1	WHSC1L1-2	R	697	446	804	496	600	370	505	777	1379	616	659	2058	1445	1517	853	1763	3221	3277	3674	3383	653	441	719	526	734	446	818	968	886	1037	1084	2212	1774	739	967	1156	2090	2527	2910	3206	744	484	712	336	706	584	1371
Wnt8a	WNT8A-1	M	81	128	106	101	115	50	16	12	32	14	16	219	113	171	164	635	370	763	272	1792	125	170	210	180	184	123	56	5	30	10	56	197	173	184	279	967	216	1227	465	3084	86	88	194	73	141	118	32
Wnt8a	WNT8A-1	R	4074	2900	3015	2518	3862	1587	1852	4248	5003	3238	2581	5111	4765	6618	5051	5726	8520	3796	5412	3112	5939	4149	4529	4208	5129	3547	4633	5882	5274	5083	6787	6414	7691	4409	6614	5661	6506	4990	7225	4906	5206	2758	4263	2689	3909	3340	5220
Yaf2	YAF2-2	M	11531	7830	4807	6526	6550	3737	3919	9163	10216	5167	3547	6327	5701	6588	7712	10120	14663	4743	6622	7093	11722	6748	5304	7428	7507	6639	4827	7545	9429	7686	7121	5989	6601	6223	8164	8754	11349	6812	7735	6474	14577	12131	7574	9170	10749	9988	10610
Yaf2	YAF2-2	R	2887	1512	2127	1469	1777	880	1731	3627	4909	2114	1354	3821	3046	2942	2275	4659	6389	4646	5795	6428	3015	1526	2267	1567	1899	1507	2636	3103	3957	2600	2905	3923	3244	2180	2465	3700	3789	5432	5209	5032	3764	2200	2908	1860	3170	2125	4105
Zic2	ZIC2-1	M	598	871	744	768	580	515	165	123	147	18	104	1317	789	974	857	3496	2842	4987	2434	1980	587	969	1184	1440	1543	919	390	49	186	37	359	1171	785	1194	1481	6151	2267	8071	3339	2264	751	1022	1262	888	885	1000	278
Zic2	ZIC2-1	R	1920	2098	2479	1533	3033	1048	2333	3485	3434	2260	1456	4256	3639	2383	2843	2998	6412	3042	4739	2914	3047	2359	3726	2955	3602	2435	4208	3299	5504	4067	4695	5590	4123	4472	5504	3391	5115	5149	5280	6278	2600	1820	3250	2103	2181	1966	3731
Zic2	ZIC2-2	M	1026	3571	3126	3328	4821	1736	911	393	459	442	546	3431	2395	4162	4232	10074	8264	11250	6307	4775	1003	2500	2469	2838	3992	1610	450	548	600	106	561	3722	1506	2256	4280	7402	3193	10278	4965	5539	2017	2917	2926	2385	2878	2927	1587
Zic2	ZIC2-2	R	8235	5719	7470	6136	7677	3963	5219	9510	10187	5909	4629	10646	9452	10122	6656	6137	17083	6378	12702	9056	7057	4361	5838	5177	4254	5191	7006	7592	6283	9102	7792	8439	8834	6405	7527	4635	7124	5370	9949	8755	5394	5659	6544	3929	5370	5570	8215
Dnajb1	DNAJB1-1	M	4465	5351	4139	6076	6781	3606	1798	2631	2159	2016	2183	2648	3855	3892	4571	3645	8698	2225	3833	3573	5577	4892	4749	6465	6136	5709	2655	3223	3349	3469	5158	3209	4631	3428	5282	4237	4878	2911	3633	3418	6745	5896	6550	7781	6730	7460	3809
Dnajb1	DNAJB1-1	R	1539	965	1056	570	1094	433	1278	2769	2849	1784	990	3603	2553	2181	2366	2667	4872	3365	3211	3555	1073	742	1076	651	1118	688	1568	2154	1932	1603	1920	2425	2091	1841	1642	1790	2235	3484	3220	3270	1357	926	1589	775	960	929	2481
[truncated: 13 more columns]

## Sheet: Averaged_Qt
Gene	Amplicon	M2-1	M2-2	M2-3	M2-4	M2-5	M2-6	M6-1	M6-2	M6-3	M6-4	M6-5	M12-1	M12-2	M12-3	M12-4	M12-5	M23-1	M23-2	M23-3
Arf1	ARF1-2	0.0128155	0.0136482	0.0231908	0.0216126	0.0291556	0.0148356	0.0117347	0.00642611	0.00435151	0.00348137	0.00652098	0.0422578	0.0228925	0.016933	0.022347	0.0823352	0.0831709	0.484353	0.0992907
Arf3	ARF3-3	3.19882	3.58202	4.07868	4.20475	4.14605	3.97364	4.34166	4.21211	3.66449	4.39713	3.95103	3.43145	3.11654	3.91049	3.84967	3.48728	2.58326	0.660119	1.67927
Arf4	ARF4-1	4.71744	4.88149	4.60667	4.9201	4.45528	4.30135	4.73876	4.25323	4.72908	5.73086	4.21505	5.15515	4.65852	4.80725	4.56547	5.22447	8.62173	3.1396	6.90384
Arf5	ARF5-1	7.13637	5.59955	5.68711	3.71766	4.7731	3.92672	7.59562	5.65601	6.02423	4.57377	8.1026	12.2679	11.3473	6.8495	7.30344	5.63553	16.0973	28.4529	22.9749
Arf6	ARF6-1	27.4926	32.8933	33.4004	28.4122	30.1035	32.5302	36.6954	29.732	29.8208	34.7011	35.6561	38.0646	40.2661	41.0803	27.5398	30.7525	26.8804	19.0686	34.9059
Arpc5	ARPC5-2	17.063	10.6945	11.3508	11.2387	12.3896	13.2798	12.5429	13.8304	16.7161	15.4725	16.4382	18.7239	15.4248	12.1226	12.9401	16.4176	26.6445	20.5024	14.8377
Asf1a	ASF1A-1	1.39377	1.02866	1.10571	1.00848	1.09939	0.949223	1.20734	1.08628	1.1621	0.901538	1.10906	1.20086	1.32662	1.27666	1.41468	1.22796	2.30905	1.84745	2.37621
Ash1l	ASH1L-7	1.06076	1.16456	1.32945	1.40528	1.25733	1.29135	1.01221	1.24157	1.12353	1.1186	1.03088	0.768855	0.833581	1.0466	1.02798	0.944057	0.489117	0.418614	0.575557
Ash1l	ASH1L-9	0.989123	1.10387	1.10139	1.33114	1.13517	1.14106	0.891002	1.22393	0.904834	1.22187	0.891076	0.839019	0.786174	1.02077	0.898821	0.843973	0.421782	0.559613	0.551999
Asxl1	ASXL1-3	0.0731228	0.112449	0.127659	0.0999347	0.105993	0.121616	0.0999772	0.0949534	0.0707521	0.129737	0.132107	0.160056	0.1309	0.146883	0.138778	0.165401	0.115779	0.569717	0.244923
Asxl1	ASXL1-4	0.683812	0.778176	0.686901	0.689091	0.651675	0.690772	0.745647	0.868238	0.783398	0.732071	0.710324	0.578528	0.581593	0.681983	0.682273	0.713621	0.41795	0.430266	0.400182
Axin2	AXIN2-1	0.462175	0.406372	0.372463	0.505401	0.475243	0.62903	0.329341	0.473415	0.354787	0.359867	0.310001	0.25898	0.221617	0.304668	0.334377	0.43811	0.189217	0.431416	0.199726
Bap1	BAP1-1	0.9116	0.834882	0.712092	0.786012	0.787347	0.868426	0.759413	0.760277	1.04314	0.867316	0.762108	0.717974	0.829168	0.719732	0.785245	0.812888	1.12144	0.858009	0.931708
Bap1	BAP1-3	0.58327	0.507492	0.413696	0.441347	0.507058	0.443213	0.537003	0.457565	0.555564	0.481297	0.439701	0.470008	0.491593	0.439947	0.522225	0.519969	0.772811	0.621983	0.589601
Bmi1	BMI1-1	0.665567	0.573355	0.436661	0.382911	0.466036	0.632618	0.535319	0.522292	0.595648	0.488858	0.453322	0.528836	0.607205	0.526433	0.633827	0.963923	1.01456	1.1863	0.701282
Bmi1	BMI1-2	0.689749	0.62597	0.592448	0.574747	0.62537	0.677794	0.658674	0.726799	0.723946	0.677172	0.652383	0.640186	0.730864	0.697919	0.703579	0.814131	0.768209	0.648157	0.673416
Brca1	BRCA1-3	0.228819	0.218568	0.206297	0.128799	0.168485	0.0936737	0.154202	0.144798	0.16923	0.103833	0.15067	0.16398	0.326284	0.161504	0.280557	0.165974	0.25991	0.788576	0.688573
Brca2	BRCA2-1	0.152154	0.135546	0.16724	0.112973	0.118731	0.0799241	0.0918357	0.10736	0.109154	0.0704106	0.102728	0.130352	0.159345	0.107902	0.149984	0.145538	0.132561	0.588719	0.291935
Brca2	BRCA2-3	0.191957	0.17112	0.222269	0.140182	0.180396	0.103058	0.124874	0.140514	0.13884	0.101827	0.140187	0.179103	0.264688	0.172497	0.272129	0.159591	0.168459	0.58951	0.486885
Brms1	BRMS1-1	0.889053	0.884948	0.578902	0.806471	0.877614	0.846948	0.921945	0.678129	0.949171	0.82507	0.852761	1.05216	0.83875	0.900822	0.822303	1.02509	1.60304	1.77918	0.923869
Carm1	CARM1-1	1.19835	1.20113	1.05421	1.08165	0.956285	0.949457	0.761573	1.02939	1.0954	0.983195	0.862006	0.708863	0.865365	0.68123	0.989635	0.889402	0.804218	0.678646	0.835411
Carm1	CARM1-3	1.95025	1.79138	1.77656	1.66869	1.53308	1.68307	1.22532	1.6898	1.77103	1.62183	1.51307	1.16008	1.657	1.37727	1.72693	1.19878	1.0975	0.558925	1.4455
Cbx2	CBX2-1	0.0736094	0.0966067	0.0969684	0.0963177	0.0960768	0.0775703	0.0658289	0.0619151	0.0522657	0.0546413	0.0635294	0.123384	0.0778282	0.0783448	0.0765843	0.181762	0.115271	0.687532	0.178833
Cbx5	CBX5-1	0.983407	0.848964	0.587477	0.690312	0.567236	0.451205	0.396744	0.561681	0.695782	0.458947	0.467625	0.341524	0.601814	0.427846	0.73975	0.48216	0.467873	0.790764	0.568335
Cbx5	CBX5-3	0.834848	0.975813	0.685891	0.726095	0.583076	0.477664	0.390384	0.553434	0.608269	0.413984	0.474432	0.244295	0.591931	0.482419	0.802059	0.324512	0.468048	0.614111	0.544806
Cbx6	CBX6-2	0.891041	0.814027	0.886825	0.763271	0.847673	0.722572	0.788779	0.9351	0.886649	0.825197	0.899866	0.884675	0.922481	0.916664	0.853862	0.872701	0.610263	0.494153	0.736757
Cbx6	CBX6-3	0.790749	0.924383	0.863463	0.905257	0.873437	0.828461	0.810207	0.89825	0.825036	0.879248	0.866238	0.779916	0.790219	0.850624	0.885789	0.873316	0.565515	0.529283	0.497479
Cbx7	CBX7-1	1.32634	1.30537	1.44503	1.37397	1.43375	1.53553	1.65021	1.50656	1.7539	1.60587	1.43307	1.47162	1.24441	1.40444	1.25644	1.49824	1.25885	0.622286	1.16643
Cbx8	CBX8-1	0.261969	0.192091	0.163116	0.186232	0.252722	0.189273	0.30973	0.196869	0.22759	0.166331	0.23023	0.354014	0.206243	0.238515	0.212975	0.346972	0.399775	0.746076	0.327945
Cdk4	CDK4-1	3.64017	3.3517	3.16398	2.97941	3.26943	3.0736	3.78715	3.12066	3.75055	3.55352	3.92562	4.24182	4.95083	3.37905	3.5218	3.6865	6.57526	6.51663	5.5435
Cdx2	CDX2-1	0.00508036	0.0107398	0.0204768	0.0113477	0.0164853	0.0114064	0.00348332	0.00127249	0.00280315	0.000779325	0.00255427	0.0350854	0.014763	0.0154836	0.0119726	0.0839331	0.0539749	0.392212	0.107782
Chaf1a	CHAF1A-1	0.371411	0.321514	0.311447	0.235577	0.235101	0.136786	0.221142	0.239188	0.315576	0.230465	0.287453	0.284446	0.422889	0.208168	0.368111	0.262982	0.329958	0.667454	0.471136
Chaf1a	CHAF1A-3	0.36871	0.345762	0.226708	0.195048	0.183718	0.0893843	0.193668	0.191968	0.218412	0.150122	0.274269	0.190721	0.361483	0.182811	0.382767	0.166341	0.254162	0.420506	0.420071
Crebbp	CREBBP-5	1.82594	2.37382	2.60751	2.5019	2.84641	2.30527	2.41121	2.66398	2.01175	2.29132	2.64751	1.89932	1.78996	2.14802	2.50649	1.92939	0.826752	0.496858	1.06755
Crebbp	CREBBP-9	1.5639	1.79592	1.99048	2.13758	1.9513	1.8324	1.68585	2.22538	1.60979	1.82067	1.64029	1.27818	1.40576	1.62684	1.69625	1.448	0.521643	0.433525	0.577791
Ctcf	CTCF-1	2.3468	2.40883	2.10529	1.94916	2.09518	1.8541	2.28788	2.24815	2.28884	1.97664	1.85953	1.9051	1.98596	1.92559	1.93758	2.03085	1.73404	1.16712	2.00981
Ctcf	CTCF-2	1.39288	1.52175	1.53005	1.41009	1.4418	1.47683	1.47514	1.44753	1.46533	1.42388	1.39783	1.44441	1.49458	1.49905	1.50113	1.39734	1.37087	0.761038	1.27263
Dgcr8	DGCR8-4	0.497904	0.45769	0.375807	0.373554	0.436399	0.372711	0.549188	0.477583	0.609569	0.374563	0.466775	0.604495	0.473116	0.542521	0.448426	0.51017	0.593774	0.988309	0.798883
Dicer1	DICER1-2	0.511497	0.54847	0.635326	0.584745	0.541905	0.567373	0.515102	0.654146	0.488663	0.502003	0.521877	0.457656	0.448602	0.560199	0.561773	0.511213	0.273373	0.4122	0.365365
Dicer1	DICER1-3	0.712753	0.724664	0.686007	0.723885	0.674514	0.673968	0.61337	0.715293	0.582917	0.499897	0.636747	0.487774	0.463305	0.691817	0.617883	0.61009	0.26163	0.559091	0.362022
Dnmt1	DNMT1-1	1.38523	1.38007	1.30762	1.27114	1.22101	0.934477	0.997014	1.19482	1.10908	1.20592	1.23255	0.912078	1.24911	0.981131	1.33005	0.86791	0.828846	0.539769	0.968757
Dnmt1	DNMT1-2	1.44798	1.5455	1.55993	1.42712	1.3554	1.15828	1.2626	1.48304	1.15091	1.275	1.49438	1.22648	1.52315	1.2586	1.49827	0.974605	0.757451	0.641255	0.945407
Dnmt3b	DNMT3B-1	0.0979506	0.10214	0.122163	0.121322	0.107752	0.119879	0.0780803	0.0708528	0.0767968	0.0803893	0.0727262	0.102702	0.099863	0.0978615	0.0974751	0.156011	0.127738	0.665327	0.231665
Dnmt3l	DNMT3L-1	0.00661861	0.00881449	0.0162762	0.00868127	0.0140003	0.0123284	0.00738003	0.00241756	0.00386313	0.00476277	0.00639004	0.0257003	0.0138453	0.0139157	0.0156882	0.0745741	0.0521215	0.361113	0.0948947
Dot1l	DOT1L-7	0.696948	0.679516	0.983231	0.780837	0.751815	0.694668	0.630575	0.749439	0.680895	0.618128	0.673782	0.528661	0.635312	0.557572	0.734915	0.568381	0.320399	0.459993	0.497131
Dot1l	DOT1L-9	1.09075	1.10307	1.02087	1.33288	0.917652	0.829145	0.733012	0.993847	0.948785	0.797796	0.825448	0.642475	0.757194	0.750535	0.954874	0.728059	0.343179	0.590618	0.521634
Eed	EED-1	0.803367	0.790042	0.748554	0.678862	0.840906	0.808676	0.880472	0.808701	0.860369	0.715897	0.810051	0.956352	0.836296	0.784696	0.840129	0.944647	1.14019	1.13851	1.15223
Eed	EED-2	1.39352	1.00973	1.06564	0.969255	0.974491	1.0857	1.69479	1.35039	1.35611	0.810512	1.13103	1.3908	1.09601	1.38897	1.35403	1.49225	1.44458	1.87862	1.57636
Ehmt1	EHMT1-1	0.408673	0.464909	0.402074	0.444604	0.440863	0.454959	0.396499	0.452848	0.412928	0.445343	0.331256	0.318232	0.30888	0.340848	0.388832	0.435294	0.322554	0.486788	0.333025
Ehmt2	EHMT2-1	2.48254	2.28248	2.19734	2.31934	2.57137	2.66101	3.70717	2.88197	3.07052	3.01299	2.97626	3.25784	2.50569	3.13451	2.96501	3.01809	3.30043	2.20053	2.91979
Ago1	EIF2C1-1	0.418412	0.518601	0.483637	0.522578	0.515168	0.542115	0.41936	0.494835	0.433218	0.473932	0.443894	0.339394	0.337867	0.442687	0.432234	0.43603	0.234435	0.361796	0.263574
Ago1	EIF2C1-3	0.306267	0.350266	0.355628	0.397113	0.405076	0.386917	0.257902	0.348446	0.292304	0.337798	0.2929	0.282527	0.244117	0.291822	0.296232	0.352205	0.182379	0.352183	0.19895
Ago2	EIF2C2-1	1.33381	1.44918	1.74274	1.49289	1.29834	1.31331	0.969349	1.30706	1.04357	0.995714	0.913693	0.711182	0.962659	0.936665	1.15859	0.774586	0.549048	0.582183	0.745552
Ago3	EIF2C3-4	0.208196	0.209539	0.264037	0.293209	0.260212	0.272912	0.209718	0.239615	0.227001	0.21403	0.209252	0.201187	0.212379	0.268615	0.237221	0.250936	0.19055	0.469638	0.242662
Ago4	EIF2C4-1	0.0665809	0.0724965	0.0691382	0.073257	0.0879137	0.0929748	0.0531618	0.0820316	0.0753456	0.0670763	0.0624432	0.0640232	0.0469424	0.0738958	0.0774731	0.107803	0.0837751	0.334859	0.128797
Elp3	ELP3-1	0.440441	0.361634	0.354986	0.348594	0.367211	0.412121	0.474865	0.444939	0.474702	0.427703	0.44216	0.429654	0.393389	0.375856	0.411883	0.509636	0.513685	0.484671	0.383852
Ep300	EP300-2	1.28458	1.5361	2.19734	1.98701	1.57719	1.76046	1.38129	1.50032	1.35877	1.60383	1.56023	1.16674	1.31201	1.35729	1.61196	1.33911	0.689463	0.432139	0.703066
Eras	ERAS-1	0.0102694	0.0116788	0.0222235	0.0133652	0.01827	0.011957	0.00538725	0.0018554	0.00190169	0.00107523	0.00393247	0.0389276	0.0235658	0.0249787	0.0147082	0.0884439	0.0651857	0.466762	0.117309
Ezh1	EZH1-2	0.428501	0.417387	0.378257	0.417006	0.410438	0.552541	0.43187	0.484479	0.408963	0.404705	0.383875	0.413386	0.325906	0.418799	0.425268	0.509943	0.352114	0.408462	0.354732
Ezh1	EZH1-3	0.944463	0.872631	0.875353	0.920193	0.943532	1.1448	0.798541	1.01208	0.968692	0.981719	0.92043	0.883856	0.976881	0.969846	0.953016	1.08702	0.697519	0.551941	0.724418
Ezh2	EZH2-2	0.84876	0.849701	0.760869	0.676499	0.673445	0.547141	0.588076	0.692165	0.763872	0.795157	0.74944	0.908218	0.998442	0.606107	0.781543	0.737996	1.48875	2.81425	1.96393
Gsg2	GSG2-2	0.0928098	0.0895283	0.0748656	0.0754659	0.0807842	0.0636061	0.090996	0.087491	0.100524	0.0822746	0.0803949	0.129087	0.116479	0.0971126	0.109592	0.140597	0.168847	0.407589	0.275137
Hat1	HAT1-1	0.653437	0.632621	0.520419	0.503801	0.580284	0.443804	0.724553	0.513328	0.564731	0.480045	0.63324	0.766381	0.813152	0.682259	0.888913	0.59246	1.16346	1.14874	1.37658
Hcfc1	HCFC1-1	3.33244	3.73487	4.58329	4.22149	3.77883	2.90346	3.34284	3.66048	2.74477	3.44114	3.3337	2.20828	2.78332	2.94146	3.43791	2.53773	0.92867	0.717993	1.28808
Hcfc1	HCFC1-4	1.69479	1.81386	1.96609	1.78652	1.61136	1.59087	1.48962	1.87478	1.73154	1.68487	1.75843	1.43531	1.52958	1.96906	1.92637	1.53752	0.674921	0.629971	0.959536
Hdac1	HDAC1-3	1.90676	1.71194	1.41888	1.61281	1.5703	1.55024	1.72833	1.43247	1.7548	1.8181	1.74033	1.71787	1.63056	1.37752	1.74446	1.66153	2.11882	1.40315	1.72461
Hdac11	HDAC11-1	0.105013	0.0713541	0.0815756	0.0695121	0.0898047	0.106132	0.0991631	0.0859234	0.104387	0.0869581	0.0928446	0.163471	0.11036	0.101868	0.0842248	0.159503	0.229763	0.409608	0.214646
Hdac11	HDAC11-2	0.116842	0.0851283	0.0989024	0.0809651	0.106331	0.121997	0.0947846	0.117864	0.144587	0.123657	0.102996	0.123819	0.110263	0.124856	0.122332	0.16942	0.213635	0.33846	0.249876
Hdac2	HDAC2-3	0.968122	0.885376	0.869117	1.03147	0.909716	0.803745	1.07042	0.817438	0.922334	0.797058	0.836565	0.923889	0.840844	0.898827	0.968437	1.11133	1.37019	0.747151	0.857291
Hdac3	HDAC3-1	0.950447	0.849461	0.748766	0.745713	0.836248	0.87382	0.848328	0.788824	1.04683	0.98492	0.825577	0.998088	0.941831	0.846663	0.788099	0.987787	1.28505	1.11984	1.03329
Hdac3	HDAC3-2	0.992528	0.877229	0.694205	0.746785	0.866144	0.790766	1.12411	0.79399	1.0789	0.909471	1.02352	1.07516	1.06668	1.03114	0.948928	0.986225	1.45562	1.06864	1.27066
Hdac4	HDAC4-1	0.372908	0.457971	0.498914	0.561671	0.436014	0.470095	0.405511	0.49542	0.375341	0.398373	0.406338	0.328327	0.300873	0.403117	0.396987	0.39767	0.227335	0.432126	0.236087
Hdac5	HDAC5-2	0.604768	0.563013	0.34732	0.508077	0.60448	0.633019	1.05448	0.680327	0.63177	0.401708	0.881318	0.67044	0.477354	0.854708	0.834982	0.916541	0.588867	0.625382	0.383914
Hdac6	HDAC6-2	0.289348	0.260384	0.277425	0.228758	0.252234	0.268843	0.312696	0.290712	0.325394	0.29646	0.271815	0.315014	0.252278	0.298906	0.320656	0.374024	0.325549	0.494527	0.379506
Hdac7	HDAC7-1	1.24275	1.39925	1.32497	1.49325	1.58294	1.46062	1.3979	1.68223	1.47238	1.79841	1.37213	1.2615	1.14329	1.09144	1.15002	1.28906	0.541315	0.426382	0.594913
Hdac7	HDAC7-2	0.849124	0.779509	0.780775	0.957945	0.827666	0.917955	0.967122	0.976145	0.840937	1.05676	0.943335	0.780194	0.635338	0.787778	0.766046	0.787307	0.4064	0.514168	0.518744
Hdac8	HDAC8-2	0.137349	0.12444	0.160414	0.130981	0.130602	0.147545	0.169209	0.133893	0.129738	0.131382	0.171739	0.14464	0.154975	0.165393	0.154053	0.202296	0.191415	0.56797	0.192704
Hdac9	HDAC9-1	0.203383	0.141265	0.136208	0.146225	0.140161	0.232733	0.197771	0.162188	0.145298	0.175938	0.184688	0.186419	0.192703	0.218162	0.202935	0.273474	0.25208	0.348479	0.252262
Hdac9	HDAC9-2	0.512533	0.479384	0.62067	0.496308	0.524416	0.618976	0.487864	0.532775	0.483137	0.56726	0.513543	0.536585	0.473568	0.540491	0.507596	0.560721	0.53511	0.390407	0.336218
Hesx1	HESX1-1	0.00757096	0.0124512	0.0201845	0.0121624	0.0137872	0.0116582	0.00516021	0.0019653	0.00261508	0.00101855	0.00271551	0.0341902	0.0214613	0.0133005	0.0132801	0.0624096	0.0442377	0.388074	0.129382
Hif1a	HIF1A-1	1.24164	0.884502	0.770703	0.861812	0.822992	0.86833	1.73639	1.14935	1.21615	0.98785	1.20856	1.47973	1.26817	1.6539	1.35149	1.85928	1.63217	1.28002	1.30045
Hoxa1	HOXA1-1	0.0157115	0.0234248	0.0298997	0.0240879	0.0232757	0.0172546	0.0125995	0.00793708	0.00489254	0.00575518	0.00892337	0.0466941	0.0273936	0.0259872	0.0257668	0.0825526	0.0742813	0.419605	0.103175
Hoxb1	HOXB1-3	0.0139754	0.0238778	0.0305165	0.0194034	0.0236623	0.0145109	0.00653492	0.00101962	0.00116742	0.000305898	0.00508413	0.0623364	0.0212287	0.0217977	0.0211981	0.0947303	0.0774547	0.476603	0.158095
Jarid2	JARID2-1	1.26172	1.13615	1.33101	1.14959	1.19606	1.25756	1.26324	1.30802	1.1054	1.15791	1.15512	1.13589	1.01686	1.09916	1.14574	1.0306	0.72492	0.649152	0.931109
Jarid2	JARID2-3	0.518382	0.527663	0.523681	0.552707	0.552739	0.61768	0.383739	0.522395	0.495456	0.47551	0.421279	0.38106	0.378679	0.429114	0.471521	0.426601	0.281372	0.389906	0.316274
Kdm7a	JHDM1D-3	1.43742	1.42955	1.5561	1.51452	1.47222	1.56201	1.33513	1.386	1.30343	1.28757	1.26446	1.20932	1.3939	1.22367	1.35779	1.10082	0.941788	0.727367	1.35915
Kdm7a	JHDM1D-4	1.23829	1.15521	1.44034	1.21829	1.26315	1.28346	0.962636	1.13716	1.23869	0.937685	1.04441	0.952714	1.2054	1.16718	1.20184	1.01545	0.937232	0.620227	1.1738
Jmjd4	JMJD4-1	0.186965	0.219054	0.196477	0.230204	0.209887	0.222001	0.169444	0.156372	0.183442	0.208707	0.182207	0.163978	0.163916	0.181175	0.199083	0.245849	0.182347	0.451565	0.213374
Jmjd6	JMJD6-1	1.0703	0.935319	0.747785	0.963616	0.929624	1.16536	0.809375	0.688126	0.879182	0.825867	0.947829	0.766279	0.798851	0.880633	0.829598	0.680193	1.22363	0.738829	0.78142
Jmjd6	JMJD6-2	0.691565	0.597828	0.549939	0.660261	0.640427	0.793261	0.61292	0.582146	0.758528	0.679936	0.713618	0.672245	0.631553	0.596851	0.62892	0.683825	0.947014	0.882105	0.640148
Jmjd7	JMJD7-1	0.22451	0.209504	0.131729	0.205627	0.207686	0.208518	0.448872	0.19432	0.226502	0.14291	0.277813	0.453794	0.23704	0.32117	0.286612	0.354342	0.380153	1.13636	0.405986
Jmjd8	JMJD8-1	2.40749	2.20113	1.5827	1.95707	2.31242	2.09463	3.88241	2.7162	2.94378	2.2224	2.6794	3.08102	2.51496	3.03291	3.06625	3.09788	3.43092	2.3409	2.79297
Kansl1	KANSL1-3	1.93043	1.96645	2.2484	2.27059	2.15768	2.21082	2.05774	2.54837	2.03516	2.17509	1.89571	1.52252	1.73062	1.97854	2.00372	1.78516	1.26938	0.928342	0.969149
Kat2a	KAT2A-1	1.29925	1.03303	0.801857	1.00437	0.932413	1.00316	0.699278	0.961086	1.17033	0.97588	0.758979	0.66429	0.700041	0.795565	0.811814	0.96839	0.666065	0.527886	0.467749
Kat2b	KAT2B-5	0.225038	0.250038	0.230451	0.22502	0.224611	0.253971	0.173018	0.193815	0.17863	0.182319	0.177563	0.167996	0.22346	0.200381	0.217176	0.225686	0.301197	0.45711	0.291255
Kat5	KAT5-1	0.805364	0.697144	0.634033	0.658841	0.681243	0.831725	0.712681	0.828736	0.911916	0.904535	0.707578	0.913484	0.781458	0.777895	0.748423	0.810762	0.889606	0.865392	0.740279
Kat6a	KAT6A-2	2.24966	2.07418	2.14518	2.18668	1.98907	2.21792	1.83543	3.36288	2.61676	2.05298	1.9868	2.10671	1.71141	2.39639	2.23205	2.43307	0.606365	0.847074	0.858373
Kat6b	KAT6B-1	0.285664	0.301088	0.345826	0.357045	0.36279	0.340626	0.269845	0.361624	0.292407	0.328723	0.293693	0.221515	0.247013	0.274843	0.303112	0.380241	0.161764	0.42631	0.274673
Kat7	KAT7-3	1.36337	1.2674	1.18172	1.39761	1.32548	1.33287	1.05967	1.34725	1.29093	1.26098	1.09093	0.890586	1.08144	1.21547	1.21615	1.06064	0.78671	0.618105	0.858512
Kat7	KAT7-4	0.939196	0.927276	0.904006	0.886863	0.883184	0.897142	0.884923	0.988825	0.941796	0.956485	0.92741	0.790724	0.849987	0.901858	0.86377	0.890553	0.637722	0.538758	0.624657
Kat8	KAT8-2	0.0180994	0.0264293	0.0255071	0.0212146	0.0238342	0.0285457	0.0364629	0.0181033	0.0236977	0.0206142	0.0269695	0.0413927	0.0328182	0.0343223	0.0291343	0.051244	0.0367321	0.118559	0.0614639
Kdm1a	KDM1A-1	0.625118	0.552201	0.565944	0.521663	0.544066	0.559453	0.564379	0.600821	0.604138	0.630423	0.561552	0.649809	0.588793	0.560431	0.570257	0.56972	0.660906	0.540156	0.499634
Kdm1b	KDM1B-1	0.285216	0.28495	0.29351	0.307905	0.319916	0.315002	0.242879	0.266129	0.296059	0.297511	0.23589	0.295196	0.289037	0.283212	0.26486	0.377069	0.36517	0.627308	0.38077
Kdm1b	KDM1B-2	0.340454	0.401096	0.356427	0.36413	0.393273	0.423783	0.362018	0.376031	0.325637	0.349469	0.325256	0.382896	0.336035	0.369354	0.342141	0.55759	0.445281	0.578772	0.397923
Kdm2a	KDM2A-1	2.32821	2.35208	2.92141	2.78522	2.80559	2.60318	2.33092	2.86646	2.25109	2.68652	2.31549	2.12183	2.11929	2.06955	2.3855	2.22201	1.1263	0.344352	1.13322
Kdm2a	KDM2A-5	1.24313	1.60272	2.00667	1.8104	1.61268	1.82832	1.55134	1.53363	1.34074	1.77081	1.75619	1.64138	1.44099	1.64157	1.72164	1.33059	0.771316	0.773745	1.11605
Kdm2b	KDM2B-1	0.311518	0.335102	0.283826	0.363201	0.300229	0.292203	0.329943	0.274066	0.250654	0.269798	0.282892	0.242432	0.235732	0.261973	0.342253	0.36738	0.234907	0.360863	0.21892
Kdm2b	KDM2B-2	1.11433	1.17354	1.04525	1.22226	1.06273	1.24813	0.880526	1.08043	0.887265	1.25454	1.11166	0.927544	0.862637	1.11755	1.17926	1.03295	0.703192	0.66553	0.662992
Kdm3a	KDM3A-1	0.522603	0.375107	0.418895	0.467798	0.40527	0.452675	0.319298	0.367224	0.401474	0.362238	0.350258	0.377687	0.342881	0.375686	0.366178	0.405589	0.422568	0.638265	0.441155
Kdm3a	KDM3A-4	0.572434	0.549564	0.506333	0.611719	0.532374	0.58191	0.551658	0.496781	0.55295	0.50104	0.561836	0.534171	0.544041	0.527696	0.485649	0.583454	0.653782	0.861585	0.671921
Kdm3b	KDM3B-3	1.24467	1.41951	1.19749	1.40733	1.42982	1.50875	1.20921	1.80184	1.37283	1.39834	1.37229	1.1203	1.07244	1.44411	1.35618	1.26658	0.663637	0.485564	0.719926
Kdm4a	KDM4A-2	0.862306	0.970721	0.840031	0.970787	0.922368	1.00401	0.705988	0.920788	0.837017	0.964709	0.83233	0.716576	0.690939	0.875275	0.832844	0.806415	0.581005	0.475145	0.701248
Kdm4b	KDM4B-2	0.468932	0.454526	0.470277	0.541157	0.517797	0.542101	0.423869	0.527047	0.49683	0.511339	0.461725	0.399578	0.39308	0.477551	0.452097	0.487476	0.336301	0.488546	0.354158
Kdm4b	KDM4B-3	0.477815	0.524905	0.488315	0.587889	0.611296	0.57809	0.456526	0.602769	0.460546	0.510251	0.468658	0.424813	0.321995	0.469617	0.471233	0.522242	0.290328	0.454919	0.262554
Kdm4c	KDM4C-1	0.329572	0.369406	0.343225	0.336369	0.373772	0.367272	0.512615	0.355812	0.389396	0.410543	0.462575	0.505516	0.441446	0.497671	0.494113	0.48877	0.558815	0.622716	0.496345
Kdm4c	KDM4C-3	0.573101	0.557174	0.581968	0.744759	0.565392	0.796532	0.489077	0.489059	0.592901	0.562891	0.468092	0.394309	0.527973	0.645406	0.596898	0.518601	0.70175	0.728215	0.582367
Kdm4d	KDM4D-1	0.0165794	0.020275	0.0329281	0.0209827	0.0229109	0.0204299	0.0131765	0.0104945	0.00825918	0.00778336	0.0124708	0.0629593	0.0254075	0.0286871	0.02855	0.0867257	0.0627943	0.47089	0.111892
Kdm4d	KDM4D-2	0.00904887	0.013713	0.0198279	0.0165184	0.018052	0.0149683	0.00795175	0.00679148	0.00581253	0.00688788	0.00443396	0.0318575	0.0206851	0.0187659	0.0165251	0.0567602	0.0552058	0.477036	0.1202
Kdm5a	KDM5A-4	0.682955	0.654148	0.555434	0.591405	0.648795	0.593347	1.56706	0.699402	0.731778	0.547116	0.995327	1.49883	0.765909	0.991779	0.953328	1.12095	0.924613	3.14153	1.19802
Kdm5a	KDM5A-5	0.791708	0.785553	0.655404	0.755136	0.803536	0.883344	0.848252	0.778255	0.777232	0.737732	0.791235	0.829009	0.692418	0.929888	0.760578	0.914188	0.699396	0.594561	0.640806
Kdm5b	KDM5B-1	0.548887	0.594634	0.580571	0.632039	0.585122	0.60645	0.614022	0.559644	0.491985	0.537547	0.600059	0.601204	0.552577	0.49299	0.569472	0.548929	0.457752	0.579303	0.532258
Kdm5c	KDM5C-1	0.430674	0.875785	1.01659	0.782542	0.75421	0.804035	0.867599	0.734012	0.531173	0.726853	0.811338	0.651231	0.903521	0.77057	0.722773	0.654705	0.502771	0.622818	0.68476
Kdm5c	KDM5C-2	1.64282	1.73381	1.78846	1.84996	1.77874	1.63849	1.7982	1.62994	1.60938	1.74485	1.52967	1.37157	1.40049	1.38253	1.53268	1.47282	1.23	0.713867	1.18586
Kdm6a	KDM6A-1	1.61764	1.58539	1.39938	1.45541	1.62548	1.55536	1.34061	1.59104	1.83863	1.64153	1.47481	1.02985	1.65645	1.54567	1.66114	1.48085	1.41938	0.478318	1.29833
Kdm6a	KDM6A-2	1.15424	1.01526	1.07244	0.970591	1.15317	1.26158	0.901953	1.11503	1.15775	0.977165	0.957955	0.773225	1.16951	1.06956	1.28348	1.18799	0.93668	0.47446	0.997685
Kdm6b	KDM6B-3	0.982906	0.996694	1.26124	1.35521	1.20109	1.15506	0.998021	1.01597	0.829412	1.15314	1.15911	0.77272	0.636283	0.807914	0.812419	0.747604	0.271486	0.412592	0.422724
Kdm8	KDM8-1	0.110963	0.12263	0.107491	0.119771	0.130996	0.113195	0.112134	0.117906	0.106075	0.110874	0.0955732	0.12951	0.117872	0.106853	0.1403	0.187122	0.126807	0.33834	0.19602
Kdm8	KDM8-3	0.109347	0.102878	0.0820082	0.0834629	0.10522	0.09426	0.0919358	0.0959074	0.100854	0.105536	0.101084	0.11341	0.11103	0.0930455	0.111586	0.142448	0.133464	0.363849	0.217844
Lbr	LBR-1	3.47538	3.62154	3.20837	3.31858	4.30896	3.07581	3.16031	3.36015	3.20932	3.2177	3.83797	3.04111	4.41752	3.15926	4.48325	2.76267	4.64257	3.56791	7.81981
Lefty1	LEFTY1-2	0.0549652	0.0463507	0.0366558	0.0424205	0.0479707	0.0448676	0.0604384	0.039827	0.0535496	0.0388578	0.0491064	0.0888875	0.0745171	0.0566512	0.0653888	0.113868	0.141638	0.37548	0.203516
Lefty2	LEFTY2-2	0.00873154	0.0134636	0.0179094	0.013311	0.0168855	0.0165887	0.00913338	0.00194355	0.00119356	0.000887214	0.00275785	0.0294706	0.0202675	0.0172706	0.0233029	0.0847569	0.0537229	0.427103	0.118244
Lin28a	LIN28A-1	0.00926388	0.0165508	0.0257538	0.0162459	0.0172885	0.0134985	0.00662912	0.00200797	0.00285444	0.00153398	0.00559961	0.0444666	0.021936	0.0224628	0.0225677	0.0849161	0.0573819	0.401134	0.130269
Lmna	LMNA-1	0.887043	0.694098	0.615931	0.476359	0.526347	0.380646	0.491965	0.474414	0.524	0.351065	0.542837	0.510488	0.949702	0.457133	0.919612	0.390033	1.0661	0.952146	1.58878
Lmx1b	LMX1B-1	0.0106972	0.0247044	0.0312567	0.0202157	0.0321052	0.0186194	0.00758444	0.00134624	0.00122858	0.00101256	0.00753027	0.0560227	0.0273067	0.0316632	0.026026	0.107649	0.0815314	0.521196	0.159206
Mad1l1	MAD1L1-1	0.62505	0.641884	0.677221	0.593772	0.631522	0.487455	0.52511	0.50444	0.5355	0.495369	0.533738	0.575687	0.714393	0.511529	0.68958	0.640247	0.461565	0.614426	0.647763
Mbd3	MBD3-2	1.98241	1.59304	1.4535	1.75925	1.8094	1.66259	2.50801	1.80806	1.94197	1.50722	2.11033	2.59352	2.00165	2.20609	2.21627	2.18783	2.47271	1.33618	1.97078
Mbd3	MBD3-3	1.97115	2.08989	1.60083	2.15998	2.13792	2.01427	2.74999	2.0067	2.04212	1.83469	2.27151	2.3374	2.24026	2.41132	2.462	2.47872	2.56757	1.51819	1.87482
Meis1	MEIS1-1	0.164194	0.182908	0.182407	0.193051	0.199165	0.228001	0.12176	0.224821	0.194276	0.153209	0.1492	0.161157	0.158661	0.166045	0.182604	0.230835	0.209062	0.521848	0.239066
Meis1	MEIS1-4	0.214802	0.184589	0.20826	0.205572	0.218496	0.245775	0.16852	0.258234	0.254121	0.210909	0.200402	0.237887	0.207893	0.224028	0.200622	0.305461	0.241711	0.454043	0.232832
Meox2	MEOX2-1	0.0149538	0.0262036	0.0287649	0.0254174	0.0329336	0.0190997	0.0178984	0.0105136	0.00975529	0.00716855	0.0124115	0.0623208	0.0225696	0.0267685	0.0320476	0.134159	0.0560486	0.429106	0.101796
Meox2	MEOX2-2	0.012201	0.0147535	0.0231758	0.0149135	0.023741	0.0161811	0.0094729	0.0115564	0.0083796	0.0106037	0.0133383	0.0482072	0.0153415	0.0223959	0.0266417	0.0899884	0.0579165	0.300013	0.0919861
Kmt2a	MLL-4	1.32485	1.66484	2.01037	2.20574	1.88545	1.77721	1.66292	2.08092	1.37755	1.46908	1.58433	1.18167	1.18375	1.60937	1.63965	1.44149	0.449366	0.660001	0.575078
Kmt2a	MLL-6	1.43246	1.60065	2.45008	2.22841	2.00036	1.73032	1.70824	2.37279	1.47359	1.49487	1.87201	1.32051	1.09089	1.68439	1.6372	1.39153	0.312325	0.365936	0.573603
Mtf2	MTF2-1	0.373796	0.348097	0.302234	0.348845	0.33866	0.327185	0.362229	0.291425	0.374986	0.367319	0.33029	0.330968	0.342104	0.367382	0.389894	0.371288	0.576472	0.528334	0.427587
Mtf2	MTF2-2	0.507821	0.47176	0.377853	0.437557	0.435685	0.390335	0.372667	0.39152	0.476378	0.486846	0.455653	0.434655	0.439944	0.415046	0.442852	0.501155	0.504224	0.741569	0.464723
Nanog	NANOG-1	0.00653053	0.0134314	0.0233658	0.0172725	0.0157037	0.0122706	0.00399526	0.00195315	0.00144501	0.000981612	0.00324562	0.0424731	0.0179319	0.0163259	0.0179843	0.0823826	0.0638369	0.480829	0.12595
Ncor2	NCOR2-2	1.10448	1.34873	1.7969	1.82593	1.65645	1.43354	1.40752	1.97431	1.26447	1.3021	1.38626	1.03109	0.910244	1.09357	1.35702	1.02348	0.267669	0.3211	0.35871
Ncor2	NCOR2-4	0.398147	0.486286	0.567899	0.560317	0.569638	0.536284	0.631007	0.597459	0.472711	0.436132	0.643345	0.540581	0.381397	0.513856	0.621794	0.494603	0.302823	0.619333	0.363389
Neurog1	NEUROG1-1	0.0175478	0.0284514	0.0293889	0.0218079	0.0275997	0.0181883	0.00896017	0.002876	0.00187355	0.000617526	0.0064795	0.0603716	0.0226894	0.0307615	0.0241197	0.122102	0.0637152	0.462546	0.120708
Nkx2-2	NKX2.2-2	0.00718695	0.0161906	0.0290248	0.0155668	0.0215779	0.0154495	0.00480122	0.00270493	0.00276547	0.0023727	0.00416917	0.0406036	0.0185625	0.0209148	0.0202744	0.0878926	0.0510065	0.396535	0.135858
Nkx2-2	NKX2.2-3	0.00600585	0.0120387	0.0226515	0.0135644	0.0136501	0.0101443	0.00480465	0.0020989	0.00273297	0.00113408	0.00375436	0.0278779	0.0135838	0.0177489	0.0173397	0.0675607	0.0438185	0.352156	0.112163
Nodal	NODAL-1	0.00903989	0.0176441	0.0234399	0.0174127	0.0174597	0.0135411	0.00824108	0.00256999	0.00348821	0.00329386	0.00500267	0.0431957	0.0224938	0.0195173	0.0179538	0.083898	0.0633834	0.464491	0.100679
Nodal	NODAL-2	0.00977989	0.0165908	0.0243769	0.0183523	0.0207329	0.020934	0.00725835	0.00427981	0.00897436	0.00552932	0.00897982	0.042886	0.0254633	0.0249688	0.0256354	0.114751	0.0693824	0.520812	0.131086
Nsd1	NSD1-2	1.47509	1.61267	1.61949	1.79718	1.6621	1.77795	1.69078	2.07148	1.62356	1.52854	1.57676	1.21372	1.15755	1.30181	1.4722	1.37492	0.608617	0.341897	0.741626
Ogt	OGT-2	2.18235	2.00276	2.21833	2.35129	2.09059	2.46788	2.02896	2.41136	2.80188	2.38399	2.00725	1.86441	2.11274	2.29637	2.00242	1.93126	2.11288	1.10943	1.99084
Onecut1	ONECUT1-1	0.00928582	0.0151472	0.0193665	0.0153615	0.0134531	0.0110096	0.00546849	0.0010203	0.00209196	0.000520986	0.00197027	0.034915	0.0129039	0.0186301	0.020097	0.0770506	0.05294	0.402796	0.108529
Onecut1	ONECUT1-6	0.0108197	0.0133587	0.0304193	0.015206	0.0219021	0.017502	0.0124317	0.00413947	0.00375018	0.00182634	0.00672377	0.0590811	0.024247	0.0223846	0.0239553	0.0966937	0.0728253	0.402792	0.145985
Otx1	OTX1-3	0.026506	0.0509669	0.0545736	0.0444162	0.0408652	0.0238132	0.031581	0.00898384	0.00856085	0.00320407	0.0149813	0.0895005	0.0448624	0.0555442	0.0452615	0.197196	0.111671	0.888605	0.22752
Otx1	OTX1-5	0.018609	0.0411171	0.0473177	0.0344088	0.0328828	0.0292139	0.0142153	0.0034831	0.00894563	0.00245909	0.0136094	0.0662916	0.0328131	0.0460003	0.0451343	0.19054	0.0857036	0.897537	0.176569
Otx2	OTX2-1	0.00616319	0.00957159	0.014778	0.0109668	0.0134598	0.00928484	0.00314884	0.00129997	0.000644369	0.000447778	0.00226156	0.0295427	0.0169935	0.0136664	0.0157464	0.0741891	0.0503442	0.334161	0.0916948
Otx2	OTX2-3	0.00532375	0.0112934	0.019899	0.0114246	0.0138384	0.0123833	0.00250488	0.00141791	6.44858e-05	0.00151023	0.00215731	0.0333295	0.0220076	0.0208331	0.016538	0.0887325	0.0495882	0.387822	0.117822
Padi4	PADI4-1	0.0711557	0.0463726	0.0578032	0.0481666	0.032571	0.0475848	0.0346779	0.0346996	0.0407798	0.0464288	0.040638	0.0923832	0.0625598	0.0685762	0.068935	0.133797	0.183592	0.41414	0.146049
Parp1	PARP1-1	2.35404	2.15034	2.02878	2.14807	1.99016	2.09454	2.09966	2.38015	2.34956	2.32221	2.27867	2.24318	2.1262	2.15856	2.25505	2.25794	1.6166	0.766281	1.38141
Parp10	PARP10-1	0.573497	0.613791	0.491197	0.621266	0.535914	0.564553	0.437785	0.548066	0.553681	0.499158	0.438585	0.415269	0.365644	0.423965	0.483184	0.460113	0.516612	0.609155	0.333004
Parp10	PARP10-3	0.810242	0.893933	0.785296	0.862737	0.876578	1.02957	1.03359	0.852639	1.02029	0.998219	0.949487	0.891226	0.922933	0.873961	0.897191	0.83433	0.833903	0.680673	0.721366
Parp11	PARP11-3	0.362621	0.359171	0.343659	0.399251	0.446652	0.369831	0.301464	0.354626	0.346741	0.313612	0.317985	0.30559	0.285935	0.325516	0.309505	0.336947	0.282566	0.510855	0.266068
Parp11	PARP11-4	0.403894	0.358636	0.390856	0.386274	0.422724	0.359073	0.384571	0.367248	0.321429	0.35677	0.347324	0.33704	0.320029	0.373897	0.337344	0.416687	0.306014	0.479441	0.355172
Parp12	PARP12-1	0.493844	0.615331	0.498289	0.521861	0.468075	0.533167	0.428202	0.469246	0.598177	0.545631	0.447463	0.546563	0.591182	0.520215	0.527558	0.537364	1.2043	1.29926	0.738668
Parp14	PARP14-1	0.83861	0.844773	0.784811	0.838446	0.743803	0.853527	0.565159	0.800155	0.847424	0.84114	0.603695	0.606843	0.680141	0.66902	0.621687	0.739062	0.956429	0.928051	0.654062
Parp16	PARP16-1	0.0835665	0.076484	0.0830589	0.0692024	0.0827258	0.0906281	0.0517076	0.0471341	0.0776615	0.0584392	0.0617835	0.0652246	0.0969279	0.0760388	0.0974246	0.105393	0.134813	0.404501	0.211002
Parp16	PARP16-2	0.076414	0.0566444	0.0667636	0.0557454	0.0702239	0.0536573	0.077849	0.0522545	0.0684511	0.0385387	0.0594301	0.0912841	0.100888	0.0843486	0.0861419	0.106403	0.133337	0.421301	0.232282
Parp2	PARP2-2	0.573348	0.529087	0.42425	0.476755	0.571479	0.520684	0.666851	0.527681	0.64746	0.510753	0.518334	0.657882	0.624911	0.576133	0.564563	0.61448	0.701489	0.67012	0.628987
Parp3	PARP3-1	1.20973	1.37007	1.34708	1.9259	1.62477	1.68108	1.11605	1.21525	1.3774	1.47298	1.10853	1.30405	1.31678	1.47374	1.12032	1.38441	1.35221	0.829902	1.02266
Parp3	PARP3-2	0.608411	0.793116	0.780814	1.02966	0.965758	0.925185	0.805117	0.724074	0.746629	0.819448	0.686341	1.11149	0.879881	0.98716	0.76597	0.955599	0.973026	1.01829	0.963585
Parp4	PARP4-1	0.743708	0.951263	0.976757	1.05413	0.937097	1.05837	0.95346	1.10435	0.676357	0.929796	0.870316	0.791054	0.795104	0.954926	0.845633	0.736298	0.62244	0.552186	0.663732
Parp6	PARP6-1	0.394313	0.356134	0.358775	0.377971	0.416956	0.42828	0.490739	0.350637	0.444989	0.366988	0.400711	0.44297	0.328653	0.355004	0.371094	0.459199	0.420438	0.469145	0.406835
Parp6	PARP6-2	0.370422	0.364064	0.361448	0.335519	0.370859	0.3651	0.345254	0.352385	0.409529	0.344955	0.33989	0.388529	0.298626	0.344079	0.302532	0.438962	0.395747	0.476861	0.333147
Parp8	PARP8-1	0.628776	0.610445	0.77748	0.83551	0.692697	0.804607	0.931721	0.828041	0.75324	0.852761	0.576036	0.638447	0.656794	0.708611	0.718125	0.598574	0.547119	0.470489	0.401424
Parp8	PARP8-2	0.909885	0.979594	0.910579	1.10618	0.99719	1.01409	0.868763	0.972831	1.04165	1.12648	0.980132	0.859909	0.839362	0.931439	0.831908	0.925705	0.763467	0.70386	0.657146
Parp9	PARP9-2	1.06648	1.10006	0.743962	0.886289	0.874339	0.886849	0.97939	0.962055	1.11239	1.09882	0.926944	0.951037	0.975048	1.18081	0.987419	1.02313	1.56608	1.05556	1.14459
Pax7	PAX7-2	0.0090278	0.0203845	0.0283676	0.0181776	0.023057	0.0148966	0.00435412	0.00190675	0.00255063	0.00127151	0.00493947	0.0561675	0.0207643	0.0238581	0.0224202	0.0867555	0.075952	0.519675	0.124351
Pax	PAX73	0.0108269	0.0134196	0.0274965	0.0139408	0.0168531	0.0164205	0.00611027	0.00276927	0.00729237	0.00155071	0.0031439	0.0434191	0.0191826	0.0211423	0.0211709	0.077792	0.0532795	0.427949	0.132319
Pcgf2	PCGF2-1	0.127073	0.113886	0.155451	0.137957	0.127394	0.148822	0.121703	0.142144	0.124104	0.143537	0.137715	0.168898	0.145706	0.166268	0.159137	0.243504	0.16871	0.490094	0.201614
Pcgf3	PCGF3-1	0.367581	0.438761	0.39504	0.442595	0.370446	0.452126	0.243819	0.303542	0.339392	0.334031	0.276497	0.235624	0.301554	0.249598	0.342931	0.376879	0.315255	0.466501	0.311851
Pcgf3	PCGF3-2	0.396417	0.383952	0.413133	0.394732	0.369808	0.37915	0.33273	0.361762	0.366069	0.37886	0.332121	0.310715	0.36661	0.33372	0.40594	0.337976	0.385446	0.543364	0.518783
Pcgf5	PCGF5-1	0.37603	0.354521	0.336969	0.345655	0.389174	0.368243	0.4403	0.344388	0.399292	0.294311	0.352012	0.390424	0.427282	0.370089	0.431513	0.384173	0.481489	0.611221	0.558715
Pcyox1	PCYOX1-1	0.537229	0.525243	0.395063	0.494005	0.446221	0.577795	0.363377	0.418553	0.484259	0.510048	0.384079	0.409831	0.390351	0.438081	0.442724	0.532893	0.725663	0.655379	0.478053
Phc1	PHC1-1	0.193295	0.159009	0.195585	0.174538	0.210867	0.215014	0.212211	0.212586	0.19214	0.2029	0.22351	0.215035	0.151528	0.214372	0.194724	0.25068	0.116509	0.31437	0.194353
Phc1	PHC1-2	0.220054	0.212404	0.192604	0.201425	0.233639	0.222577	0.217449	0.221299	0.234089	0.217228	0.220822	0.217965	0.183177	0.240141	0.180181	0.255653	0.136927	0.358289	0.208417
Phc2	PHC2-1	3.20154	2.90645	2.7601	3.02774	2.82291	3.22184	2.47332	2.62869	3.04601	2.95588	2.38822	2.51105	2.30855	2.64129	2.88235	2.81306	3.02575	0.906673	1.85103
Phc2	PHC2-2	2.11467	1.66825	1.62743	1.5682	1.86483	1.9855	1.32625	1.50542	2.04476	1.67101	1.54655	1.45312	1.38092	1.47787	1.42325	1.69387	2.00298	0.958139	1.10009
Phc3	PHC3-4	1.77044	1.76145	2.17022	2.05476	2.09336	2.04603	1.65376	1.93048	1.77664	1.86513	1.81824	1.54693	1.48547	1.94551	1.81686	1.71959	0.825586	0.508928	1.03459
Phf19	PHF19-1	0.146468	0.169476	0.139748	0.171039	0.11174	0.134845	0.135067	0.14002	0.147693	0.230366	0.161262	0.157618	0.147311	0.133028	0.130029	0.20346	0.134907	0.481936	0.149698
Phf19	PHF19-2	0.155447	0.172442	0.189091	0.176057	0.154458	0.149445	0.15126	0.150708	0.178038	0.186145	0.147941	0.162274	0.132206	0.131057	0.142406	0.250182	0.215231	0.645354	0.264118
Phf8	PHF8-3	0.4838	0.627395	0.637978	0.601755	0.610823	0.554582	0.486703	0.639172	0.576572	0.576254	0.559832	0.47894	0.481945	0.540138	0.543253	0.530356	0.416135	0.510516	0.394536
Pou5f1	POU5F1-1	0.0256377	0.0350107	0.0417705	0.0443877	0.035603	0.0351876	0.0214684	0.0238516	0.0154371	0.0148033	0.0154942	0.0417706	0.0258288	0.0308939	0.0315182	0.0817857	0.0624666	0.403226	0.103748
Prdm2	PRDM2-3	0.415159	0.412568	0.37548	0.493992	0.489777	0.491157	0.400402	0.451908	0.414421	0.418855	0.389248	0.36252	0.328436	0.429687	0.417486	0.40849	0.322492	0.606983	0.313695
Prdm9	PRDM9-4	0.0811514	0.0871786	0.101074	0.0991709	0.0937901	0.0995126	0.0957391	0.0994555	0.0967185	0.0824356	0.0816215	0.10709	0.0838971	0.0902404	0.0951046	0.124823	0.0932364	0.283528	0.140433
Prmt1	PRMT1-4	1.68773	1.31241	1.05071	1.23298	1.29766	1.24059	1.63793	1.38091	1.7016	1.56159	1.57881	1.70641	1.53471	1.48875	1.59524	1.70406	3.14346	2.61571	1.75983
Prmt2	PRMT2-1	0.203463	0.178265	0.155442	0.206857	0.219264	0.205882	0.318082	0.213988	0.229899	0.155521	0.233454	0.342607	0.213062	0.248539	0.28042	0.369784	0.44939	0.578611	0.32078
Prmt2	PRMT2-2	0.172505	0.187062	0.158114	0.214135	0.191191	0.24246	0.157439	0.146783	0.178856	0.169842	0.174375	0.175519	0.178151	0.191636	0.208549	0.253643	0.342235	0.382593	0.264193
Prmt5	PRMT5-1	0.972	1.00608	0.81879	0.968177	0.852924	0.830288	0.840084	0.73693	0.948858	0.933602	0.853979	0.979135	0.983163	0.77033	0.914181	0.839085	1.12019	0.994204	1.14724
Prmt5	PRMT5-3	1.18262	1.13757	1.07741	1.06257	1.13626	1.16384	1.0219	0.956243	1.27226	1.21383	1.06697	1.1747	1.16928	1.01783	1.10061	1.16253	1.28277	1.00905	1.11516
Prmt6	PRMT6-1	0.0770144	0.101781	0.113446	0.116752	0.106919	0.119477	0.0943804	0.0868909	0.0998498	0.0882079	0.0838769	0.135477	0.108564	0.115744	0.10193	0.152826	0.129521	0.284626	0.139234
Prmt6	PRMT6-3	0.226821	0.240428	0.220527	0.299765	0.248749	0.294372	0.263236	0.197024	0.276839	0.255083	0.238428	0.244309	0.233763	0.267066	0.22855	0.269688	0.284397	0.291953	0.242918
Prmt7	PRMT7-1	0.352619	0.31458	0.24035	0.3143	0.300881	0.284928	0.274505	0.278042	0.334586	0.303771	0.25475	0.315908	0.312788	0.290096	0.313767	0.351927	0.563597	0.583083	0.425308
Pten	PTEN-2	2.35206	2.61534	2.97572	3.05178	2.77263	3.09522	2.43604	2.33003	2.62966	2.79112	2.2253	2.04574	2.27645	2.30381	2.43276	2.44106	1.82752	0.757712	1.35589
Polr2a	Polr2a-3	2.16531	2.33867	2.2695	2.35553	2.4326	2.42525	2.02901	2.69558	2.45748	2.52925	2.3091	1.8424	2.04745	2.28804	2.13725	2.14766	1.09747	0.799473	1.04672
Polr2a	Polr2a-4	1.73101	2.13249	2.06763	2.24509	1.99132	2.12422	1.76691	2.26133	1.79562	1.95031	1.89421	1.4876	1.54976	1.69019	1.86757	1.78622	0.817239	0.567635	0.762941
Polr2b	Polr2b-2	0.800621	0.740538	0.648593	0.677742	0.707832	0.698072	0.748138	0.683637	0.666811	0.671096	0.678257	0.71577	0.747686	0.733522	0.758473	0.753458	0.649855	0.450836	0.530574
Rbbp4	RBBP4-6	1.74267	1.55915	1.48665	1.45087	1.41384	1.32739	1.61699	1.38532	1.817	1.62784	1.6055	1.95646	2.03171	1.6005	1.76969	1.67833	3.46999	2.73506	2.83124
Rbbp7	RBBP7-4	1.33564	1.09141	1.08234	1.08546	1.17464	0.944401	2.01971	1.28176	1.55152	0.992129	1.67322	1.8152	1.62106	1.61842	1.64241	1.7241	2.23737	1.32261	1.70455
Rbl2	RBL2-2	0.806504	0.817161	0.860145	0.866218	0.759488	0.923042	0.792468	0.85702	0.781399	0.932754	0.836464	0.636017	0.823659	0.846613	0.815794	0.909652	0.758399	0.416451	0.708404
Ring1	RING1-1	0.741933	0.66499	0.574833	0.638274	0.766253	0.716988	0.749454	0.732669	0.906265	0.797266	0.775726	0.898099	0.846223	0.808088	0.692502	0.876155	1.08342	1.2444	0.89224
Rnf168	RNF168-1	0.425556	0.458529	0.427148	0.406419	0.419921	0.361935	0.266898	0.31653	0.35307	0.327778	0.304968	0.274014	0.32828	0.284733	0.36411	0.365131	0.499023	0.468787	0.416208
Rnf20	RNF20-3	0.606337	0.671489	0.61732	0.685006	0.666168	0.583864	0.561808	0.599319	0.544927	0.62495	0.550329	0.580557	0.518884	0.569635	0.651168	0.657737	0.530159	0.450993	0.495978
Rnf24	RNF24-3	0.0523049	0.0474524	0.0579344	0.0631738	0.0533314	0.0528429	0.0458045	0.0455561	0.0438078	0.0456712	0.0467018	0.0642486	0.0435344	0.0519917	0.0530144	0.101439	0.066032	0.287503	0.0929584
Rnf25	RNF25-4	0.585419	0.556094	0.487986	0.50007	0.621844	0.624974	0.546453	0.52079	0.574345	0.555985	0.546696	0.566473	0.550883	0.581888	0.550736	0.633337	0.877379	0.774785	0.529135
Rnf26	RNF26-1	0.287807	0.234182	0.251766	0.214756	0.232524	0.178868	0.231136	0.240087	0.237052	0.199753	0.266911	0.241263	0.294369	0.21321	0.319533	0.275795	0.220464	0.46913	0.368647
Rnf31	RNF31-1	1.23504	1.27456	1.15113	1.32666	1.29585	1.32371	1.0822	1.19427	1.17266	1.25584	1.08627	1.06391	1.07686	1.05229	1.18612	1.07472	0.701503	0.603303	0.677236
Rnf31	RNF31-2	1.51904	1.72623	1.51432	1.8165	1.74947	1.75954	1.34377	1.45184	1.55566	1.51559	1.33787	1.09056	1.37338	1.37412	1.40307	1.53282	0.741477	0.647435	0.839204
Rnf32	RNF32-1	0.0167458	0.0235595	0.0321183	0.0197619	0.0260521	0.0216085	0.0245649	0.0136507	0.012465	0.00900489	0.0168063	0.054338	0.0374785	0.0465216	0.0313556	0.0878337	0.0895384	0.387107	0.131336
Rnf32	RNF32-2	0.421496	0.384382	0.330832	0.390507	0.379252	0.376695	0.471358	0.330681	0.40597	0.342307	0.432912	0.492581	0.39194	0.411304	0.413297	0.497307	0.676165	0.799909	0.513005
Rnf34	RNF34-2	0.526696	0.519885	0.5254	0.554163	0.573738	0.58892	0.554081	0.466084	0.51591	0.592999	0.54562	0.554679	0.560585	0.528122	0.566542	0.624983	0.799548	0.755317	0.520663
Rnf38	RNF38-1	1.1523	1.14915	1.25063	1.31027	1.10896	1.13251	0.903284	1.02781	0.962993	0.941049	0.828333	0.529216	0.696609	0.963978	0.99403	0.821429	0.551266	0.479861	0.537067
Rnf38	RNF38-5	2.37359	2.23152	2.72487	2.38301	2.4523	2.39176	2.14505	2.34627	2.21902	2.55468	2.08597	1.77805	1.81686	1.99991	2.24483	1.82097	1.44561	0.60244	1.52519
Rnf39	RNF39-1	0.0129954	0.0262067	0.0356516	0.0248602	0.0266802	0.0212656	0.0152246	0.0124445	0.00819658	0.00884302	0.0203473	0.0645193	0.0320812	0.020933	0.0269404	0.109509	0.0791459	0.572249	0.117151
Rnf39	RNF39-2	0.00926939	0.0167647	0.0272198	0.0199215	0.0193393	0.0161092	0.00917337	0.00414213	0.00297916	0.00300763	0.00438643	0.0402376	0.0194283	0.029657	0.0158545	0.0900085	0.0542115	0.57563	0.112316
Rnf40	RNF40-1	1.04883	1.19124	1.06441	0.883882	1.1819	1.22434	1.25211	1.0778	1.15576	1.13728	1.30513	1.13226	1.06069	1.22317	1.25981	1.04527	0.704377	0.684096	0.732063
Rnf40	RNF40-2	0.754729	0.715422	0.691207	0.706241	0.72858	0.771837	0.699582	0.714513	0.698357	0.707429	0.709217	0.553243	0.588055	0.697635	0.738922	0.729863	0.372873	0.354616	0.377945
Rnf8	RNF8-3	0.403289	0.361766	0.341542	0.411213	0.358825	0.439552	0.292674	0.24763	0.256421	0.278659	0.363	0.276075	0.241752	0.314299	0.376324	0.308318	0.367733	0.481308	0.403475
Rprd1a	RPRD1A-1	0.189793	0.22377	0.178277	0.22283	0.194841	0.199701	0.166868	0.175869	0.203789	0.159352	0.155936	0.177023	0.135488	0.153897	0.18048	0.215053	0.27986	0.424592	0.303693
Rprd1a	RPRD1A-2	0.193103	0.204907	0.177423	0.243942	0.21979	0.229219	0.180617	0.181105	0.221197	0.153455	0.146608	0.221712	0.162008	0.169151	0.194183	0.258408	0.319597	0.652923	0.271282
Rybp	RYBP-1	0.844012	0.921873	0.893496	0.937566	1.04435	1.0642	0.724818	0.774777	0.730448	0.823852	0.829894	0.700841	0.773603	0.820413	0.866299	0.939649	0.713831	0.600379	0.561455
Rybp	RYBP-2	0.535072	0.488965	0.530783	0.547083	0.549762	0.600811	0.381458	0.405592	0.462676	0.427171	0.474356	0.463959	0.452493	0.557418	0.518405	0.609303	0.489141	0.981844	0.569923
Scmh1	SCMH1-1	0.499029	0.467298	0.503729	0.525157	0.477156	0.541439	0.377252	0.508888	0.462856	0.441483	0.480842	0.30929	0.399102	0.368396	0.461992	0.477049	0.333789	0.45576	0.251981
Setd1a	SETD1A-3	0.44894	0.421357	0.4037	0.431658	0.471014	0.419783	0.685133	0.507921	0.48061	0.444754	0.570228	0.621241	0.554308	0.569538	0.597498	0.559804	0.393533	0.807961	0.650498
Setd2	SETD2-1	4.62325	7.15124	7.31092	7.36829	6.06001	8.61714	4.63494	5.60254	4.70922	5.45635	4.48356	4.10056	4.43392	4.83531	5.56999	4.68335	2.01843	0.882069	1.93402
Setd2	SETD2-3	1.13088	1.17351	1.30031	1.30798	1.19374	1.25373	1.1231	1.32551	1.0313	1.07306	1.0332	0.769719	0.795319	0.96929	1.10047	0.98729	0.543274	0.578848	0.518899
Setd7	SETD7-2	0.724529	0.779833	0.839497	0.942564	0.790698	0.799528	0.654579	0.792217	0.704657	0.734551	0.656089	0.421802	0.528128	0.592267	0.670592	0.70679	0.283868	0.455885	0.364229
Kmt5a	SETD8-5	0.765655	0.702005	0.641575	0.543113	0.596553	0.48121	0.658524	0.572808	0.637262	0.521808	0.553615	0.580237	0.80861	0.527611	0.755594	0.583805	1.05279	0.864589	1.14079
Setdb1	SETDB1-6	0.496405	0.493728	0.479424	0.520669	0.49772	0.525363	0.416067	0.501282	0.530328	0.445631	0.426223	0.430614	0.43605	0.505347	0.458715	0.427208	0.39148	0.517033	0.437713
Setdb1	SETDB1-7	0.659115	0.687656	0.584086	0.740828	0.60872	0.644553	0.539387	0.609454	0.662513	0.620745	0.546005	0.494668	0.633539	0.533949	0.651506	0.620957	0.447571	0.673817	0.42179
Setdb2	SETDB2-1	0.697438	0.691771	0.828716	0.760196	0.629493	0.676204	0.710495	0.644111	0.682034	0.74979	0.54151	0.746543	0.638951	0.728697	0.586417	0.699876	0.536493	0.677491	0.720136
Setdb2	SETDB2-2	0.477732	0.570783	0.503341	0.58245	0.578916	0.56221	0.495348	0.451955	0.404109	0.494018	0.482175	0.502517	0.457524	0.509417	0.47359	0.518971	0.418652	0.649514	0.446483
Sfmbt1	SFMBT1-1	0.377213	0.371634	0.347112	0.354743	0.356991	0.319379	0.328961	0.379214	0.409245	0.396621	0.353595	0.333042	0.350091	0.349829	0.382159	0.396109	0.335061	0.560343	0.3729
Sirt2	SIRT2-1	1.31385	1.52255	1.39081	1.40722	1.37565	1.40414	1.51058	1.41283	1.55863	1.57144	1.36795	1.59507	1.4307	1.49728	1.58899	1.65473	1.60249	1.14422	1.1662
Sirt2	SIRT2-2	2.69001	3.01249	2.17573	2.82247	2.7598	2.86808	1.9563	2.75437	2.63964	2.55248	2.34628	1.50114	1.86929	2.30809	2.66109	2.51051	2.01296	0.479404	0.95169
Sirt4	SIRT4-1	0.180119	0.185534	0.176067	0.174449	0.210013	0.204761	0.187125	0.183555	0.227603	0.201177	0.192948	0.238166	0.177368	0.199458	0.185328	0.262675	0.314089	0.566722	0.307735
Sirt5	SIRT5-1	0.0849151	0.0803098	0.0862054	0.0954929	0.108931	0.112819	0.0863431	0.0902227	0.0918798	0.0785212	0.0867736	0.090174	0.0815872	0.0936529	0.0999464	0.142073	0.101352	0.353664	0.175017
Sirt6	SIRT6-1	0.468338	0.469184	0.471374	0.472327	0.480793	0.452284	0.515312	0.453393	0.532797	0.51768	0.487234	0.512787	0.537428	0.570254	0.503354	0.594305	0.522316	0.672618	0.52265
Sirt7	SIRT7-1	2.63157	2.01277	1.77579	2.2218	2.32582	2.70827	2.42608	2.15118	2.93195	2.25031	2.27064	2.3902	2.13063	2.62715	2.49494	2.73857	3.61637	2.81937	2.10343
Smyd2	SMYD2-1	0.355587	0.269223	0.182344	0.262506	0.245479	0.26014	0.28521	0.222246	0.31197	0.248997	0.232642	0.324138	0.304985	0.29936	0.31584	0.29084	0.448314	0.548154	0.399831
Smyd3	SMYD3-1	0.224753	0.169296	0.199951	0.181247	0.222305	0.198662	0.262855	0.20227	0.209034	0.189869	0.241918	0.320995	0.252019	0.251972	0.260302	0.296029	0.306025	0.646595	0.395789
Smyd3	SMYD3-2	0.233171	0.178038	0.177954	0.19546	0.208007	0.213425	0.230717	0.210767	0.211796	0.205349	0.227555	0.264155	0.216749	0.25554	0.244311	0.278755	0.285347	0.38014	0.304367
Sox2	SOX2-3	0.0372038	0.0627767	0.0820083	0.0670665	0.0813594	0.0598666	0.0281645	0.00986026	0.00442894	0.00367534	0.0147644	0.181196	0.0859653	0.0847506	0.0822787	0.369898	0.174209	1.43809	0.445891
Sox6	SOX6-3	0.475553	0.444067	0.663891	0.212339	0.376275	0.168088	0.0965333	0.254662	0.260015	0.0903552	0.248394	0.273678	0.723198	0.13388	0.43028	0.0985872	0.373542	0.71271	1.49887
Sox6	SOX6-4	0.304231	0.326854	0.414731	0.139663	0.238978	0.118668	0.0577224	0.155178	0.174547	0.0658492	0.16703	0.122841	0.333263	0.107476	0.301006	0.107915	0.184131	0.523549	0.590476
Ssrp1	SSRP1-2	2.35834	1.79211	1.82253	1.59766	2.22202	1.65796	3.52958	2.11155	2.33357	1.77161	2.80321	3.35886	2.78507	2.80297	3.23894	2.74222	2.7812	3.37961	3.78618
Ssrp1	SSRP1-5	2.22495	2.00471	1.8053	1.71622	2.03189	1.74206	2.00674	1.96453	2.11878	2.08722	2.13424	2.12738	2.12027	1.95192	2.11265	1.87358	2.11465	0.713282	2.0402
Stag1	STAG1-1	0.641718	0.746215	0.736004	0.654994	0.626164	0.618418	0.664813	0.738672	0.67798	0.538237	0.5844	0.558613	0.59976	0.606719	0.664875	0.591624	0.524257	0.578884	0.560794
Stag1	STAG1-2	0.955985	0.893335	0.814029	0.856556	0.789106	0.739429	1.08463	0.928507	0.921594	0.762772	0.809186	1.04632	0.904624	0.958479	1.02822	1.01375	1.14932	1.03174	1.10957
Stat3	STAT3-1	1.46805	1.5967	1.62492	1.7704	1.61992	1.69746	1.54257	1.64113	1.47985	1.86439	1.65415	1.82198	1.48286	1.85777	1.6318	1.74812	1.25597	0.678874	1.22788
Stat3	STAT3-3	1.87245	2.05661	2.0722	2.15245	1.9479	2.0042	1.99713	2.20032	1.88804	2.34187	2.14462	2.11924	1.924	2.51041	2.0694	2.18374	1.54977	0.905786	1.54117
Suds3	SUDS3-1	1.14139	0.979187	0.832407	0.947523	0.972382	0.954933	1.108	1.02255	1.14343	1.12158	0.990181	1.04387	1.20316	1.07942	1.14881	1.22242	1.90634	1.43138	1.52037
Suv420h1	SUV420H1-1	0.681359	0.689674	0.690268	0.785247	0.752642	0.746619	0.620726	0.694599	0.667269	0.698174	0.63823	0.475678	0.572285	0.708239	0.669288	0.72611	0.463262	0.561653	0.367396
Suz12	SUZ12-1	1.06423	1.04242	0.992437	0.962015	0.922316	0.784955	0.911142	0.962838	0.90764	0.939225	0.809258	0.879876	1.14598	0.892397	0.926967	0.910038	0.867341	0.900374	1.20254
Tbx3	TBX3-3	0.0700101	0.103012	0.0741326	0.118814	0.0855649	0.127926	0.0538807	0.0778438	0.0868138	0.0661294	0.0566935	0.0837085	0.0560944	0.0626935	0.0751866	0.117497	0.0682458	0.369221	0.166545
Tcf3	TCF3-2	3.68548	3.24355	3.36718	3.44388	3.65274	3.38845	3.08556	3.54573	3.28857	3.67017	3.94167	2.52894	3.18976	2.85796	3.42716	2.64741	1.86137	0.409743	1.7514
Tet2	TET2-1	3.97107	4.23712	4.62086	4.46364	4.96515	3.68612	3.71566	4.75714	3.96158	4.69147	4.07018	3.36042	3.45136	3.86785	3.3061	3.57187	2.84976	3.42325	2.82981
Tet3	TET3-3	1.51748	1.59472	2.11316	2.00436	1.75285	1.70766	1.4386	1.79933	1.36765	1.61128	1.4186	1.16636	0.945097	1.28867	1.34427	1.13601	0.407532	0.524531	0.544893
Tmpo	TMPO-1	0.773629	0.772624	0.692189	0.603249	0.624799	0.552218	0.53638	0.692275	0.70795	0.621724	0.656468	0.691737	0.855572	0.674714	0.778963	0.587102	0.924452	0.902706	1.14825
Tmpo	TMPO-2	0.634928	0.59974	0.590254	0.59581	0.731644	0.537544	0.508376	0.61424	0.707453	0.601274	0.549128	0.527979	0.73311	0.600205	0.613097	0.549438	0.760622	0.829157	0.935367
Trp53	TP53-3	5.11595	4.82283	5.093	5.1234	4.8444	4.9804	5.23882	4.42086	5.65998	5.54485	5.10937	4.92012	4.49941	4.31948	5.422	4.60778	3.76448	0.969702	4.16709
Trp53bp1	TP53BP1-1	0.362163	0.425451	0.393969	0.500939	0.458042	0.43686	0.353692	0.42241	0.392045	0.445194	0.342715	0.360089	0.303767	0.415104	0.37673	0.388349	0.23588	0.506748	0.287692
Trp53bp1	TP53BP1-3	0.347185	0.360128	0.405223	0.411691	0.403017	0.364515	0.388972	0.447203	0.346795	0.304924	0.348398	0.391939	0.343169	0.426086	0.384643	0.471148	0.396412	0.617339	0.438652
Trdmt1	TRDMT1-1	0.0916368	0.0877666	0.0733626	0.0777176	0.0805035	0.0992194	0.0974121	0.0775312	0.0763441	0.0913909	0.0776139	0.117521	0.0839553	0.113924	0.128311	0.179572	0.157879	0.496044	0.18811
Uhrf1	UHRF1-4	1.30015	1.4751	0.991127	0.980561	0.912107	0.533158	0.63058	0.773668	0.874821	0.920672	0.956977	0.703987	1.23482	0.693467	1.02432	0.720898	1.00097	0.685964	1.14319
Vps72	VPS72-1	1.21224	1.26835	0.999003	1.13873	1.32149	1.13559	1.17573	1.29829	1.49287	1.18382	1.16073	1.30131	1.27768	1.1716	1.26461	1.41212	1.60499	0.958612	1.40481
Wdr5	WDR5-1	0.590461	0.489568	0.398276	0.461011	0.529636	0.477527	0.562302	0.491895	0.608639	0.486334	0.540006	0.535983	0.564107	0.516513	0.576545	0.648887	0.818454	0.949919	0.673112
Whsc1	WHSC1-4	0.988281	0.921373	0.773939	0.684328	0.671097	0.489231	0.446481	0.620382	0.606544	0.639945	0.602539	0.545241	0.872596	0.690855	0.832419	0.595355	0.844122	2.11333	1.14617
Whsc1	WHSC1-6	0.581726	0.624004	0.510635	0.470993	0.422151	0.37122	0.354918	0.461238	0.487476	0.457667	0.409524	0.386677	0.626535	0.349543	0.537462	0.424473	0.550015	0.979304	0.654045
Whsc1l1	WHSC1L1-2	1.56583	1.92973	1.91755	1.9356	1.79453	1.61564	1.70757	1.81166	1.47441	1.71953	1.59034	1.40053	1.64752	1.69156	1.77154	1.5264	1.0987	1.10659	1.18325
Wnt8a	WNT8A-1	0.00595908	0.00891534	0.0188303	0.00835453	0.0101194	0.00856698	0.0045499	0.000934809	0.00259044	0.00118191	0.00308995	0.0330859	0.0184256	0.0150229	0.0135876	0.0709981	0.040174	0.444583	0.102758
Yaf2	YAF2-2	0.556449	0.521803	0.488143	0.484498	0.502447	0.514337	0.513839	0.498446	0.54161	0.540384	0.524758	0.679886	0.605449	0.542922	0.580685	0.548746	1.16463	1.04015	0.874215
Zic2	ZIC2-1	0.0900472	0.113268	0.162483	0.115502	0.110511	0.126233	0.044403	0.0122551	0.0189159	0.0052122	0.0314977	0.282788	0.170419	0.154259	0.119659	0.738534	0.444851	3.10293	0.816869
Zic2	ZIC2-2	0.0718684	0.139972	0.206109	0.137199	0.225638	0.115894	0.0791841	0.019487	0.0340359	0.0194185	0.0445754	0.407961	0.175921	0.181191	0.210685	0.906794	0.514829	4.14605	0.928188
Dnajb1	DNAJB1-1	0.746507	0.772327	1.02083	1.27477	1.02608	1.15039	0.430953	0.339014	0.414063	0.44507	0.621547	0.548094	0.719101	0.460137	0.556504	0.592559	1.05023	0.880486	0.940696
Min		0.00508036	0.00881449	0.014778	0.00835453	0.0101194	0.00856698	0.00250488	0.000934809	6.44858e-05	0.000305898	0.00197027	0.0257003	0.0129039	0.0133005	0.0119726	0.051244	0.0367321	0.118559	0.0614639
Max		27.4926	32.8933	33.4004	28.4122	30.1035	32.5302	36.6954	29.732	29.8208	34.7011	35.6561	38.0646	40.2661	41.0803	27.5398	30.7525	26.8804	28.4529	34.9059
Std		2.06126	2.19184	2.24287	1.98736	2.08172	2.22344	2.4301	2.09784	2.16038	2.37575	2.44895	2.65573	2.68475	2.62863	1.98311	2.1661	2.5209	2.36531	2.67791
Avg		1	1	1	1	1	1	1	1	1	1	1	1	1	1	1	1	1	1	1
Median		0.584344	0.596231	0.566922	0.578598	0.576327	0.563382	0.536692	0.540421	0.569538	0.511046	0.544229	0.531693	0.568196	0.541506	0.583551	0.585453	0.508954	0.580743	0.525893
